# Supplementary material for: Polygenic Risk Score and Risk Factors for Gestational Diabetes
Source: Preprints.org preprint supplement (doi:10.20944/preprints202207.0305.v1), 2022-07-20
Supplement: Supplementary file 1 [file supplementary]

## Sheet: Gene_annotations_SNP-Nexus
Variation ID	Chromosome	Position	Overlapped Gene	Type	Annotation	Nearest Upstream Gene	Type of Nearest Upstream Gene	Distance to Nearest Upstream Gene	Nearest Downstream Gene	Type of Nearest Downstream Gene	Distance to Nearest Downstream Gene
rs7957197	chr12	121460686	OASL	protein_coding	3downstream,intronic	None	None	None	None	None	None
rs17807135	chr2	203633245	FAM117B	protein_coding	3utr	None	None	None	None	None	None
rs3802177	chr8	118185025	SLC30A8	protein_coding	3utr,3downstream	None	None	None	None	None	None
rs72822657	chr17	42155408	HDAC5	protein_coding	3utr,3downstream	None	None	None	None	None	None
rs4841132	chr8	9183596	RP11-115J16.1	lincRNA	5upstream,3downstream,non-coding	None	None	None	None	None	None
rs1801278	chr2	227660544	IRS1	protein_coding	5upstream,coding nonsyn|nonsyn	None	None	None	None	None	None
rs290487	chr10	114909731	TCF7L2	protein_coding	5upstream,intronic	None	None	None	None	None	None
rs340874	chr1	214159256	PROX1	protein_coding	5upstream,intronic	None	None	None	None	None	None
rs9379084	chr6	7231843	RREB1	protein_coding	coding nonsyn,3downstream	None	None	None	None	None	None
rs7903146	chr10	114758349	TCF7L2	protein_coding	intronic	None	None	None	None	None	None
rs11920090	chr3	170717521	SLC2A2	protein_coding	intronic	None	None	None	None	None	None
rs34882181	chr9	9436890	PTPRD	protein_coding	intronic	None	None	None	None	None	None
rs57617664	chr9	138956057	NACC2	protein_coding	intronic	None	None	None	None	None	None
rs4945149	chr11	76852039	MYO7A	protein_coding	intronic	None	None	None	None	None	None
rs10830963	chr11	92708710	MTNR1B	protein_coding	intronic	None	None	None	None	None	None
rs6959526	chr7	141760546	MGAM	protein_coding	intronic	None	None	None	None	None	None
rs7944584	chr11	47336320	MADD	protein_coding	intronic	None	None	None	None	None	None
rs112674932	chr7	104065454	LHFPL3	protein_coding	intronic	None	None	None	None	None	None
rs71842909	chr12	25772175	IFLTD1	protein_coding	intronic	None	None	None	None	None	None
rs4430796	chr17	36098040	HNF1B	protein_coding	intronic	None	None	None	None	None	None
rs4746822	chr10	70982941	HKDC1	protein_coding	intronic	None	None	None	None	None	None
rs79953201	chr5	83005094	HAPLN1	protein_coding	intronic	None	None	None	None	None	None
rs78561521	chr10	87456871	GRID1	protein_coding	intronic	None	None	None	None	None	None
rs11787792	chr9	139252148	GPSM1	protein_coding	intronic	None	None	None	None	None	None
rs9366198	chr6	170608950	FAM120B	protein_coding	intronic	None	None	None	None	None	None
rs174550	chr11	61571478	FADS2	protein_coding	intronic	None	None	None	None	None	None
rs16955379	chr16	81489373	CMIP	protein_coding	intronic	None	None	None	None	None	None
rs9465871	chr6	20717255	CDKAL1	protein_coding	intronic	None	None	None	None	None	None
rs6517656	chr21	42583738	BACE2	protein_coding	intronic	None	None	None	None	None	None
rs11634981	chr15	87461234	AGBL1	protein_coding	intronic	None	None	None	None	None	None
rs11708067	chr3	123065778	ADCY5	protein_coding	intronic	None	None	None	None	None	None
rs5219	chr11	17409572	KCNJ11	protein_coding	intronic,coding nonsyn:stop-gain|nonsyn,5upstream,coding *nonsyn:stop-gain|nonsyn,5utr	None	None	None	None	None	None
rs62052363	chr16	81219352	PKD1L2	polymorphic_pseudogene	intronic,non-coding intronic	None	None	None	None	None	None
rs535447438	chr1	81810368	LPHN2	protein_coding	intronic,non-coding intronic	None	None	None	None	None	None
rs7041847	chr9	4287466	GLIS3	protein_coding	intronic,non-coding intronic	None	None	None	None	None	None
rs116966095	chr16	75377450	CFDP1	protein_coding	intronic,non-coding intronic	None	None	None	None	None	None
rs1801282	chr3	12393125	PPARG	protein_coding	intronic,non-coding,coding nonsyn,non-coding intronic	None	None	None	None	None	None
rs4746822	chr10	70982941	RP11-227H15.4	antisense	non-coding	None	None	None	None	None	None
rs340874	chr1	214159256	PROX1-AS1	antisense	non-coding intronic	None	None	None	None	None	None
rs4607517	chr7	44235668	GCK	protein_coding	non-coding intronic	None	None	None	None	None	None
rs6235	chr5	95728898	CTD-2337A12.1	antisense	non-coding intronic	None	None	None	None	None	None
rs144754710	chr14	38588163	CTD-2058B24.2	antisense	non-coding intronic	None	None	None	None	None	None
rs568927434	chr4	88901057	SPP1	protein_coding	non-coding intronic,3downstream,intronic	None	None	None	None	None	None
rs560887	chr2	169763148	SPC25	protein_coding	non-coding intronic,intronic	None	None	None	None	None	None
rs116847631	chr11	100924361	PGR	protein_coding	non-coding intronic,intronic	None	None	None	None	None	None
rs3786897	chr19	33893008	PEPD	protein_coding	non-coding intronic,intronic	None	None	None	None	None	None
rs163184	chr11	2847069	KCNQ1	protein_coding	non-coding intronic,intronic	None	None	None	None	None	None
rs2237892	chr11	2839751	KCNQ1	protein_coding	non-coding intronic,intronic	None	None	None	None	None	None
rs4376068	chr3	185497635	IGF2BP2	protein_coding	non-coding intronic,intronic	None	None	None	None	None	None
rs7178572	chr15	77747190	HMG20A	protein_coding	non-coding intronic,intronic	None	None	None	None	None	None
rs560887	chr2	169763148	G6PC2	protein_coding	non-coding intronic,intronic	None	None	None	None	None	None
rs7202116	chr16	53821615	FTO	protein_coding	non-coding intronic,intronic	None	None	None	None	None	None
rs112204899	chr15	64336203	DAPK2	protein_coding	non-coding intronic,intronic	None	None	None	None	None	None
rs11605924	chr11	45873091	CRY2	protein_coding	non-coding intronic,intronic	None	None	None	None	None	None
rs62170385	chr2	144034543	ARHGAP15	protein_coding	non-coding intronic,intronic	None	None	None	None	None	None
rs174550	chr11	61571478	FADS1	protein_coding	non-coding intronic,intronic,5utr	None	None	None	None	None	None
rs1260326	chr2	27730940	GCKR	protein_coding	non-coding,3downstream,coding nonsyn	None	None	None	None	None	None
rs6235	chr5	95728898	PCSK1	protein_coding	non-coding,coding nonsyn	None	None	None	None	None	None
rs10811661	chr9	22134094	None	None	None	CDKN2B-AS1	antisense	12998	RP11-408N14.1	lincRNA	69895
rs10885122	chr10	113042093	None	None	None	RP11-479A21.1	pseudogene	177087	BTBD7P2	pseudogene	40443
rs112093993	chr11	68791294	None	None	None	RP11-554A11.6	antisense	5379	TPCN2	protein_coding	25071
rs11257655	chr10	12307894	None	None	None	RN7SL232P	misc_RNA	3968	RN7SL198P	misc_RNA	62241
rs11910707	chr21	48042513	None	None	None	S100B	protein_coding	17392	PRMT2	protein_coding	12566
rs1344482	chr16	52802541	None	None	None	RP11-297L17.6	pseudogene	112579	RP11-467J12.1	pseudogene	166184
rs139622108	chr6	164199053	None	None	None	RP1-230L10.1	lincRNA	18180	RN7SL366P	misc_RNA	62540
rs141240229	chr4	106434652	None	None	None	EEF1A1P9	pseudogene	27415	AC004066.2	pseudogene	13101
rs1436953	chr15	62414014	None	None	None	NPM1P47	pseudogene	38510	C2CD4B	protein_coding	41720
rs16916234	chr10	63262152	None	None	None	RP11-809M12.1	antisense	20438	C10orf107	protein_coding	160567
rs2191349	chr7	15064309	None	None	None	AC006045.3	pseudogene	38610	AC006458.3	lincRNA	41523
rs237282	chr17	12341836	None	None	None	RP11-471L13.2	lincRNA	223252	LINC00670	lincRNA	111263
rs2866307	chr4	12260788	None	None	None	RP11-168E17.1	lincRNA	7878	RNU6-578P	snRNA	53424
rs34075917	chr5	73843327	None	None	None	CTC-419K13.1	lincRNA	10526	ENC1	protein_coding	79907
rs4480259	chrX	86228096	None	None	None	RP3-431C21.1	pseudogene	84277	RP11-192B18.1	pseudogene	170761
rs5015480	chr10	94465559	None	None	None	HHEX	protein_coding	10156	Y_RNA	misc_RNA	4697
rs537751807	chr14	84743121	None	None	None	CTD-2320B12.2	pseudogene	99689	RNU6-976P	snRNA	463165
rs5923713	chrX	86227751	None	None	None	RP3-431C21.1	pseudogene	83932	RP11-192B18.1	pseudogene	171106
rs5945326	chrX	152899922	None	None	None	RP11-66N11.7	lincRNA	21542	DUSP9	protein_coding	8024
rs5954503	chrX	141144756	None	None	None	MAGEC1	protein_coding	147582	RP3-406C18.1	pseudogene	90892
rs62603092	chrX	135192425	None	None	None	RP11-274K13.5	pseudogene	11918	snoU13	snoRNA	24051
rs71645033	chr4	180789115	None	None	None	RP11-774G5.1	pseudogene	10381	RP11-751A18.1	pseudogene	705502
rs72827457	chr17	54109039	None	None	None	RP11-763E3.1	lincRNA	158739	AC011073.1	miRNA	23109
rs74519858	chr4	5023082	None	None	None	CYTL1	protein_coding	1883	STK32B	protein_coding	30087
rs745405171	chrX	118920293	None	None	None	SOWAHD	protein_coding	26129	RPL39	protein_coding	174
rs74785350	chr10	110645311	None	None	None	MAPKAPK5P1	pseudogene	35992	RN7SKP278	misc_RNA	55416
rs76346222	chr2	235513201	None	None	None	ARL4C	protein_coding	107504	AC010148.1	processed_transcript	229758
rs7743373	chr6	85773426	None	None	None	RP3-435K13.1	pseudogene	97083	RP3-455E7.1	pseudogene	91959
rs9450812	chr6	88553845	None	None	None	Y_RNA	misc_RNA	17842	RN7SL183P	misc_RNA	1523
rs9505667	chr6	1055655	None	None	None	RP5-856G1.1	lincRNA	28195	AL033381.1	protein_coding	24509

## Sheet: GWAS_SNP-Nexus
Variation ID	Chromosome	Trait	p-Value	Catalogue ID	Risk Allele	Allele Frequency	Population	Region	Genes	Platform	PubMed
rs340874	chr1	Type 2 diabetes	5e-48	rs340874	None	0.5528	148,726 European ancestry cases, 965,732 European ancestry controls	1q32.3	None	Affymetrix, Illumina [1198787] (imputed)	32541925
rs340874	chr1	Type 2 diabetes	6e-45	rs340874	None	0.4991	148,726 European ancestry cases, 24,646 African American cases, 8,616 Hispanic cases, 46,511 Asian ancestry cases, 965,732 European ancestry controls, 31,446 African American controls, 11,829 Hispanic controls, 169,776 Asian ancestry controls	1q32.3	None	Affymetrix, Illumina [at least 945603] (imputed)	32541925
rs340874	chr1	Glycemic traits (pleiotropy)	7e-09	rs340874	None	None	46,186 European ancestry individuals	1q32.3	PROX1	NR [NR]	31021400
rs340874	chr1	Type 2 diabetes	3e-12	rs340874	None	None	approximately 459,000 European ancestry individuals	1q32.3		NR [~ 8900000] (imputed)	30595370
rs340874	chr1	Type 2 diabetes	2e-22	rs340874	None	0.5555	74,124 European ancestry cases, 824,006 European ancestry controls	1q32.3	PROX1	Affymetrix, Illumina [~ 27000000] (imputed)	30297969
rs340874	chr1	Type 2 diabetes	8e-18	rs340874	None	0.436096	61,714 European ancestry cases, 1,178 Pakistani ancestry cases, 593,952 European ancestry controls, 2,472 Pakistani ancestry controls	1q32.3	PROX1-AS1	NR [5035015] (imputed)	30054458
rs340874	chr1	Type 2 diabetes	1e-07	rs340874	None	None	19,693 European ancestry cases, 107,308 European ancestry controls, 6,952 East Asian ancestry cases, 11,865 East Asian ancestry controls, 5,561 South Asian ancestry cases, 14,458 South Asian ancestry controls, 1,804 Mexican ancestry cases, 779 Mexican ancestry controls	1q32.3	PROX1	Affymetrix, Illumina [1918233] (imputed)	29358691
rs340874	chr1	Type 2 diabetes	6e-10	rs340874	None	0.5308	6,353 South Asian ancestry cases, 7,179 South Asian ancestry controls, 3,871 European ancestry cases, 16,427 European ancestry controls, 34,840 cases, 114,981 controls	1q32.3	PROX1-AS1	Affymetrix, Illumina [NR] (imputed)	28869590
rs340874	chr1	Type 2 diabetes	1e-08	rs340874	None	0.5308	6,353 South Asian ancestry cases, 7,179 South Asian ancestry controls, 3,871 European ancestry cases, 16,427 European ancestry controls, 34,840 cases, 114,981 controls	1q32.3	PROX1-AS1	Affymetrix, Illumina [NR] (imputed)	28869590
rs340874	chr1	Fasting blood glucose (BMI interaction)	4e-09	rs340874	None	0.4754	Up to 58,074 European ancestry individuals	1q32.3	PROX1	Affymetrix, Illumina [~ 2400000] (imputed)	22581228
rs340874	chr1	Fasting blood glucose	9e-07	rs340874	None	0.4832	Up to 58,074 European ancestry individuals	1q32.3	PROX1	Affymetrix, Illumina [~ 2400000] (imputed)	22581228
rs340874	chr1	Homeostasis model assessment of beta-cell function	5e-06	rs340874	None	0.52	36,466 European ancestry individuals	1q32.3	PROX1	Affymetrix, Illumina [~ 2500000] (imputed)	20081858
rs340874	chr1	Fasting blood glucose	7e-12	rs340874	None	0.52	46,186 European ancestry individuals	1q32.3	PROX1	Affymetrix, Illumina [~ 2500000] (imputed)	20081858
rs11257655	chr10	Type 2 diabetes	7e-35	rs11257655	None	0.7809	148,726 European ancestry cases, 965,732 European ancestry controls	10p13	None	Affymetrix, Illumina [1198787] (imputed)	32541925
rs11257655	chr10	Type 2 diabetes	1e-63	rs11257655	None	0.7044	148,726 European ancestry cases, 24,646 African American cases, 8,616 Hispanic cases, 46,511 Asian ancestry cases, 965,732 European ancestry controls, 31,446 African American controls, 11,829 Hispanic controls, 169,776 Asian ancestry controls	10p13	None	Affymetrix, Illumina [at least 945603] (imputed)	32541925
rs11257655	chr10	Circulating leptin levels or type 2 diabetes	9e-11	rs11257655	None	None	254,263 individuals	10p13	CDC123	NR [NR]	32341051
rs11257655	chr10	Medication use (drugs used in diabetes)	3e-12	rs11257655	None	0.208417	15,272 European ancestry cases, 29,0641 European ancestry controls	10p13	Metazoa_SRP	Affymetrix [7288503] (imputed)	31015401
rs11257655	chr10	Type 2 diabetes	4e-14	rs11257655	None	None	approximately 459,000 European ancestry individuals	10p13		NR [~ 8900000] (imputed)	30595370
rs11257655	chr10	Type 2 diabetes	2e-32	rs11257655	None	0.2184	74,124 European ancestry cases, 824,006 European ancestry controls	10p13	CDC123, CAMK1D	Affymetrix, Illumina [~ 27000000] (imputed)	30297969
rs11257655	chr10	Type 2 diabetes	2e-17	rs11257655	None	0.206773	61,714 European ancestry cases, 1,178 Pakistani ancestry cases, 593,952 European ancestry controls, 2,472 Pakistani ancestry controls	10p13	CDC123	NR [5035015] (imputed)	30054458
rs11257655	chr10	Type 2 diabetes	4e-10	rs11257655	None	None	up to 12,931 European ancestry cases, up to 57,196 European ancestry controls	10p13	CDC123, CAMK1D	Affymetrix, Illumina [~ 13000000] (imputed)	29358691
rs11257655	chr10	Body mass index	7e-09	rs11257655	None	0.24	up to 72,390 Japanese ancestry women, up to 85,894 Japanese ancestry men	10p13	CDC123, CAMK1D	Illumina [6108953] (imputed)	28892062
rs11257655	chr10	Type 2 diabetes	3e-29	rs11257655	None	0.2266	6,353 South Asian ancestry cases, 7,179 South Asian ancestry controls, 3,871 European ancestry cases, 16,427 European ancestry controls, 34,840 cases, 114,981 controls	10p13	CDC123	Affymetrix, Illumina [NR] (imputed)	28869590
rs11257655	chr10	Type 2 diabetes	3e-10	rs11257655	None	0.2266	6,353 South Asian ancestry cases, 7,179 South Asian ancestry controls, 3,871 European ancestry cases, 16,427 European ancestry controls, 34,840 cases, 114,981 controls	10p13	CDC123	Affymetrix, Illumina [NR] (imputed)	28869590
rs11257655	chr10	Type 2 diabetes	5e-06	rs11257655	None	None	4,040 British ancestry cases, 113,735 British ancestry controls	10p13	CDC123, CAMK1D	NR [9288881] (imputed)	26961502
rs11257655	chr10	Type 2 diabetes	1e-12	rs11257655	None	None	15,463 Japanese ancestry cases, 26,183 Japanese ancestry controls	10p13	CDC123, CAMK1D	Illumina [7521072] (imputed)	26818947
rs11257655	chr10	Type 2 diabetes	3e-09	rs11257655	None	0.23	12,171 European ancestry cases, 56,862 European ancestry controls, 6,952 East Asian ancestry cases, 11,865 East Asian ancestry controls, 5,561 South Asian ancestry cases, 14,458 South Asian ancestry controls, 1,804 Mexican ancestry cases, 779 Mexican ancestry controls	10p13	CDC123	Affymetrix, Illumina [2500000] (imputed)	24509480
rs11257655	chr10	Type 2 diabetes	7e-09	rs11257655	None	0.564	1,839 Han Chinese ancestry cases, 1,873 Han Chinese ancestry controls	10p13	CDC123	Illumina [2234194] (imputed)	22961080
rs11257655	chr10	Type 2 diabetes	2e-06	rs11257655	None	0.231036	6,377 European ancestry male cases, 5,794 European ancestry female cases, 22,243 European ancestry male controls, 34,619 European ancestry female controls	10p13	CDC123, CAMK1D	Affymetrix, Illumina [up to 2500000] (imputed)	22885922
rs4746822	chr10	Glycemic traits (pregnancy)	1e-22	rs4746822	None	0.675	1,367 European ancestry individuals, 817 Hispanic individuals, 1,075 Afro-Caribbean individuals, 1,178 Thai ancestry individuals	10q22.1	SUPV3L1, SRGN, HK1, VPS26A, HKDC1	Illumina [up to 945994] (imputed)	23903356
rs5015480	chr10	Insulin levels in response to oral glucose tolerance test (30 minutes)	5e-07	rs5015480	None	0.447	3,344 Swedish ancestry individuals	10q23.33	HHEX, EXOC6	Illumina [at least 81396]	29093273
rs5015480	chr10	Type 2 diabetes	2e-09	rs5015480	None	0.57	2,112 lean type 2 diabetes cases, 4,123 obese type 2 diabetes cases, 54,412 controls	10q23.33	HHEX	NR [NR]	22693455
rs5015480	chr10	Type 2 diabetes	9e-06	rs5015480	None	0.17	1,019 Chinese ancestry cases, 1,710 Chinese ancestry controls	10q23.33	HHEX	Affymetrix [590887]	20862305
rs5015480	chr10	Type 2 diabetes	1e-15	rs5015480	None		8,130 European ancestry cases, 38,987 European ancestry controls	10q23.33	HHEX, IDE	Affymetrix, Illumina [2426886] (imputed)	20581827
rs5015480	chr10	Type 2 diabetes	7e-08	rs5015480	None	None	4,549 European ancestry cases, 5,579 European ancestry controls	10q23.33	HHEX	Affymetrix, Illumina [2202892] (imputed)	18372903
rs5015480	chr10	Type 2 diabetes	5e-06	rs5015480	None	0.57	1,924 European ancestry cases, 2,938 European ancestry controls	10q23.33	HHEX	Affymetrix [393453]	17463249
rs10885122	chr10	Glycemic traits (pleiotropy)	3e-11	rs10885122	None	None	46,186 European ancestry individuals	10q25.2	GATA3, CELF2	NR [NR]	31021400
rs10885122	chr10	Fasting blood glucose (BMI interaction)	9e-08	rs10885122	None	0.1142	Up to 58,074 European ancestry individuals	10q25.2	ADRA2A	Affymetrix, Illumina [~ 2400000] (imputed)	22581228
rs10885122	chr10	Fasting blood glucose	2e-07	rs10885122	None	0.1168	Up to 58,074 European ancestry individuals	10q25.2	ADRA2A	Affymetrix, Illumina [~ 2400000] (imputed)	22581228
rs10885122	chr10	Homeostasis model assessment of beta-cell function	2e-06	rs10885122	None	0.87	36,466 European ancestry individuals	10q25.2	ADRA2A	Affymetrix, Illumina [~ 2500000] (imputed)	20081858
rs10885122	chr10	Fasting blood glucose	3e-16	rs10885122	None	0.87	46,186 European ancestry individuals	10q25.2	ADRA2A	Affymetrix, Illumina [~ 2500000] (imputed)	20081858
rs7903146	chr10	Type 2 diabetes	3e-19	rs7903146	None	0.260835	8,616 Hispanic cases, 11,829 Hispanic controls	10q25.2	None	Affymetrix, Illumina [1077427] (imputed)	32541925
rs7903146	chr10	Type 2 diabetes	6e-60	rs7903146	None	0.706	24,646 African American cases, 31,446 African American controls	10q25.2	None	Affymetrix, Illumina [945603] (imputed)	32541925
rs7903146	chr10	Type 2 diabetes	0	rs7903146	None	0.7079	148,726 European ancestry cases, 965,732 European ancestry controls	10q25.2	None	Affymetrix, Illumina [1198787] (imputed)	32541925
rs7903146	chr10	Waist-to-hip ratio adjusted for BMI	2e-21	rs7903146	None	None	457,690 European ancestry individuals	10q25.2	None	Affymetrix [~ 8270000] (imputed)	31669095
rs7903146	chr10	Peripheral artery disease	4e-11	rs7903146	None	0.2937	24,009 European ancestry cases, 150,983 European ancestry controls, 5,373 African ancestry cases, 42,485 African ancestry controls, 1,925 Hispanic cases, 18,285 Hispanic controls	10q25.2	TCF7L2	Affymetrix [at least 20323458] (imputed)	31285632
rs7903146	chr10	Fasting blood glucose	8e-08	rs7903146	None	None	6,457 African American individuals, 13,556 Hispanic/Latino individuals, 1,918 Asian ancestry individuals, 1,400 Native Hawaiian ancestry individuals, 412 Native American ancestry individuals, 168 individuals	10q25.2	None	Illumina [29713514] (imputed)	31217584
rs7903146	chr10	Body mass index	1e-06	rs7903146	None	None	17,127 African American individuals, 21,955 Hispanic/Latino individuals, 4,647 Asian ancestry individuals, 3,936 Native Hawaiian ancestry individuals, 645 Native American ancestry individuals, 1,025 individuals	10q25.2	None	Illumina [32062178] (imputed)	31217584
rs7903146	chr10	Type 2 diabetes	1e-41	rs7903146	None	0.25	2,277 African American cases, 3,098 East Asian ancestry cases, 3,704 European ancestry cases, 6,215 Hispanic/Latino cases, 2,939 South Asian ancestry cases, 2,283 African American controls, 2,921 East Asian ancestry controls, 3,514 European ancestry controls, 5,939 Hispanic/Latino controls, 3,022 South Asian ancestry controls	10q25.2	TCF7L2	Affymetrix, Illumina [up to 35256845] (imputed)	31118516
rs7903146	chr10	Type 2 diabetes	5e-13	rs7903146	None	0.356	2,633 African ancestry cases, 1,714 African ancestry controls	10q25.2	TCF7L2	Affymetrix, Illumina [12148595] (imputed)	31049640
rs7903146	chr10	Offspring birth weight	9e-11	rs7903146	None	0.291228	210,267 European ancestry individuals, 19,802 individuals	10q25.2	TCF7L2	Affymetrix, Illumina [14869762] (imputed)	31043758
rs7903146	chr10	Medication use (drugs used in diabetes)	4e-145	rs7903146	None	0.291287	15,272 European ancestry cases, 29,0641 European ancestry controls	10q25.2	TCF7L2	Affymetrix [7288503] (imputed)	31015401
rs7903146	chr10	Medication use (HMG CoA reductase inhibitors)	2e-30	rs7903146	None	0.290995	73,475 European ancestry cases, 216,910 European ancestry controls	10q25.2	TCF7L2	Affymetrix [7288503] (imputed)	31015401
rs7903146	chr10	Type 2 diabetes	3e-203	rs7903146	None	None	approximately 459,000 European ancestry individuals	10q25.2		NR [~ 8900000] (imputed)	30595370
rs7903146	chr10	Systolic blood pressure	4e-10	rs7903146	None	0.2906	365,998 European ancestry individuals, 63,490 African ancestry individuals, 22,802 Hispanic individuals, 4,792 Asian ancestry individuals, 2,695 Native American ancestry individuals	10q25.2	TCF7L2	Affymetrix [NR] (imputed)	30578418
rs7903146	chr10	Pulse pressure	9e-17	rs7903146	None	0.2904	365,998 European ancestry individuals, 63,490 African ancestry individuals, 22,802 Hispanic individuals, 4,792 Asian ancestry individuals, 2,695 Native American ancestry individuals	10q25.2	TCF7L2	Affymetrix [NR] (imputed)	30578418
rs7903146	chr10	Glucosuria (moderate to severe)	3e-17	rs7903146	None	0.29779	6,109 Icelandic ancestry cases, 135,512 Icelandic ancestry controls (includes non-array genotyped, whole-genome imputed individuals)	10q25.2	TCF7L2	Illumina [32500000] (imputed)	30476138
rs7903146	chr10	Glucosuria (mild)	5e-07	rs7903146	None	0.2978	4,748 Icelandic ancestry cases, 135,512 Icelandic ancestry controls (includes non-array genotyped, whole-genome imputed individuals)	10q25.2	TCF7L2	Illumina [32500000] (imputed)	30476138
rs7903146	chr10	Glucosuria	4e-20	rs7903146	None	0.29779	10,857 Icelandic ancestry cases, 135,512 Icelandic ancestry controls (includes non-array genotyped, whole-genome imputed individuals)	10q25.2	TCF7L2	Illumina [32500000] (imputed)	30476138
rs7903146	chr10	Type 2 diabetes	3e-11	rs7903146	None	0.38	822 Greek ancestry cases, 1,125 Greek ancestry controls	10q25.2	TCF7L2	Illumina [14528340] (imputed)	30470734
rs7903146	chr10	Schizophrenia vs type 2 diabetes	1e-09	rs7903146	None	0.61	924 Greek ancestry schizophrenia cases, 822 Greek ancestry T2D cases	10q25.2	TCF7L2	Illumina [14528340] (imputed)	30470734
rs7903146	chr10	Type 2 diabetes	0	rs7903146	None	0.295	74,124 European ancestry cases, 824,006 European ancestry controls	10q25.2	TCF7L2	Affymetrix, Illumina [~ 27000000] (imputed)	30297969
rs7903146	chr10	Waist-to-hip ratio adjusted for BMI	1e-21	rs7903146	None	0.2798	379,501 European ancestry female individuals	10q25.2	None	NR [~ 27400000] (imputed)	30239722
rs7903146	chr10	Body mass index	2e-23	rs7903146	None	0.2787	806,834 European ancestry individuals	10q25.2	NA	NR [~ 27400000] (imputed)	30239722
rs7903146	chr10	Body mass index	2e-23	rs7903146	None	0.2787	374,756 European ancestry male individuals	10q25.2	NA	NR [~ 27400000] (imputed)	30239722
rs7903146	chr10	Body mass index	3e-14	rs7903146	None	None	315,347 European ancestry individuals, 8,322 Hispanic/Latino individuals, 7,290 East Asian ancestry individuals, 3,069 African American individuals, 459 South Asian ancestry individuals	10q25.2	None	Affymetrix [at least 28613428] (imputed)	30108127
rs7903146	chr10	Type 2 diabetes	0	rs7903146	None	0.291585	61,714 European ancestry cases, 1,178 Pakistani ancestry cases, 593,952 European ancestry controls, 2,472 Pakistani ancestry controls	10q25.2	TCF7L2	NR [5035015] (imputed)	30054458
rs7903146	chr10	Body mass index	3e-13	rs7903146	None		35,606 African American individuals, 26,048 Hispanic/Latino individuals, 22,466 Asian or Native Hawaiian ancestry individuals, 17,859 European ancestry individuals, 535 Native American individuals	10q25.2	TCF7L2	Illumina [at least 200000]	29381148
rs7903146	chr10	Body mass index	1e-18	rs7903146	None	0.31	up to 72,390 Japanese ancestry women, up to 85,894 Japanese ancestry men	10q25.2	TCF7L2	Illumina [6108953] (imputed)	28892062
rs7903146	chr10	Body mass index	9e-12	rs7903146	None	0.044	up to 72,390 Japanese ancestry women, up to 85,894 Japanese ancestry men	10q25.2	TCF7L2	Illumina [6108953] (imputed)	28892062
rs7903146	chr10	Type 2 diabetes	2e-184	rs7903146	None	0.3171	6,353 South Asian ancestry cases, 7,179 South Asian ancestry controls, 3,871 European ancestry cases, 16,427 European ancestry controls, 34,840 cases, 114,981 controls	10q25.2	TCF7L2	Affymetrix, Illumina [NR] (imputed)	28869590
rs7903146	chr10	Type 2 diabetes	1e-219	rs7903146	None	0.3171	6,353 South Asian ancestry cases, 7,179 South Asian ancestry controls, 3,871 European ancestry cases, 16,427 European ancestry controls, 34,840 cases, 114,981 controls	10q25.2	TCF7L2	Affymetrix, Illumina [NR] (imputed)	28869590
rs7903146	chr10	Type 2 diabetes	3e-23	rs7903146	None	0.2986	6,353 South Asian ancestry cases, 7,179 South Asian ancestry controls, 3,871 European ancestry cases, 16,427 European ancestry controls, 34,840 cases, 114,981 controls	10q25.2	TCF7L2	Affymetrix, Illumina [NR] (imputed)	28869590
rs7903146	chr10	Peak insulin response	7e-06	rs7903146	None		2,337 Hispanic individuals, 2,159 European ancestry individuals, 332 Pima Indian ancestry individuals	10q25.2	TCF7L2	Affymetrix, Illumina [~ 39000000] (imputed)	28490609
rs7903146	chr10	Body mass index in physically active individuals	1e-06	rs7903146	None	0.7145	1,957 African American women, 1,773 Filipino ancestry women, 305 Indian ancestry women, 67,609 European ancestry women, 1,206 African American men, 2,029 Indian ancestry men, 43,399 European ancestry men, at least 4,819 European ancestry individuals	10q25.2	TCF7L2	Affymetrix, Illumina, Perlegen [~ 2500000] (imputed)	28448500
rs7903146	chr10	Body mass index (joint analysis main effects and physical activity interaction)	2e-09	rs7903146	None	None	2,518 African American women, 86,278 European ancestry women, 1,773 Filipino ancestry women, 1,030 Indian ancestry women, 1,457 African American men, 55,137 European ancestry men, 7,648 Indian ancestry men, 5,527 European ancestry individuals	10q25.2	TCF7L2	Affymetrix, Illumina, Perlegen [~ 2500000] (imputed)	28448500
rs7903146	chr10	Body mass index (joint analysis main effects and physical activity interaction)	2e-07	rs7903146	None	None	2,518 African American women, 86,278 European ancestry women, 1,773 Filipino ancestry women, 1,030 Indian ancestry women, 1,457 African American men, 55,137 European ancestry men, 7,648 Indian ancestry men, 5,527 European ancestry individuals	10q25.2	TCF7L2	Affymetrix, Illumina, Perlegen [~ 2500000] (imputed)	28448500
rs7903146	chr10	Body mass index	5e-08	rs7903146	None	0.7145	2,518 African American women, 86,278 European ancestry women, 1,773 Filipino ancestry women, 1,030 Indian ancestry women, 1,457 African American men, 55,137 European ancestry men, 7,648 Indian ancestry men, 5,527 European ancestry individuals	10q25.2	TCF7L2	Affymetrix, Illumina, Perlegen [~ 2500000] (imputed)	28448500
rs7903146	chr10	Body mass index	5e-10	rs7903146	None	0.7145	2,518 African American women, 86,278 European ancestry women, 1,773 Filipino ancestry women, 1,030 Indian ancestry women, 1,457 African American men, 55,137 European ancestry men, 7,648 Indian ancestry men, 5,527 European ancestry individuals	10q25.2	TCF7L2	Affymetrix, Illumina, Perlegen [~ 2500000] (imputed)	28448500
rs7903146	chr10	Body mass index (joint analysis main effects and smoking interaction)	6e-09	rs7903146	None	0.2894	98,173 European ancestry women, 64,373 European ancestry men, 5,829 European ancestry individuals, 10,500 African American/Afro-Caribbean ancestry women, 2,706 African American/Afro-Caribbean ancestry men, 1,030 Indian Asian ancestry women, 7,648 Indian Asian ancestry men, 1,793 Filipino ancestry women, 2,944 Hispanic/Latino ancestry women, 1,764 Hispanic/Latino ancestry men	10q25.2	TCF7L2	Affymetrix, Illumina, Perlegen [up to 2800000] (imputed)	28443625
rs7903146	chr10	Body mass index (joint analysis main effects and smoking interaction)	4e-08	rs7903146	None	0.2894	98,173 European ancestry women, 64,373 European ancestry men, 5,829 European ancestry individuals, 10,500 African American/Afro-Caribbean ancestry women, 2,706 African American/Afro-Caribbean ancestry men, 1,030 Indian Asian ancestry women, 7,648 Indian Asian ancestry men, 1,793 Filipino ancestry women, 2,944 Hispanic/Latino ancestry women, 1,764 Hispanic/Latino ancestry men	10q25.2	TCF7L2	Affymetrix, Illumina, Perlegen [up to 2800000] (imputed)	28443625
rs7903146	chr10	BMI in non-smokers	7e-09	rs7903146	None	0.2894	77,279 European ancestry women, 47,280 European ancestry men, 4,856 European ancestry individuals, 8,799 African American/Afro-Caribbean ancestry women, 1,803 African American/Afro-Caribbean ancestry men, 1,020 Indian Asian ancestry women, 6,691 Indian Asian ancestry men, 1,526 Filipino ancestry women, 2,469 Hispanic/Latino ancestry women, 1,318 Hispanic/Latino ancestry men	10q25.2	TCF7L2	Affymetrix, Illumina, Perlegen [up to 2800000] (imputed)	28443625
rs7903146	chr10	BMI in non-smokers	7e-10	rs7903146	None	0.2894	77,279 European ancestry women, 47,280 European ancestry men, 4,856 European ancestry individuals, 8,799 African American/Afro-Caribbean ancestry women, 1,803 African American/Afro-Caribbean ancestry men, 1,020 Indian Asian ancestry women, 6,691 Indian Asian ancestry men, 1,526 Filipino ancestry women, 2,469 Hispanic/Latino ancestry women, 1,318 Hispanic/Latino ancestry men	10q25.2	TCF7L2	Affymetrix, Illumina, Perlegen [up to 2800000] (imputed)	28443625
rs7903146	chr10	BMI (adjusted for smoking behaviour)	1e-07	rs7903146	None	0.2894	98,173 European ancestry women, 64,373 European ancestry men, 5,829 European ancestry individuals, 10,500 African American/Afro-Caribbean ancestry women, 2,706 African American/Afro-Caribbean ancestry men, 1,030 Indian Asian ancestry women, 7,648 Indian Asian ancestry men, 1,793 Filipino ancestry women, 2,944 Hispanic/Latino ancestry women, 1,764 Hispanic/Latino ancestry men	10q25.2	TCF7L2	Affymetrix, Illumina, Perlegen [up to 2800000] (imputed)	28443625
rs7903146	chr10	Type 2 diabetes	1e-11	rs7903146	None	0.25	2,499 Hispanic/Latino ancestry cases, 5,247 Hispanic/Latino ancestry controls	10q25.2	TCF7L2	Illumina [NR] (imputed)	28254843
rs7903146	chr10	Clinical laboratory measurements	6e-24	rs7903146	None		17,347 European ancestry individuals	10q25.2	TCF7L2	Illumina [629274]	27897004
rs7903146	chr10	Type 2 diabetes	7e-45	rs7903146	None	None	4,040 British ancestry cases, 113,735 British ancestry controls	10q25.2	TCF7L2	NR [9288881] (imputed)	26961502
rs7903146	chr10	Body mass index	3e-13	rs7903146	None	0.28797	up to 309,889 European ancestry individuals	10q25.2	None	Affymetrix, Illumina, Perlegen [up to 2800000] (imputed)	26426971
rs7903146	chr10	Body mass index	1e-12	rs7903146	None	0.713	up to 104,666 European ancestry male individuals, up to 132,115 European ancestry female individuals, 370 African American male individuals, 517 African American female individuals, 512 Hispanic male individuals, 764 Hispanic female individuals	10q25.2	TCF7L2	Affymetrix, Illumina [2550021]	25673413
rs7903146	chr10	Body mass index	1e-11	rs7903146	None	0.713	up to 104,666 European ancestry male individuals, up to 132,115 European ancestry female individuals, 370 African American male individuals, 517 African American female individuals, 512 Hispanic male individuals, 764 Hispanic female individuals	10q25.2	TCF7L2	Affymetrix, Illumina [2550021]	25673413
rs7903146	chr10	Body mass index	4e-11	rs7903146	None	0.712	up to 104,666 European ancestry male individuals, up to 132,115 European ancestry female individuals, 370 African American male individuals, 517 African American female individuals, 512 Hispanic male individuals, 764 Hispanic female individuals	10q25.2	TCF7L2	Affymetrix, Illumina [2550021]	25673413
rs7903146	chr10	Waist circumference	4e-09	rs7903146	None	0.2866	up to 56,910 European ancestry men, up to 86,570 European ancestry women	10q25.2	TCF7L2	Affymetrix, Illumina, Perlegen [up to 2542447] (imputed)	25673412
rs7903146	chr10	Waist circumference	3e-08	rs7903146	None	0.2866	up to 56,910 European ancestry men, up to 86,570 European ancestry women	10q25.2	TCF7L2	Affymetrix, Illumina, Perlegen [up to 2542447] (imputed)	25673412
rs7903146	chr10	Hip circumference	7e-08	rs7903146	None	0.2858	up to 56,910 European ancestry men, up to 86,570 European ancestry women	10q25.2	TCF7L2	Affymetrix, Illumina, Perlegen [up to 2542447] (imputed)	25673412
rs7903146	chr10	Hip circumference	3e-06	rs7903146	None	0.2858	up to 56,910 European ancestry men, up to 86,570 European ancestry women	10q25.2	TCF7L2	Affymetrix, Illumina, Perlegen [up to 2542447] (imputed)	25673412
rs7903146	chr10	Hip circumference	2e-11	rs7903146	None	0.2858	up to 56,910 European ancestry men, up to 86,570 European ancestry women	10q25.2	TCF7L2	Affymetrix, Illumina, Perlegen [up to 2542447] (imputed)	25673412
rs7903146	chr10	Type 2 diabetes	5e-44	rs7903146	None	0.3	8,284 African American cases, 15,543 African American controls	10q25.2	TCF7L2	Affymetrix, Illumina [2579389] (imputed)	25102180
rs7903146	chr10	Type 2 diabetes	4e-94	rs7903146	None	0.3	8,284 African American cases, 15,543 African American controls	10q25.2	TCF7L2	Affymetrix, Illumina [2579389] (imputed)	25102180
rs7903146	chr10	Type 2 diabetes	8e-75	rs7903146	None	0.3	12,171 European ancestry cases, 56,862 European ancestry controls, 6,952 East Asian ancestry cases, 11,865 East Asian ancestry controls, 5,561 South Asian ancestry cases, 14,458 South Asian ancestry controls, 1,804 Mexican ancestry cases, 779 Mexican ancestry controls	10q25.2	TCF7L2	Affymetrix, Illumina [2500000] (imputed)	24509480
rs7903146	chr10	Type 2 diabetes	1e-14	rs7903146	None	None	3,848 Mexican and other Latin American ancestry cases, 4,366 Mexican and other Latin American ancestry controls	10q25.2	TCF7L2	Illumina [9200000] (imputed)	24390345
rs7903146	chr10	Type 2 diabetes	2e-15	rs7903146	None	0.04	5,976 Japanese ancestry cases, 20,829 Japanese ancestry controls	10q25.2	TCF7L2	Illumina [6209637] (imputed)	23945395
rs7903146	chr10	Type 2 diabetes	9e-75	rs7903146	None	0.5	842 Punjabi Sikh ancestry cases, 774 Punjabi Sikh ancestry controls	10q25.2	TCF7L2	Illumina [1232008] (imputed)	23300278
rs7903146	chr10	Type 2 diabetes	6e-22	rs7903146	None	0.31	842 Punjabi Sikh ancestry cases, 774 Punjabi Sikh ancestry controls	10q25.2	TCF7L2	Illumina [1232008] (imputed)	23300278
rs7903146	chr10	Type 2 diabetes	3e-19	rs7903146	None	0.31	842 Punjabi Sikh ancestry cases, 774 Punjabi Sikh ancestry controls	10q25.2	TCF7L2	Illumina [1232008] (imputed)	23300278
rs7903146	chr10	Type 2 diabetes	3e-35	rs7903146	None	0.3	842 Punjabi Sikh ancestry cases, 774 Punjabi Sikh ancestry controls	10q25.2	TCF7L2	Illumina [1232008] (imputed)	23300278
rs7903146	chr10	Type 2 diabetes	2e-38	rs7903146	None	0.3	842 Punjabi Sikh ancestry cases, 774 Punjabi Sikh ancestry controls	10q25.2	TCF7L2	Illumina [1232008] (imputed)	23300278
rs7903146	chr10	Type 2 diabetes	1e-35	rs7903146	None	0.3	1,101 Indo-European ancestry cases, 1,027 Indo-European ancestry controls	10q25.2	TCF7L2	Illumina [536420]	23209189
rs7903146	chr10	Type 2 diabetes	6e-92	rs7903146	None	None	6,377 European ancestry male cases, 5,794 European ancestry female cases, 22,243 European ancestry male controls, 34,619 European ancestry female controls	10q25.2	TCF7L2	Affymetrix, Illumina [up to 2500000] (imputed)	22885922
rs7903146	chr10	Type 2 diabetes	4e-73	rs7903146	None	None	6,377 European ancestry male cases, 5,794 European ancestry female cases, 22,243 European ancestry male controls, 34,619 European ancestry female controls	10q25.2	TCF7L2	Affymetrix, Illumina [up to 2500000] (imputed)	22885922
rs7903146	chr10	Type 2 diabetes	1e-139	rs7903146	None	0.26838	6,377 European ancestry male cases, 5,794 European ancestry female cases, 22,243 European ancestry male controls, 34,619 European ancestry female controls	10q25.2	TCF7L2	Affymetrix, Illumina [up to 2500000] (imputed)	22885922
rs7903146	chr10	Type 2 diabetes	4e-21	rs7903146	None	0.29	2,112 lean type 2 diabetes cases, 4,123 obese type 2 diabetes cases, 54,412 controls	10q25.2	TCF7L2	NR [NR]	22693455
rs7903146	chr10	Type 2 diabetes	2e-40	rs7903146	None	0.29	2,112 lean type 2 diabetes cases, 4,123 obese type 2 diabetes cases, 54,412 controls	10q25.2	TCF7L2	NR [NR]	22693455
rs7903146	chr10	Fasting blood insulin (BMI interaction)	3e-06	rs7903146	None	0.2871	Up to 51,750 European ancestry individuals	10q25.2	TCF7L2	Affymetrix, Illumina [~ 2400000] (imputed)	22581228
rs7903146	chr10	Fasting blood insulin	3e-07	rs7903146	None	0.2724	Up to 51,750 European ancestry individuals	10q25.2	TCF7L2	Affymetrix, Illumina [~ 2400000] (imputed)	22581228
rs7903146	chr10	Fasting blood glucose (BMI interaction)	2e-14	rs7903146	None	0.2886	Up to 58,074 European ancestry individuals	10q25.2	TCF7L2	Affymetrix, Illumina [~ 2400000] (imputed)	22581228
rs7903146	chr10	Fasting blood glucose	1e-09	rs7903146	None	0.2876	Up to 58,074 European ancestry individuals	10q25.2	TCF7L2	Affymetrix, Illumina [~ 2400000] (imputed)	22581228
rs7903146	chr10	Type 2 diabetes	2e-15	rs7903146	None	0.26 (EA+AA)	2,413 European ancestry cases, 2,392 European ancestry controls, 810 African American cases, 873 African American controls	10q25.2	TCF7L2	Illumina [NR]	22101970
rs7903146	chr10	Proinsulin levels	2e-20	rs7903146	None	0.3	10,701 European ancestry individuals	10q25.2	TCF7L2	Affymetrix, Illumina [~ 2500000] (imputed)	21873549
rs7903146	chr10	Glycated hemoglobin levels	1e-07	rs7903146	None	0.72	1,782 European ancestry individuals	10q25.2	TCF7L2	Illumina [256587]	20849430
rs7903146	chr10	Metabolic syndrome	7e-07	rs7903146	None	0.3	2,554 Indian Asian ancestry individuals	10q25.2	TCF7L2	Illumina [308011]	20694148
rs7903146	chr10	Type 2 diabetes	2e-51	rs7903146	None		8,130 European ancestry cases, 38,987 European ancestry controls	10q25.2	TCF7L2	Affymetrix, Illumina [2426886] (imputed)	20581827
rs7903146	chr10	Type 2 diabetes	1e-30	rs7903146	None	0.27	679 European ancestry cases, 697 European ancestry controls	10q25.2	TCF7L2	Illumina [392365]	19734900
rs7903146	chr10	Type 2 diabetes	8e-12	rs7903146	None	0.04	519 Japanese ancestry cases, 503 Japanese ancestry controls	10q25.2	TCF7L2	Illumina [482625]	19401414
rs7903146	chr10	Type 2 diabetes	9e-30	rs7903146	None	None	958 European ancestry obese cases, 955 European ancestry non-obese cases, 2,938 European ancestry controls	10q25.2	TCF7L2	Affymetrix [393453]	19056611
rs7903146	chr10	Type 2 diabetes	6e-16	rs7903146	None	None	958 European ancestry obese cases, 955 European ancestry non-obese cases, 2,938 European ancestry controls	10q25.2	TCF7L2	Affymetrix [393453]	19056611
rs7903146	chr10	Type 2 diabetes	3e-23	rs7903146	None	None	4,549 European ancestry cases, 5,579 European ancestry controls	10q25.2	TCF7L2	Affymetrix, Illumina [2202892] (imputed)	18372903
rs7903146	chr10	Type 2 diabetes	5e-08	rs7903146	None	None	201 Finland founder cases, 200 Finland founder controls, 200 Ashkenazi Jewish cases, 197 Ashkenazi Jewish controls, 99 European ancestry cases, 100 European ancestry controls	10q25.2	TCF7L2	Illumina [315917]	17668382
rs7903146	chr10	Type 2 diabetes	1e-08	rs7903146	None	0.18	1,161 European ancestry cases, 1,174 European ancestry controls	10q25.2	TCF7L2	Illumina [315635]	17463248
rs7903146	chr10	Type 2 diabetes	1e-48	rs7903146	None	0.26	1,464 European ancestry cases, 1,467 European ancestry controls	10q25.2	TCF7L2	Affymetrix [386731]	17463246
rs7903146	chr10	Type 2 diabetes	2e-10	rs7903146	None	0.3	1,399 European ancestry cases, 5,275 European ancestry controls	10q25.2	TCF7L2	Illumina [at least 313179]	17460697
rs7903146	chr10	Type 2 diabetes	2e-34	rs7903146	None	0.3	661 European ancestry cases, 614 European ancestry controls	10q25.2	TCF7L2	Illumina [392935]	17293876
rs2237892	chr11	Type 2 diabetes	5e-07	rs2237892	None	0.62	14,026 Korean ancestry individuals	11p15.4	KCNQ1	Illumina [up to 242901]	32794382
rs2237892	chr11	Type 2 diabetes	9e-10	rs2237892	None	0.0624896	61,714 European ancestry cases, 1,178 Pakistani ancestry cases, 593,952 European ancestry controls, 2,472 Pakistani ancestry controls	11p15.4	KCNQ1	NR [5035015] (imputed)	30054458
rs2237892	chr11	Type 2 diabetes	2e-63	rs2237892	None	0.0626	6,353 South Asian ancestry cases, 7,179 South Asian ancestry controls, 3,871 European ancestry cases, 16,427 European ancestry controls, 34,840 cases, 114,981 controls	11p15.4	KCNQ1	Affymetrix, Illumina [NR] (imputed)	28869590
rs2237892	chr11	Type 2 diabetes	1e-09	rs2237892	None	0.0626	6,353 South Asian ancestry cases, 7,179 South Asian ancestry controls, 3,871 European ancestry cases, 16,427 European ancestry controls, 34,840 cases, 114,981 controls	11p15.4	KCNQ1	Affymetrix, Illumina [NR] (imputed)	28869590
rs2237892	chr11	Body mass index	9e-13	rs2237892	None	0.36	82,438 East Asian ancestry individuals, 4,301 South East Asian ancestry individuals	11p15.4	KCNQ1	Affymetrix, Illumina [~ 2500000] (imputed)	24861553
rs2237892	chr11	Type 2 diabetes	4e-29	rs2237892	None	0.61	5,976 Japanese ancestry cases, 20,829 Japanese ancestry controls	11p15.4	KCNQ1	Illumina [6209637] (imputed)	23945395
rs2237892	chr11	Type 2 diabetes	1e-07	rs2237892	None	0.657	1,839 Han Chinese ancestry cases, 1,873 Han Chinese ancestry controls	11p15.4	KCNQ1	Illumina [2234194] (imputed)	22961080
rs2237892	chr11	Type 2 diabetes	4e-06	rs2237892	None	None	1,804 Hispanic cases, 780 Hispanic controls	11p15.4	KCNQ1	Affymetrix [315658]	21573907
rs2237892	chr11	Type 2 diabetes	1e-26	rs2237892	None	0.59	519 Japanese ancestry cases, 503 Japanese ancestry controls	11p15.4	KCNQ1	Illumina [482625]	19401414
rs2237892	chr11	Type 2 diabetes	2e-42	rs2237892	None	0.61	187 Japanese ancestry cases, 1,504 Japanese ancestry controls	11p15.4	KCNQ1	NR [82343]	18711367
rs163184	chr11	Type 2 diabetes	5e-14	rs163184	None	0.493	6,353 South Asian ancestry cases, 7,179 South Asian ancestry controls, 3,871 European ancestry cases, 16,427 European ancestry controls, 34,840 cases, 114,981 controls	11p15.4	intergenic	Affymetrix, Illumina [NR] (imputed)	28869590
rs163184	chr11	Type 2 diabetes	1e-07	rs163184	None	0.41	2,499 Hispanic/Latino ancestry cases, 5,247 Hispanic/Latino ancestry controls	11p15.4	KCNQ1	Illumina [NR] (imputed)	28254843
rs163184	chr11	Type 2 diabetes	3e-06	rs163184	None	None	4,040 British ancestry cases, 113,735 British ancestry controls	11p15.4	KCNQ1	NR [9288881] (imputed)	26961502
rs163184	chr11	Type 2 diabetes	2e-14	rs163184	None	0.5	12,171 European ancestry cases, 56,862 European ancestry controls, 6,952 East Asian ancestry cases, 11,865 East Asian ancestry controls, 5,561 South Asian ancestry cases, 14,458 South Asian ancestry controls, 1,804 Mexican ancestry cases, 779 Mexican ancestry controls	11p15.4	KCNQ1	Affymetrix, Illumina [2500000] (imputed)	24509480
rs163184	chr11	Type 2 diabetes	9e-15	rs163184	None	None	6,377 European ancestry male cases, 5,794 European ancestry female cases, 22,243 European ancestry male controls, 34,619 European ancestry female controls	11p15.4	KCNQ1	Affymetrix, Illumina [up to 2500000] (imputed)	22885922
rs163184	chr11	Type 2 diabetes	1e-11	rs163184	None	0.49816	6,377 European ancestry male cases, 5,794 European ancestry female cases, 22,243 European ancestry male controls, 34,619 European ancestry female controls	11p15.4	KCNQ1	Affymetrix, Illumina [up to 2500000] (imputed)	22885922
rs5219	chr11	Type 2 diabetes	3e-48	rs5219	None	0.6272	148,726 European ancestry cases, 965,732 European ancestry controls	11p15.1	None	Affymetrix, Illumina [1198787] (imputed)	32541925
rs5219	chr11	Type 2 diabetes	4e-06	rs5219	None	0.37	36,614 Japanese ancestry cases, 155,150 Japanese ancestry controls	11p15.1	KCNJ11	Illumina [12557761] (imputed)	30718926
rs5219	chr11	Type 2 diabetes (adjusted for BMI)	2e-22	rs5219	None	0.364	48,286 European ancestry cases, 250,671 European ancestry controls, 33,126 African American, East Asian, Hispanic/Latino or South Asian cases, 120,161 African American, East Asian, Hispanic/Latino or South Asian controls	11p15.1	KCNJ11	Affymetrix, Illumina [247470]	29632382
rs5219	chr11	Type 2 diabetes	6e-22	rs5219	None	0.364	48,286 European ancestry cases, 250,671 European ancestry controls, 33,126 African American, East Asian, Hispanic/Latino or South Asian cases, 120,161 African American, East Asian, Hispanic/Latino or South Asian controls	11p15.1	KCNJ11	Affymetrix, Illumina [247470]	29632382
rs5219	chr11	Body mass index	4e-10	rs5219	None	0.6378	up to 449,889 European ancestry individuals, up to 29,398 South Asian ancestry individuals, up to 27,610 African American individuals, up to 8,839 East Asian individuals, up to 10,772 Hispanic ancestry individuals	11p15.1	KCNJ11	Illumina [246328]	29273807
rs5219	chr11	Systolic blood pressure	5e-12	rs5219	None	0.32	120,473 European ancestry individuals, 21,503 African American individuals, 4,586 Hispanic individuals	11p15.1	KCNJ11	Illumina [247039]	27618448
rs5219	chr11	Pulse pressure	3e-07	rs5219	None	0.365	120,473 European ancestry individuals, 21,503 African American individuals, 4,586 Hispanic individuals	11p15.1	KCNJ11	Illumina [247039]	27618448
rs5219	chr11	Mean arterial pressure	4e-09	rs5219	None	0.319523	120,473 European ancestry individuals, 21,503 African American individuals, 4,586 Hispanic individuals	11p15.1	KCNJ11, ABCC8	Illumina [247039]	27618448
rs5219	chr11	Type 2 diabetes	5e-07	rs5219	None	None	958 European ancestry obese cases, 955 European ancestry non-obese cases, 2,938 European ancestry controls	11p15.1	KCNJ11	Affymetrix [393453]	19056611
rs5219	chr11	Type 2 diabetes	1e-09	rs5219	None	None	958 European ancestry obese cases, 955 European ancestry non-obese cases, 2,938 European ancestry controls	11p15.1	KCNJ11	Affymetrix [393453]	19056611
rs5219	chr11	Type 2 diabetes	7e-11	rs5219	None	0.46	1,161 European ancestry cases, 1,174 European ancestry controls	11p15.1	KCNJ11	Illumina [315635]	17463248
rs5219	chr11	Type 2 diabetes	7e-11	rs5219	None	0.47	1,464 European ancestry cases, 1,467 European ancestry controls	11p15.1	KCNJ11	Affymetrix [386731]	17463246
rs11605924	chr11	Glycemic traits (pleiotropy)	4e-10	rs11605924	None	None	46,186 European ancestry individuals	11p11.2	CRY2	NR [NR]	31021400
rs11605924	chr11	Fasting blood glucose (BMI interaction)	4e-15	rs11605924	None	0.4858	Up to 58,074 European ancestry individuals	11p11.2	CRY2	Affymetrix, Illumina [~ 2400000] (imputed)	22581228
rs11605924	chr11	Fasting blood glucose	3e-13	rs11605924	None	0.489	Up to 58,074 European ancestry individuals	11p11.2	CRY2	Affymetrix, Illumina [~ 2400000] (imputed)	22581228
rs11605924	chr11	Fasting blood glucose	1e-14	rs11605924	None	0.49	46,186 European ancestry individuals	11p11.2	CRY2	Affymetrix, Illumina [~ 2500000] (imputed)	20081858
rs7944584	chr11	Fasting blood glucose	5e-12	rs7944584	None	0.238512	50,900 European ancestry non-diabetic individuals, 9,664 African American non-diabetic individuals	11p11.2	MADD	Illumina [197481]	25631608
rs7944584	chr11	Fasting blood proinsulin levels	5e-25	rs7944584	None	0.181	up to 8,229 Finnish ancestry non-diabetic individuals	11p11.2	MADD	Illumina [242071]	23263489
rs7944584	chr11	Fasting blood glucose (BMI interaction)	4e-12	rs7944584	None	0.7264	Up to 58,074 European ancestry individuals	11p11.2	MADD	Affymetrix, Illumina [~ 2400000] (imputed)	22581228
rs7944584	chr11	Fasting blood glucose	4e-13	rs7944584	None	0.7262	Up to 58,074 European ancestry individuals	11p11.2	MADD	Affymetrix, Illumina [~ 2400000] (imputed)	22581228
rs7944584	chr11	Fasting blood glucose	2e-18	rs7944584	None	0.75	46,186 European ancestry individuals	11p11.2	MADD	Affymetrix, Illumina [~ 2500000] (imputed)	20081858
rs174550	chr11	Metabolite levels	1e-40	rs174550	None	None	2,076 European ancestry individuals	11q12.2	FEN1	Affymetrix [at least 2500000] (imputed)	23823483
rs174550	chr11	Metabolite levels	1e-13	rs174550	None	None	2,076 European ancestry individuals	11q12.2	FEN1	Affymetrix [at least 2500000] (imputed)	23823483
rs174550	chr11	Fasting blood glucose (BMI interaction)	2e-09	rs174550	None	0.6571	Up to 58,074 European ancestry individuals	11q12.2	FADS1	Affymetrix, Illumina [~ 2400000] (imputed)	22581228
rs174550	chr11	Fasting blood glucose	2e-10	rs174550	None	0.649	Up to 58,074 European ancestry individuals	11q12.2	FADS1	Affymetrix, Illumina [~ 2400000] (imputed)	22581228
rs174550	chr11	Plasma omega-3 polyunsaturated fatty acid level (eicosapentaenoic acid)	1e-57	rs174550	None	None	8,866 European ancestry individuals	11q12.2	FADS1	Affymetrix, Illumina [NR]	21829377
rs174550	chr11	Homeostasis model assessment of beta-cell function	5e-13	rs174550	None	0.64	36,466 European ancestry individuals	11q12.2	FADS1	Affymetrix, Illumina [~ 2500000] (imputed)	20081858
rs174550	chr11	Fasting blood glucose	2e-15	rs174550	None	0.64	46,186 European ancestry individuals	11q12.2	FADS1	Affymetrix, Illumina [~ 2500000] (imputed)	20081858
rs174550	chr11	Fasting blood glucose	5e-06	rs174550	None	None	6,457 African American individuals, 13,556 Hispanic/Latino individuals, 1,918 Asian ancestry individuals, 1,400 Native Hawaiian ancestry individuals, 412 Native American ancestry individuals, 168 individuals	11q12.2	None	Illumina [29713514] (imputed)	31217584
rs174550	chr11	Triglycerides	3e-52	rs174550	None	None	76,627 European ancestry individuals, 7,795 Hispanic individuals, 6,855 East Asian ancestry individuals, 2,958 African American individuals, 439 South Asian ancestry individuals	11q12.2	None	Affymetrix [at least 7091467] (imputed)	29507422
rs174550	chr11	Triglycerides	3e-41	rs174550	None	0.668	76,627 European ancestry individuals, 7,795 Hispanic individuals, 6,855 East Asian ancestry individuals, 2,958 African American individuals, 439 South Asian ancestry individuals	11q12.2	None	Affymetrix [at least 7091467] (imputed)	29507422
rs174550	chr11	Triglycerides	1e-06	rs174550	None	0.505	76,627 European ancestry individuals, 7,795 Hispanic individuals, 6,855 East Asian ancestry individuals, 2,958 African American individuals, 439 South Asian ancestry individuals	11q12.2	None	Affymetrix [at least 7091467] (imputed)	29507422
rs174550	chr11	Triglycerides	7e-06	rs174550	None	0.379	76,627 European ancestry individuals, 7,795 Hispanic individuals, 6,855 East Asian ancestry individuals, 2,958 African American individuals, 439 South Asian ancestry individuals	11q12.2	None	Affymetrix [at least 7091467] (imputed)	29507422
rs174550	chr11	Total cholesterol levels	1e-27	rs174550	None	None	76,627 European ancestry individuals, 7,795 Hispanic individuals, 6,855 East Asian ancestry individuals, 2,958 African American individuals, 439 South Asian ancestry individuals	11q12.2	None	Affymetrix [at least 7091467] (imputed)	29507422
rs174550	chr11	Total cholesterol levels	6e-25	rs174550	None	0.668	76,627 European ancestry individuals, 7,795 Hispanic individuals, 6,855 East Asian ancestry individuals, 2,958 African American individuals, 439 South Asian ancestry individuals	11q12.2	None	Affymetrix [at least 7091467] (imputed)	29507422
rs174550	chr11	Low density lipoprotein cholesterol levels	1e-57	rs174550	None	None	76,627 European ancestry individuals, 7,795 Hispanic individuals, 6,855 East Asian ancestry individuals, 2,958 African American individuals, 439 South Asian ancestry individuals	11q12.2	None	Affymetrix [at least 7091467] (imputed)	29507422
rs174550	chr11	Low density lipoprotein cholesterol levels	7e-49	rs174550	None	0.668	76,627 European ancestry individuals, 7,795 Hispanic individuals, 6,855 East Asian ancestry individuals, 2,958 African American individuals, 439 South Asian ancestry individuals	11q12.2	None	Affymetrix [at least 7091467] (imputed)	29507422
rs174550	chr11	Low density lipoprotein cholesterol levels	2e-06	rs174550	None	0.505	76,627 European ancestry individuals, 7,795 Hispanic individuals, 6,855 East Asian ancestry individuals, 2,958 African American individuals, 439 South Asian ancestry individuals	11q12.2	None	Affymetrix [at least 7091467] (imputed)	29507422
rs174550	chr11	High density lipoprotein cholesterol levels	5e-12	rs174550	None	None	76,627 European ancestry individuals, 7,795 Hispanic individuals, 6,855 East Asian ancestry individuals, 2,958 African American individuals, 439 South Asian ancestry individuals	11q12.2	None	Affymetrix [at least 7091467] (imputed)	29507422
rs174550	chr11	High density lipoprotein cholesterol levels	4e-11	rs174550	None	0.668	76,627 European ancestry individuals, 7,795 Hispanic individuals, 6,855 East Asian ancestry individuals, 2,958 African American individuals, 439 South Asian ancestry individuals	11q12.2	None	Affymetrix [at least 7091467] (imputed)	29507422
rs174550	chr11	Triglyceride levels	3e-41	rs174550	None	0.643	28,183 East Asian ancestry individuals, 177,861 European ancestry individuals	11q12.2	FADS1, FADS2, FADS3	Affymetrix, Illumina [up to 1900000] (imputed)	28334899
rs174550	chr11	HDL cholesterol levels	6e-30	rs174550	None	0.642	34,930 East Asian ancestry individuals, 187,167 European ancestry individuals	11q12.2	FADS1, FADS2, FADS3	Affymetrix, Illumina [~ 1900000] (imputed)	28334899
rs174550	chr11	Glycerophospholipid levels	4e-33	rs174550	None	0.6772	up to 7,478 European ancestry individuals	11q12.2	FADS1, FADS2, FADS3	Affymetrix, Illumina [at least 296619] (imputed)	26068415
rs174550	chr11	Trans fatty acid levels	6e-14	rs174550	None	0.6687	8,013 European ancestry individuals	11q12.2	None	Affymetrix, Illumina [~ 2500000] (imputed)	25646338
rs174550	chr11	Fasting blood glucose	2e-09	rs174550	None	0.296352	50,900 European ancestry non-diabetic individuals, 9,664 African American non-diabetic individuals	11q12.2	FADS1	Illumina [197481]	25631608
rs174550	chr11	Red blood cell fatty acid levels	6e-43	rs174550	None	0.33	2,633 individuals	11q12.2	FADS1, FADS2, C11orf10, C11orf9, FEN1, RAB3IL1	Affymetrix [~ 2500000] (imputed)	25500335
rs174550	chr11	Plasma omega-6 polyunsaturated fatty acid levels (linoleic acid)	4e-274	rs174550	None	0.676	8,631 European ancestry individuals	11q12.2	FTH1, INCENP, FADS1, FADS2, SCGB1D1, SCGB2A1, C11orf9, DAGLA, FEN1, RAB3IL, C11orf10, FADS3, SYT7, BEST1, SCGB1D2	Affymetrix, Illumina [~ 2500000] (imputed)	24823311
rs174550	chr11	Plasma omega-6 polyunsaturated fatty acid levels (adrenic acid)	4e-140	rs174550	None	0.674	8,631 European ancestry individuals	11q12.2	C11orf9, FADS1, FADS2, DAGLA, FEN1, C11orf10, FADS3, RAB3IL1, BEST1	Affymetrix, Illumina [~ 2500000] (imputed)	24823311
rs174550	chr11	Blood metabolite levels	7e-24	rs174550	None	0.67	7,824 European ancestry individuals	11q12.2	FADS1	Affymetrix, Illumina [2100000] (imputed)	24816252
rs174550	chr11	Metabolite levels	5e-08	rs174550	None	None	2,076 European ancestry individuals	11q12.2	FEN1	Affymetrix [at least 2500000] (imputed)	23823483
rs10830963	chr11	Type 2 diabetes	5e-68	rs10830963	None	0.2781	148,726 European ancestry cases, 965,732 European ancestry controls	11q14.3	None	Affymetrix, Illumina [1198787] (imputed)	32541925
rs10830963	chr11	Type 2 diabetes	1e-66	rs10830963	None	0.3057	148,726 European ancestry cases, 24,646 African American cases, 8,616 Hispanic cases, 46,511 Asian ancestry cases, 965,732 European ancestry controls, 31,446 African American controls, 11,829 Hispanic controls, 169,776 Asian ancestry controls	11q14.3	None	Affymetrix, Illumina [at least 945603] (imputed)	32541925
rs10830963	chr11	Type 2 diabetes	4e-08	rs10830963	None	0.421	77,418 East Asian cases, 356,122 East Asian controls	11q14.3	MTNR1B	Affymetrix, Illumina [11800000] (imputed)	32499647
rs10830963	chr11	High fasting blood glucose	8e-14	rs10830963	None	0.409	7,423 Korean ancestry cases and controls	11q14.3	MTNR1B	Affymetrix [at least 584061] (imputed)	31910446
rs10830963	chr11	Serum metabolite levels (CMS)	9e-15	rs10830963	None	None	6,263 Finnish ancestry men	11q14.3	MTNR1B	Illumina [609262]	31636271
rs10830963	chr11	Serum metabolite levels	1e-10	rs10830963	None	None	6,263 Finnish ancestry men	11q14.3	MTNR1B	Illumina [609262]	31636271
rs10830963	chr11	Fasting blood glucose	9e-32	rs10830963	None	None	6,457 African American individuals, 13,556 Hispanic/Latino individuals, 1,918 Asian ancestry individuals, 1,400 Native Hawaiian ancestry individuals, 412 Native American ancestry individuals, 168 individuals	11q14.3	None	Illumina [29713514] (imputed)	31217584
rs10830963	chr11	Glycemic traits (pleiotropy)	6e-74	rs10830963	None	None	46,186 European ancestry individuals	11q14.3	MTNR1B	NR [NR]	31021400
rs10830963	chr11	Type 2 diabetes	2e-16	rs10830963	None	None	approximately 459,000 European ancestry individuals	11q14.3		NR [~ 8900000] (imputed)	30595370
rs10830963	chr11	Type 2 diabetes	5e-43	rs10830963	None	0.2765	74,124 European ancestry cases, 824,006 European ancestry controls	11q14.3	MTNR1B	Affymetrix, Illumina [~ 27000000] (imputed)	30297969
rs10830963	chr11	Pulse pressure	6e-13	rs10830963	None	0.7214	757,601 European ancestry individuals	11q14.3	MTNR1B	Affymetrix, Illumina [~ 7100000] (imputed)	30224653
rs10830963	chr11	Type 2 diabetes	6e-30	rs10830963	None	0.275768	61,714 European ancestry cases, 1,178 Pakistani ancestry cases, 593,952 European ancestry controls, 2,472 Pakistani ancestry controls	11q14.3	MTNR1B	NR [5035015] (imputed)	30054458
rs10830963	chr11	Fasting blood glucose	3e-07	rs10830963	None	0.28	7,647 European ancestry individuals, 2,104 Black individuals	11q14.3	MTNR1B	Affymetrix [NR] (imputed)	29844224
rs10830963	chr11	Glycemic traits (multi-trait analysis)	6e-26	rs10830963	None	None	5,947 European ancestry individuals	11q14.3	None	NR [~ 2500000] (imputed)	29743933
rs10830963	chr11	Hemoglobin A1c levels	1e-08	rs10830963	None	None	42,790 Japanese ancestry individuals	11q14.3	MTNR1B	Illumina [6108953] (imputed)	29403010
rs10830963	chr11	Offspring birth weight	1e-19	rs10830963	None	0.29	68,258 European ancestry women	11q14.3	MTNR1B	Affymetrix, Illumina, Perlegen [up to 8741107] (imputed)	29309628
rs10830963	chr11	Glycated hemoglobin levels	2e-23	rs10830963	None	0.2938	88,355 European ancestry individuals	11q14.3	MTNR1B	Affymetrix, Illumina, Perlegen [~ 2500000] (imputed)	28898252
rs10830963	chr11	Glycated hemoglobin levels	7e-09	rs10830963	None	0.4542	18,472 East Asian ancestry individuals	11q14.3	MTNR1B	Affymetrix, Illumina, Perlegen [~ 2500000] (imputed)	28898252
rs10830963	chr11	Type 2 diabetes	4e-18	rs10830963	None	0.2883	6,353 South Asian ancestry cases, 7,179 South Asian ancestry controls, 3,871 European ancestry cases, 16,427 European ancestry controls, 34,840 cases, 114,981 controls	11q14.3	MTNR1B	Affymetrix, Illumina [NR] (imputed)	28869590
rs10830963	chr11	Type 2 diabetes	3e-16	rs10830963	None	0.2883	6,353 South Asian ancestry cases, 7,179 South Asian ancestry controls, 3,871 European ancestry cases, 16,427 European ancestry controls, 34,840 cases, 114,981 controls	11q14.3	MTNR1B	Affymetrix, Illumina [NR] (imputed)	28869590
rs10830963	chr11	Peak insulin response	1e-24	rs10830963	None		2,337 Hispanic individuals, 2,159 European ancestry individuals, 332 Pima Indian ancestry individuals	11q14.3	MTNR1B	Affymetrix, Illumina [~ 39000000] (imputed)	28490609
rs10830963	chr11	Insulin secretion rate	9e-08	rs10830963	None		527 European ancestry individuals	11q14.3	MTNR1B	Affymetrix, Illumina [~ 39000000] (imputed)	28490609
rs10830963	chr11	Insulin disposition index	3e-17	rs10830963	None	None	2,345 Hispanic individuals, 2,042 European ancestry individuals, 332 Pima Indian ancestry individuals	11q14.3	MTNR1B	Affymetrix, Illumina [~ 39000000] (imputed)	28490609
rs10830963	chr11	Acute insulin response	4e-21	rs10830963	None		2,346 Hispanic individuals, 2,087 European ancestry individuals, 332 Pima Indian ancestry individuals	11q14.3	MTNR1B	Affymetrix, Illumina [~ 39000000] (imputed)	28490609
rs10830963	chr11	Type 2 diabetes	2e-07	rs10830963	None	0.2	2,499 Hispanic/Latino ancestry cases, 5,247 Hispanic/Latino ancestry controls	11q14.3	MTNR1B	Illumina [NR] (imputed)	28254843
rs10830963	chr11	Birth weight	1e-07	rs10830963	None	0.27	133,903 European ancestry individuals, 6,635 African American individuals, 420 Turkish ancestry individuals, 365 Moroccan ancestry individuals, 395 Surinamese ancestry individuals, 840 Chinese ancestry individuals.	11q14.3	MTNR1B	Affymetrix, Illumina [at least 22434434] (imputed)	27680694
rs10830963	chr11	Fasting blood glucose	5e-89	rs10830963	None	0.240007	50,900 European ancestry non-diabetic individuals, 9,664 African American non-diabetic individuals	11q14.3	MTNR1B	Illumina [197481]	25631608
rs10830963	chr11	Fasting blood glucose	1e-06	rs10830963	None	0.0720163	50,900 European ancestry non-diabetic individuals, 9,664 African American non-diabetic individuals	11q14.3	MTNR1B	Illumina [197481]	25631608
rs10830963	chr11	Glucose homeostasis traits	1e-11	rs10830963	None		up to 4,176 Mexican American individuals	11q14.3	MTNR1B	Illumina [693128]	25524916
rs10830963	chr11	Glucose homeostasis traits	5e-12	rs10830963	None		up to 4,176 Mexican American individuals	11q14.3	FAT3, MTNR1B	Illumina [693128]	25524916
rs10830963	chr11	Insulin levels adjusted for BMI	3e-14	rs10830963	None	0.69	up to 4,409 European individuals, up to 411 Old Order Amish (founder/genetic isolate) individuals	11q14.3	MTNR1B	Affymetrix, Illumina [at least 1961018] (imputed)	24699409
rs10830963	chr11	Insulin levels	2e-07	rs10830963	None	0.69	up to 4,483 European individuals, up to 441 Old Order Amish (founder/genetic isolate) individuals	11q14.3	MTNR1B	Affymetrix, Illumina [at least 1961018] (imputed)	24699409
rs10830963	chr11	Insulin disposition index	1e-31	rs10830963	None	0.69	up to 4,746 European individuals, up to 412 Old Order Amish (founder/genetic isolate) individuals	11q14.3	MTNR1B	Affymetrix, Illumina [at least 1961018] (imputed)	24699409
rs10830963	chr11	Incremental insulin	3e-08	rs10830963	None	0.69	up to 4,447 European individuals, up to 411 Old Order Amish (founder/genetic isolate) individuals	11q14.3	MTNR1B	NR [at least 1961018] (imputed)	24699409
rs10830963	chr11	Corrected insulin response adjusted for insulin sensitivity index	4e-30	rs10830963	None	0.69	up to 4,565 European individuals, up to 413 Old Order Amish (founder/genetic isolate) individuals	11q14.3	MTNR1B	Affymetrix, Illumina [at least 1961018] (imputed)	24699409
rs10830963	chr11	Corrected insulin response	7e-28	rs10830963	None	0.69	up to 4,961 European individuals, up to 411 Old Order Amish (founder/genetic isolate) individuals	11q14.3	MTNR1B	Affymetrix, Illumina [at least 1961018] (imputed)	24699409
rs10830963	chr11	Type 2 diabetes	2e-07	rs10830963	None	0.27	12,171 European ancestry cases, 56,862 European ancestry controls, 6,952 East Asian ancestry cases, 11,865 East Asian ancestry controls, 5,561 South Asian ancestry cases, 14,458 South Asian ancestry controls, 1,804 Mexican ancestry cases, 779 Mexican ancestry controls	11q14.3	MTNR1B	Affymetrix, Illumina [2500000] (imputed)	24509480
rs10830963	chr11	Obesity-related traits	4e-08	rs10830963	None	0.205	815 Hispanic children from 263 families	11q14.3	MTNR1B, LOC642791	Illumina [899892]	23251661
rs10830963	chr11	Type 2 diabetes	3e-10	rs10830963	None	None	6,377 European ancestry male cases, 5,794 European ancestry female cases, 22,243 European ancestry male controls, 34,619 European ancestry female controls	11q14.3	MTNR1B	Affymetrix, Illumina [up to 2500000] (imputed)	22885922
rs10830963	chr11	Type 2 diabetes	5e-13	rs10830963	None	0.306096	6,377 European ancestry male cases, 5,794 European ancestry female cases, 22,243 European ancestry male controls, 34,619 European ancestry female controls	11q14.3	MTNR1B	Affymetrix, Illumina [up to 2500000] (imputed)	22885922
rs10830963	chr11	Fasting blood glucose (BMI interaction)	4e-105	rs10830963	None	0.7094	Up to 58,074 European ancestry individuals	11q14.3	MTNR1B	Affymetrix, Illumina [~ 2400000] (imputed)	22581228
rs10830963	chr11	Fasting blood glucose	2e-100	rs10830963	None	0.7055	Up to 58,074 European ancestry individuals	11q14.3	MTNR1B	Affymetrix, Illumina [~ 2400000] (imputed)	22581228
rs10830963	chr11	Fasting plasma glucose	1e-12	rs10830963	None	0.27	2,349 European ancestry individuals, 664 Chinese ancestry individuals, 1,366 African American individuals, 1,171 Hispanic individuals	11q14.3	MTNR1B	Affymetrix [NR] (imputed)	22508271
rs10830963	chr11	Metabolite levels	3e-11	rs10830963	None	None	8,330 European ancestry individuals	11q14.3	MTNR1B	Illumina [~ 7700000] (imputed)	22286219
rs10830963	chr11	Homeostasis model assessment of beta-cell function	3e-43	rs10830963	None	0.3	36,466 European ancestry individuals	11q14.3	MTNR1B	Affymetrix, Illumina [~ 2500000] (imputed)	20081858
rs10830963	chr11	Fasting blood glucose	6e-175	rs10830963	None	0.3	46,186 European ancestry individuals	11q14.3	MTNR1B	Affymetrix, Illumina [~ 2500000] (imputed)	20081858
rs10830963	chr11	Fasting plasma glucose	3e-50	rs10830963	None	0.28	35,812 European ancestry individuals	11q14.3	MTNR1B	Affymetrix, Illumina, Perlegen [up to 2557249] (imputed)	19060907
rs7957197	chr12	Type 2 diabetes	3e-09	rs7957197	None	0.1988	6,353 South Asian ancestry cases, 7,179 South Asian ancestry controls, 3,871 European ancestry cases, 16,427 European ancestry controls, 34,840 cases, 114,981 controls	12q24.31	HNF1A	Affymetrix, Illumina [NR] (imputed)	28869590
rs7957197	chr12	Type 2 diabetes	1e-09	rs7957197	None	0.1988	6,353 South Asian ancestry cases, 7,179 South Asian ancestry controls, 3,871 European ancestry cases, 16,427 European ancestry controls, 34,840 cases, 114,981 controls	12q24.31	HNF1A	Affymetrix, Illumina [NR] (imputed)	28869590
rs7957197	chr12	Type 2 diabetes	2e-08	rs7957197	None		8,130 European ancestry cases, 38,987 European ancestry controls	12q24.31	HNF1A	Affymetrix, Illumina [2426886] (imputed)	20581827
rs1436953	chr15	Type 2 diabetes	8e-06	rs1436953	None	0.64	793 Han Chinese ancestry cases, 806 Han Chinese ancestry controls	15q22.2	C2CD4B, C2CD4A	Illumina [474515]	21799836
rs7178572	chr15	Type 2 diabetes	2e-11	rs7178572	None	0.7	12,171 European ancestry cases, 56,862 European ancestry controls, 6,952 East Asian ancestry cases, 11,865 East Asian ancestry controls, 5,561 South Asian ancestry cases, 14,458 South Asian ancestry controls, 1,804 Mexican ancestry cases, 779 Mexican ancestry controls	15q24.3	HMG20A	Affymetrix, Illumina [2500000] (imputed)	24509480
rs7178572	chr15	Type 2 diabetes	1e-08	rs7178572	None	0.7	2,112 lean type 2 diabetes cases, 4,123 obese type 2 diabetes cases, 54,412 controls	15q24.3	HMG20A	NR [NR]	22693455
rs7178572	chr15	Type 2 diabetes	7e-11	rs7178572	None	0.52	5,561 South Asian ancestry cases, 14,458 South Asian ancestry controls	15q24.3	HMG20A	Illumina [568976]	21874001
rs7178572	chr15	Type 2 diabetes	2e-08	rs7178572	None	0.6928	6,353 South Asian ancestry cases, 7,179 South Asian ancestry controls, 3,871 European ancestry cases, 16,427 European ancestry controls, 34,840 cases, 114,981 controls	15q24.3	HMG20A	Affymetrix, Illumina [NR] (imputed)	28869590
rs7178572	chr15	Type 2 diabetes	6e-07	rs7178572	None	0.4836	6,353 South Asian ancestry cases, 7,179 South Asian ancestry controls, 3,871 European ancestry cases, 16,427 European ancestry controls, 34,840 cases, 114,981 controls	15q24.3	HMG20A	Affymetrix, Illumina [NR] (imputed)	28869590
rs7178572	chr15	Type 2 diabetes	1e-17	rs7178572	None	0.4836	6,353 South Asian ancestry cases, 7,179 South Asian ancestry controls, 3,871 European ancestry cases, 16,427 European ancestry controls, 34,840 cases, 114,981 controls	15q24.3	HMG20A	Affymetrix, Illumina [NR] (imputed)	28869590
rs7202116	chr16	Body mass index	1e-15	rs7202116	None	None	17,127 African American individuals, 21,955 Hispanic/Latino individuals, 4,647 Asian ancestry individuals, 3,936 Native Hawaiian ancestry individuals, 645 Native American ancestry individuals, 1,025 individuals	16q12.2	None	Illumina [32062178] (imputed)	31217584
rs7202116	chr16	Body mass index	2e-10	rs7202116	None	0.402	133,154 European ancestry individuals	16q12.2	FTO	Affymetrix, Illumina, Perlegen [~ 2440000] (imputed)	22982992
rs16955379	chr16	Type 2 diabetes	3e-07	rs16955379	None	0.8	5,999 East Asian ancestry cases, 9,001 East Asian ancestry controls, 794 Malay ancestry cases, 1,240 Malay ancestry controls, 159 Filipino ancestry cases, 1,624 Filipino ancestry controls	16q23.2	CMIP	Affymetrix, Illumina [2626356] (imputed)	22158537
rs4430796	chr17	Prostate cancer	5e-27	rs4430796	None	0.648	5,088 Japanese ancestry cases, 10,682 Japanese ancestry controls	17q12	HNF1B	Illumina [7742602] (imputed)	31562322
rs4430796	chr17	Prostate cancer	1e-132	rs4430796	None	0.53	79,148 European ancestry cases, 61,106 European ancestry controls	17q12	None	Illumina [20370935] (imputed)	29892016
rs4430796	chr17	Type 2 diabetes	3e-15	rs4430796	None	0.5249	6,353 South Asian ancestry cases, 7,179 South Asian ancestry controls, 3,871 European ancestry cases, 16,427 European ancestry controls, 34,840 cases, 114,981 controls	17q12	HNF1B	Affymetrix, Illumina [NR] (imputed)	28869590
rs4430796	chr17	Prostate cancer	6e-08	rs4430796	None	None	3,000 East Asian ancestry cases, 4,394 East Asian ancestry controls	17q12	HNF1B	Illumina [4550396] (imputed)	26443449
rs4430796	chr17	Type 2 diabetes	9e-10	rs4430796	None	0.53	12,171 European ancestry cases, 56,862 European ancestry controls, 6,952 East Asian ancestry cases, 11,865 East Asian ancestry controls, 5,561 South Asian ancestry cases, 14,458 South Asian ancestry controls, 1,804 Mexican ancestry cases, 779 Mexican ancestry controls	17q12	HNF1B	Affymetrix, Illumina [2500000] (imputed)	24509480
rs4430796	chr17	Type 2 diabetes	4e-06	rs4430796	None	0.37	5,976 Japanese ancestry cases, 20,829 Japanese ancestry controls	17q12	HNF1B	Illumina [6209637] (imputed)	23945395
rs4430796	chr17	Type 2 diabetes	2e-11	rs4430796	None	0.276	1,839 Han Chinese ancestry cases, 1,873 Han Chinese ancestry controls	17q12	HNF1B	Illumina [2234194] (imputed)	22961080
rs4430796	chr17	Endometrial cancer	7e-10	rs4430796	None	0.52	1,265 European ancestry cases, 5,190 European ancestry controls	17q12	HNF1B	Illumina [519655]	21499250
rs4430796	chr17	Serum prostate-specific antigen levels	6e-11	rs4430796	None	0.52	7,538 European ancestry individuals	17q12	HNF1B	Illumina [304070]	21160077
rs4430796	chr17	Type 2 diabetes	2e-06	rs4430796	None		8,130 European ancestry cases, 38,987 European ancestry controls	17q12	HNF1B, TCF2	Affymetrix, Illumina [2426886] (imputed)	20581827
rs4430796	chr17	Prostate cancer	8e-06	rs4430796	None	0.52	Up to 1,968 European ancestry cases, 35,382 European ancestry controls	17q12	intergenic	Illumina [310520]	19767754
rs4430796	chr17	Prostate cancer	1e-09	rs4430796	None	0.54	1,172 European ancestry cases, 1,157 European ancestry controls	17q12	HNF1B	Illumina [527869]	18264096
rs4430796	chr17	Prostate cancer	1e-11	rs4430796	None	0.49	1,501 European ancestry cases, 11,290 European ancestry controls	17q12	TCF2	Illumina [310520]	17603485
rs3786897	chr19	Waist-to-hip ratio adjusted for BMI	5e-63	rs3786897	None	0.42	660,648 European ancestry individuals	19q13.11	None	Affymetrix [2446094] (imputed)	30575882
rs3786897	chr19	Waist-hip ratio	5e-08	rs3786897	None	0.42	663,598 European ancestry individuals	19q13.11	None	Affymetrix [2446094] (imputed)	30575882
rs3786897	chr19	Waist-to-hip ratio adjusted for BMI	3e-58	rs3786897	None	0.5803	315,284 European ancestry male individuals	19q13.11	None	NR [~ 27400000] (imputed)	30239722
rs3786897	chr19	Waist-hip ratio	1e-43	rs3786897	None	0.5805	697,734 European ancestry individuals	19q13.11	NA	NR [~ 27400000] (imputed)	30239722
rs3786897	chr19	Waist-hip ratio	1e-43	rs3786897	None	0.5805	381,152 European female individuals	19q13.11	None	NR [~ 27400000] (imputed)	30239722
rs3786897	chr19	Waist-hip ratio	1e-43	rs3786897	None	0.5805	316,772 European ancestry male individuals	19q13.11	None	NR [~ 27400000] (imputed)	30239722
rs3786897	chr19	Type 2 diabetes	5e-06	rs3786897	None	0.4026	6,353 South Asian ancestry cases, 7,179 South Asian ancestry controls, 3,871 European ancestry cases, 16,427 European ancestry controls, 34,840 cases, 114,981 controls	19q13.11	PEPD	Affymetrix, Illumina [NR] (imputed)	28869590
rs3786897	chr19	Waist-to-hip ratio adjusted for body mass index	2e-13	rs3786897	None	0.4162	2,518 African American women, 83,707 European ancestry women, 1,773 Filipino ancestry women, 1,030 Indian ancestry women, 1,457 African American men, 52,993 European ancestry men, 7,648 Indian ancestry men, 5,527 European ancestry individuals	19q13.11	PEPD	Affymetrix, Illumina, Perlegen [~ 2500000] (imputed)	28448500
rs3786897	chr19	Waist-to-hip ratio adjusted for body mass index	1e-06	rs3786897	None	0.4162	2,518 African American women, 83,707 European ancestry women, 1,773 Filipino ancestry women, 1,030 Indian ancestry women, 1,457 African American men, 52,993 European ancestry men, 7,648 Indian ancestry men, 5,527 European ancestry individuals	19q13.11	PEPD	Affymetrix, Illumina, Perlegen [~ 2500000] (imputed)	28448500
rs3786897	chr19	Waist-to-hip ratio adjusted for BMI in active individuals	8e-06	rs3786897	None	0.4169	1,957 African American women, 1,421 Filipino ancestry women, 305 Indian ancestry women, 65,539 European ancestry women, 1,206 African American men, 2,029 Indian ancestry men, 41,673 European ancestry men, 4,819 European ancestry individuals	19q13.11	PEPD	Affymetrix, Illumina, Perlegen [~ 2500000] (imputed)	28448500
rs3786897	chr19	Waist-to-hip ratio adjusted for BMI in active individuals	4e-10	rs3786897	None	0.4162	1,957 African American women, 1,421 Filipino ancestry women, 305 Indian ancestry women, 65,539 European ancestry women, 1,206 African American men, 2,029 Indian ancestry men, 41,673 European ancestry men, 4,819 European ancestry individuals	19q13.11	CEBPA	Affymetrix, Illumina, Perlegen [~ 2500000] (imputed)	28448500
rs3786897	chr19	Waist circumference adjusted for body mass index	1e-09	rs3786897	None	0.4238	2,518 African American women, 85,730 European ancestry women, 1,773 Filipino ancestry women, 1,030 Indian ancestry women, 1,457 African American men, 54,792 European ancestry men, 7,648 Indian ancestry men, 5,527 European ancestry individuals	19q13.11	PEPD	Affymetrix, Illumina, Perlegen [~ 2500000] (imputed)	28448500
rs3786897	chr19	Waist circumference adjusted for body mass index	1e-08	rs3786897	None	0.4156	2,518 African American women, 85,730 European ancestry women, 1,773 Filipino ancestry women, 1,030 Indian ancestry women, 1,457 African American men, 54,792 European ancestry men, 7,648 Indian ancestry men, 5,527 European ancestry individuals	19q13.11	PEPD	Affymetrix, Illumina, Perlegen [~ 2500000] (imputed)	28448500
rs3786897	chr19	Waist circumference adjusted for BMI in active individuals	3e-08	rs3786897	None	0.4238	1,957 African American women, 1,773 Filipino ancestry women, 305 Indian ancestry women, 67,139 European ancestry women, 1,206 African American men, 2,029 Indian ancestry men, 43,100 European ancestry men, at least 4,819 European ancestry individuals	19q13.11	PEPD	Affymetrix, Illumina, Perlegen [~ 2500000] (imputed)	28448500
rs3786897	chr19	Waist circumference adjusted for BMI in active individuals	7e-07	rs3786897	None	0.4156	1,957 African American women, 1,773 Filipino ancestry women, 305 Indian ancestry women, 67,139 European ancestry women, 1,206 African American men, 2,029 Indian ancestry men, 43,100 European ancestry men, at least 4,819 European ancestry individuals	19q13.11	PEPD	Affymetrix, Illumina, Perlegen [~ 2500000] (imputed)	28448500
rs3786897	chr19	Waist circumference adjusted for BMI (joint analysis main effects and physical activity interaction)	5e-09	rs3786897	None	0.4238	2,518 African American women, 85,730 European ancestry women, 1,773 Filipino ancestry women, 1,030 Indian ancestry women, 1,457 African American men, 54,792 European ancestry men, 7,648 Indian ancestry men, 5,527 European ancestry individuals	19q13.11	PEPD	Affymetrix, Illumina, Perlegen [~ 2500000] (imputed)	28448500
rs3786897	chr19	Waist circumference adjusted for BMI (joint analysis main effects and physical activity interaction)	8e-08	rs3786897	None	0.4156	2,518 African American women, 85,730 European ancestry women, 1,773 Filipino ancestry women, 1,030 Indian ancestry women, 1,457 African American men, 54,792 European ancestry men, 7,648 Indian ancestry men, 5,527 European ancestry individuals	19q13.11	PEPD	Affymetrix, Illumina, Perlegen [~ 2500000] (imputed)	28448500
rs3786897	chr19	Waist circumference adjusted for BMI (joint analysis main effects and smoking interaction)	3e-07	rs3786897	None	0.5764	97,400 European ancestry women, 63,892 European ancestry men, 5,829 European ancestry individuals, 10,500 African American/Afro-Caribbean ancestry women, 2,706 African American/Afro-Caribbean ancestry men, 1,030 Indian Asian ancestry women, 7,648 Indian Asian ancestry men, 1,793 Filipino ancestry women, 2,944 Hispanic/Latino ancestry women, 1,764 Hispanic/Latino ancestry men	19q13.11	PEPD	Affymetrix, Illumina, Perlegen [up to 2800000] (imputed)	28443625
rs3786897	chr19	Waist circumference adjusted for BMI (adjusted for smoking behaviour)	1e-07	rs3786897	None	0.5764	97,400 European ancestry women, 63,892 European ancestry men, 5,829 European ancestry individuals, 10,500 African American/Afro-Caribbean ancestry women, 2,706 African American/Afro-Caribbean ancestry men, 1,030 Indian Asian ancestry women, 7,648 Indian Asian ancestry men, 1,793 Filipino ancestry women, 2,944 Hispanic/Latino ancestry women, 1,764 Hispanic/Latino ancestry men	19q13.11	PEPD	Affymetrix, Illumina, Perlegen [up to 2800000] (imputed)	28443625
rs3786897	chr19	Waist-hip ratio	4e-11	rs3786897	None	0.5825	up to 56,910 European ancestry men, up to 86,570 European ancestry women	19q13.11	PEPD	Affymetrix, Illumina, Perlegen [up to 2542447] (imputed)	25673412
rs3786897	chr19	Waist-hip ratio	3e-07	rs3786897	None	0.5825	up to 56,910 European ancestry men, up to 86,570 European ancestry women	19q13.11	PEPD	Affymetrix, Illumina, Perlegen [up to 2542447] (imputed)	25673412
rs3786897	chr19	Waist-hip ratio	3e-06	rs3786897	None	0.5825	up to 56,910 European ancestry men, up to 86,570 European ancestry women	19q13.11	PEPD	Affymetrix, Illumina, Perlegen [up to 2542447] (imputed)	25673412
rs3786897	chr19	Waist circumference adjusted for body mass index	9e-09	rs3786897	None	0.5815	up to 56,910 European ancestry men, up to 86,570 European ancestry women	19q13.11	PEPD	Affymetrix, Illumina, Perlegen [up to 2542447] (imputed)	25673412
rs3786897	chr19	Waist circumference adjusted for body mass index	2e-07	rs3786897	None	0.5815	up to 56,910 European ancestry men, up to 86,570 European ancestry women	19q13.11	PEPD	Affymetrix, Illumina, Perlegen [up to 2542447] (imputed)	25673412
rs3786897	chr19	Type 2 diabetes	1e-08	rs3786897	None	0.56	5,999 East Asian ancestry cases, 9,001 East Asian ancestry controls, 794 Malay ancestry cases, 1,240 Malay ancestry controls, 159 Filipino ancestry cases, 1,624 Filipino ancestry controls	19q13.11	PEPD	Affymetrix, Illumina [2626356] (imputed)	22158537
rs1260326	chr2	Serum metabolite levels (CMS)	1e-10	rs1260326	None	None	6,263 Finnish ancestry men	2p23.3	GCKR	Illumina [609262]	31636271
rs1260326	chr2	Serum metabolite levels	9e-13	rs1260326	None	None	6,263 Finnish ancestry men	2p23.3	GCKR	Illumina [609262]	31636271
rs1260326	chr2	Serum metabolite levels	9e-12	rs1260326	None	None	6,263 Finnish ancestry men	2p23.3	GCKR	Illumina [609262]	31636271
rs1260326	chr2	Serum metabolite levels	7e-07	rs1260326	None	None	6,263 Finnish ancestry men	2p23.3	GCKR	Illumina [609262]	31636271
rs1260326	chr2	Serum metabolite levels	7e-19	rs1260326	None	None	6,263 Finnish ancestry men	2p23.3	GCKR	Illumina [609262]	31636271
rs1260326	chr2	Serum metabolite levels	7e-12	rs1260326	None	None	6,263 Finnish ancestry men	2p23.3	GCKR	Illumina [609262]	31636271
rs1260326	chr2	Serum metabolite levels	6e-13	rs1260326	None	None	6,263 Finnish ancestry men	2p23.3	GCKR	Illumina [609262]	31636271
rs1260326	chr2	Serum metabolite levels	5e-13	rs1260326	None	None	6,263 Finnish ancestry men	2p23.3	GCKR	Illumina [609262]	31636271
rs1260326	chr2	Serum metabolite levels	5e-12	rs1260326	None	None	6,263 Finnish ancestry men	2p23.3	GCKR	Illumina [609262]	31636271
rs1260326	chr2	Serum metabolite levels	4e-12	rs1260326	None	None	6,263 Finnish ancestry men	2p23.3	GCKR	Illumina [609262]	31636271
rs1260326	chr2	Serum metabolite levels	3e-06	rs1260326	None	None	6,263 Finnish ancestry men	2p23.3	GCKR	Illumina [609262]	31636271
rs1260326	chr2	Serum metabolite levels	3e-10	rs1260326	None	None	6,263 Finnish ancestry men	2p23.3	GCKR	Illumina [609262]	31636271
rs1260326	chr2	Serum metabolite levels	2e-09	rs1260326	None	None	6,263 Finnish ancestry men	2p23.3	GCKR	Illumina [609262]	31636271
rs1260326	chr2	Serum metabolite levels	2e-13	rs1260326	None	None	6,263 Finnish ancestry men	2p23.3	GCKR	Illumina [609262]	31636271
rs1260326	chr2	Serum metabolite levels	2e-11	rs1260326	None	None	6,263 Finnish ancestry men	2p23.3	GCKR	Illumina [609262]	31636271
rs1260326	chr2	Serum metabolite levels	1e-08	rs1260326	None	None	6,263 Finnish ancestry men	2p23.3	GCKR	Illumina [609262]	31636271
rs1260326	chr2	Serum metabolite levels	1e-07	rs1260326	None	None	6,263 Finnish ancestry men	2p23.3	GCKR	Illumina [609262]	31636271
rs1260326	chr2	Serum metabolite levels	1e-11	rs1260326	None	None	6,263 Finnish ancestry men	2p23.3	GCKR	Illumina [609262]	31636271
rs1260326	chr2	Metabolic syndrome	7e-16	rs1260326	None	0.392938	291,107 European ancestry individuals	2p23.3	GCKR	Affymetrix [9463307] (imputed)	31589552
rs1260326	chr2	Urate levels	1e-19	rs1260326	None	0.5568	288,649 European ancestry individuals, 125,725 East Asian ancestry individuals, 33,671 African American individuals, 9,037 South Asian ancestry individuals, 608 Hispanic individuals	2p23.3	GCKR	Affymetrix, Illumina [8249849] (imputed)	31578528
rs1260326	chr2	Urate levels	3e-95	rs1260326	None	0.4359	288,649 European ancestry individuals, 125,725 East Asian ancestry individuals, 33,671 African American individuals, 9,037 South Asian ancestry individuals, 608 Hispanic individuals	2p23.3	GCKR	Affymetrix, Illumina [8249849] (imputed)	31578528
rs1260326	chr2	Urate levels	9e-07	rs1260326	None	0.1435	288,649 European ancestry individuals, 125,725 East Asian ancestry individuals, 33,671 African American individuals, 9,037 South Asian ancestry individuals, 608 Hispanic individuals	2p23.3	GCKR	Affymetrix, Illumina [8249849] (imputed)	31578528
rs1260326	chr2	Urate levels	5e-69	rs1260326	None	0.3983	288,649 European ancestry individuals	2p23.3	GCKR	Affymetrix, Illumina [8217339] (imputed)	31578528
rs1260326	chr2	Urate levels	4e-27	rs1260326	None	0.5555	174,111 European, East Asian, African American, South Asian and Hispanic ancestry men, 172,102 European, East Asian, African American, South Asian and Hispanic ancestry women	2p23.3	None	Affymetrix, Illumina [8249849] (imputed)	31578528
rs1260326	chr2	Urate levels	1e-51	rs1260326	None	0.5435	174,111 European, East Asian, African American, South Asian and Hispanic ancestry men, 172,102 European, East Asian, African American, South Asian and Hispanic ancestry women	2p23.3	None	Affymetrix, Illumina [8249849] (imputed)	31578528
rs1260326	chr2	Gout	4e-41	rs1260326	None	None	13,179 European, African American and unknown ancestry cases, 750,634 European, African American and unknown ancestry controls	2p23.3	GCKR	Affymetrix, Illumina [8249849] (imputed)	31578528
rs1260326	chr2	Height	2e-16	rs1260326	None	None	159,095 Japanese ancestry individuals	2p23.3	GCKR	Illumina [27896057] (imputed)	31562340
rs1260326	chr2	Estimated glomerular filtration rate in non-diabetics	4e-17	rs1260326	None	0.391	152,624 European ancestry individuals, 36,369 African American individuals	2p23.3	GCKR	Affymetrix [NR] (imputed)	31451708
rs1260326	chr2	Estimated glomerular filtration rate	1e-34	rs1260326	None	0.422	70,762 European ancestry diabetic individuals, 152,624 European ancestry non-diabetic individuals, 20,967 African American diabetic individuals, 36,369 African American non-diabetic individuals	2p23.3	GCKR	Affymetrix [NR] (imputed)	31451708
rs1260326	chr2	Estimated glomerular filtration rate	3e-36	rs1260326	None	0.3906	70,762 European ancestry diabetic individuals, 152,624 European ancestry non-diabetic individuals, 20,967 African American diabetic individuals, 36,369 African American non-diabetic individuals	2p23.3	GCKR	Affymetrix [NR] (imputed)	31451708
rs1260326	chr2	Urinary sodium excretion	1e-20	rs1260326	None	0.395664	446,237 European ancestry individuals	2p23.3	GCKR	Affymetrix [~ 8800000] (imputed)	31409800
rs1260326	chr2	Alcohol consumption	2e-60	rs1260326	None	0.3939	480,842 European ancestry individuals	2p23.3	GCKR	Affymetrix, Illumina [~ 7100000] (imputed)	31358974
rs1260326	chr2	White blood cell count	4e-07	rs1260326	None	None	8,825 African American individuals, 18,251 Hispanic/Latino individuals, 543 Asian ancestry individuals, 606 Native American ancestry individuals, 383 individuals	2p23.3	None	Illumina [30613845] (imputed)	31217584
rs1260326	chr2	Triglyceride levels	6e-62	rs1260326	None	None	9,980 African American individuals, 17,856 Hispanic/Latino individuals, 2,381 Asian ancestry individuals, 1,915 Native Hawaiian ancestry individuals, 604 Native American ancestry individuals, 360 individuals	2p23.3	None	Illumina [31978265] (imputed)	31217584
rs1260326	chr2	Total cholesterol levels	1e-23	rs1260326	None	None	10,137 African American individuals, 17,802 Hispanic/Latino individuals, 2,387 Asian ancestry individuals, 1,915 Native Hawaiian ancestry individuals, 604 Native American ancestry individuals, 340 individuals	2p23.3	None	Illumina [32003504] (imputed)	31217584
rs1260326	chr2	Low density lipoprotein cholesterol levels	8e-08	rs1260326	None	None	9,720 African American individuals, 17,373 Hispanic/Latino individuals, 2,316 Asian ancestry individuals, 1,900 Native Hawaiian ancestry individuals, 591 Native American ancestry individuals, 321 individuals	2p23.3	None	Illumina [31808917] (imputed)	31217584
rs1260326	chr2	Fasting blood glucose	1e-15	rs1260326	None	None	6,457 African American individuals, 13,556 Hispanic/Latino individuals, 1,918 Asian ancestry individuals, 1,400 Native Hawaiian ancestry individuals, 412 Native American ancestry individuals, 168 individuals	2p23.3	None	Illumina [29713514] (imputed)	31217584
rs1260326	chr2	C-reactive protein levels	3e-27	rs1260326	None	None	8,349 African American individuals, 15,912 Hispanic/Latino individuals, 1,811 Asian ancestry individuals, 1,777 Native Hawaiian ancestry individuals, 574 Native American ancestry individuals, 97 individuals	2p23.3	None	Illumina [30861016] (imputed)	31217584
rs1260326	chr2	Coffee consumption	1e-19	rs1260326	None	0.6047	335,909 European ancestry individuals	2p23.3	GCKR	Affymetrix [~ 7740000] (imputed)	31046077
rs1260326	chr2	Bitter beverage consumption	1e-11	rs1260326	None	0.6058	85,852 European ancestry individuals	2p23.3	GCKR	Affymetrix [~ 7740000] (imputed)	31046077
rs1260326	chr2	Bitter alcoholic beverage consumption	2e-35	rs1260326	None	0.6034	336,448 European ancestry individuals	2p23.3	GCKR	Affymetrix [~ 7740000] (imputed)	31046077
rs1260326	chr2	Glycemic traits (pleiotropy)	6e-13	rs1260326	None	None	46,186 European ancestry individuals	2p23.3	GCKR	NR [NR]	31021400
rs1260326	chr2	Medication use (HMG CoA reductase inhibitors)	1e-25	rs1260326	None	0.395882	73,475 European ancestry cases, 216,910 European ancestry controls	2p23.3	GCKR	Affymetrix [7288503] (imputed)	31015401
rs1260326	chr2	Serum uric acid levels	8e-19	rs1260326	None	0.5589	121,745 Japanese ancestry individuals, at least 88,461 European ancestry individuals	2p23.3	GCKR	Illumina [1986983] (imputed)	30993211
rs1260326	chr2	Serum uric acid levels	3e-45	rs1260326	None	0.4	121,745 Japanese ancestry individuals, at least 88,461 European ancestry individuals	2p23.3	GCKR	Illumina [1986983] (imputed)	30993211
rs1260326	chr2	Serum uric acid levels	8e-19	rs1260326	None	0.559	121,745 Japanese ancestry individuals	2p23.3	GCKR	Illumina [5864938] (imputed)	30993211
rs1260326	chr2	Urolithiasis	5e-11	rs1260326	None	0.556	11,130 Japanese ancestry cases, 187,639 Japanese ancestry controls	2p23.3	GCKR	Illumina [6603247] (imputed)	30975718
rs1260326	chr2	Alcohol use disorder (consumption score)	2e-16	rs1260326	None	0.652	200,680 European American individuals, 56,495 African American individuals, 14,112 Latino American individuals, 1,366 East Asian American individuals, 189 South Asian American individuals	2p23.3	GCKR	Affymetrix [up to 12500000] (imputed)	30940813
rs1260326	chr2	Alcohol use disorder (consumption score)	2e-16	rs1260326	None	0.591	200,680 European American individuals, 56,495 African American individuals, 14,112 Latino American individuals, 1,366 East Asian American individuals, 189 South Asian American individuals	2p23.3	GCKR	Affymetrix [up to 12500000] (imputed)	30940813
rs1260326	chr2	Alcohol use disorder	2e-13	rs1260326	None	0.651	34,658 European American cases, 167,346 European American controls, 17,267 African American cases, 39,381 African American controls, 3,449 Latino American cases, 10,726 Latino American controls, 164 East Asian American cases, 1,210 East Asian American controls, 46 South Asian American cases, 144 South Asian American controls	2p23.3	GCKR	Affymetrix [up to 12500000] (imputed)	30940813
rs1260326	chr2	Alcohol use disorder	1e-16	rs1260326	None	0.591	34,658 European American cases, 167,346 European American controls, 17,267 African American cases, 39,381 African American controls, 3,449 Latino American cases, 10,726 Latino American controls, 164 East Asian American cases, 1,210 East Asian American controls, 46 South Asian American cases, 144 South Asian American controls	2p23.3	GCKR	Affymetrix [up to 12500000] (imputed)	30940813
rs1260326	chr2	Triglyceride levels	1e-84	rs1260326	None	0.3666	up to 23,508 African ancestry individuals, 4,649 Asian ancestry individuals, up to 77,047 European ancestry individuals, 6,705 Hispanic individuals	2p23.3		Affymetrix, Illumina, Perlegen [NR] (imputed)	30926973
rs1260326	chr2	LDL cholesterol levels	2e-08	rs1260326	None	0.4069	up to 23,353 African ancestry individuals, 13,171 Asian ancestry individuals, up to 82,522 European ancestry individuals, 6,646 Hispanic individuals	2p23.3		Affymetrix, Illumina, Perlegen [NR] (imputed)	30926973
rs1260326	chr2	Triglyceride levels	1e-06	rs1260326	None	None	1,036 Indian ancestry individuals	2p23.3	GCKR	Illumina [551825]	30911093
rs1260326	chr2	Urinary sodium to creatinine ratio	2e-21	rs1260326	None	0.6082	218,450 European ancestry individuals	2p23.3	GCKR	Affymetrix [19420026] (imputed)	30910378
rs1260326	chr2	Alcohol consumption (drinks per week)	5e-40	rs1260326	None	0.61	up to 357,854 European ancestry individuals	2p23.3	GCKR	Illumina [~ 250000] (imputed)	30679032
rs1260326	chr2	Alcohol consumption (drinks per week)	5e-40	rs1260326	None	0.608	up to 357,854 European ancestry individuals	2p23.3	GCKR	Illumina [~ 250000] (imputed)	30679032
rs1260326	chr2	Triglycerides x physical activity interaction (2df test)	3e-259	rs1260326	None	0.3642	7,294 African American inactive individuals, 12,832 African American active individuals, 1,352 Asian ancestry inactive individuals, 3,049 Asian ancestry active individuals, 20,622 European ancestry inactive individuals, 51,480 European ancestry active individuals, 2,166 Hispanic or Latin American inactive individuals, 3,486 Hispanic or Latin American active individuals	2p23.3	None	Affymetrix, Illumina [at least 2500000] (imputed)	30670697
rs1260326	chr2	Alcohol consumption (drinks per week)	1e-52	rs1260326	None	0.3929	414,343 European ancestry individuals	2p23.3	GCKR	Affymetrix [11514936] (imputed)	30643258
rs1260326	chr2	Alcohol consumption (drinks per week) (MTAG)	3e-44	rs1260326	None	0.601	up to 1,039,210 European ancestry individuals	2p23.3	None	NR [~ 9732723] (imputed)	30643251
rs1260326	chr2	Alcohol consumption (drinks per week)	8e-45	rs1260326	None	0.601	up to 941,280 European ancestry individuals	2p23.3	None	NR [~ 10000000] (imputed)	30643251
rs1260326	chr2	Factor VII activity or levels	8e-34	rs1260326	None	0.42	24,075 European ancestry individuals, 3,420 African American individuals	2p23.3	GCKR	Affymetrix, Illumina [10044948] (imputed)	30642921
rs1260326	chr2	Factor VII activity	2e-28	rs1260326	None	0.41	20,014 European ancestry individuals, 3,420 African American individuals	2p23.3	GCKR	Affymetrix, Illumina [10044948] (imputed)	30642921
rs1260326	chr2	Factor VII activity	2e-30	rs1260326	None	0.39	20,014 European ancestry individuals, 3,420 African American individuals	2p23.3	GCKR	Affymetrix, Illumina [10044948] (imputed)	30642921
rs1260326	chr2	Estimated glomerular filtration rate	2e-35	rs1260326	None	0.534	134,070 European ancestry individuals, 143,658 East Asian ancestry individuals, 26,344 Hispanic or Latino ancestry individuals, 8,224 African American individuals	2p23.3	GCKR	Affymetrix, Illumina [at least 5248638] (imputed)	30604766
rs1260326	chr2	White blood cell count	4e-59	rs1260326	None	None	approximately 444,000 European ancestry individuals	2p23.3		NR [~ 8900000] (imputed)	30595370
rs1260326	chr2	Type 2 diabetes	1e-15	rs1260326	None	None	approximately 459,000 European ancestry individuals	2p23.3		NR [~ 8900000] (imputed)	30595370
rs1260326	chr2	Red cell distribution width	1e-25	rs1260326	None	None	approximately 445,000 European ancestry individuals	2p23.3		NR [~ 8900000] (imputed)	30595370
rs1260326	chr2	Height	1e-36	rs1260326	None	None	approximately 458,000 European ancestry individuals	2p23.3		NR [~ 8900000] (imputed)	30595370
rs1260326	chr2	Fat-free mass	4e-22	rs1260326	None	None	70,700 European ancestry female individuals, 85,261 European ancestry male individuals	2p23.3	None	Affymetrix [7794483] (imputed)	30593698
rs1260326	chr2	Fat-free mass	2e-13	rs1260326	None	None	70,700 European ancestry female individuals, 85,261 European ancestry male individuals	2p23.3	None	Affymetrix [7794483] (imputed)	30593698
rs1260326	chr2	Fat-free mass	1e-12	rs1260326	None	None	70,700 European ancestry female individuals, 85,261 European ancestry male individuals	2p23.3	None	Affymetrix [7794483] (imputed)	30593698
rs1260326	chr2	Gallstone disease	2e-16	rs1260326	None		27,174 European ancestry cases, 736,838 European ancestry controls	2p23.3	GCKR	Affymetrix, Illumina [43000000] (imputed)	30504769
rs1260326	chr2	C-reactive protein levels	8e-23	rs1260326	None	None	up to 92,771 European ancestry males, up to 113,387 European ancestry females	2p23.3	GCKR	Affymetrix, Illumina, Perlegen [2437193] (imputed)	30388399
rs1260326	chr2	C-reactive protein levels	2e-78	rs1260326	None	None	up to 92,771 European ancestry males, up to 113,387 European ancestry females	2p23.3	GCKR	Affymetrix, Illumina, Perlegen [2437193] (imputed)	30388399
rs1260326	chr2	C-reactive protein levels	3e-92	rs1260326	None	0.39	up to 92,771 European ancestry males, up to 113,387 European ancestry females	2p23.3	GCKR	Affymetrix, Illumina, Perlegen [2437193] (imputed)	30388399
rs1260326	chr2	C-reactive protein levels	9e-86	rs1260326	None	0.4	148,164 European ancestry individuals	2p23.3	GCKR	Affymetrix, Illumina, Perlegen [10019203] (imputed)	30388399
rs1260326	chr2	Alcohol use disorder (total score)	9e-13	rs1260326	None	None	141,932 European ancestry individuals	2p23.3	SNX17, GCKR	NR [16213998]	30336701
rs1260326	chr2	Alcohol use disorder (consumption score)	6e-09	rs1260326	None	None	121,604 British ancestry individuals	2p23.3	GCKR	NR [16213998]	30336701
rs1260326	chr2	Type 2 diabetes	7e-25	rs1260326	None	0.6069	74,124 European ancestry cases, 824,006 European ancestry controls	2p23.3	GCKR	Affymetrix, Illumina [~ 27000000] (imputed)	30297969
rs1260326	chr2	Triglycerides	1e-300	rs1260326	None	0.379	215,551 European ancestry individuals, 57,332 African American individuals, 24,743 Hispanic individuals	2p23.3	GCKR	Affymetrix [up to 31400000] (imputed)	30275531
rs1260326	chr2	Total cholesterol levels	3e-160	rs1260326	None	0.3798	215,551 European ancestry individuals, 57,332 African American individuals, 24,743 Hispanic individuals	2p23.3	GCKR	Affymetrix [up to 31400000] (imputed)	30275531
rs1260326	chr2	Body mass index	5e-06	rs1260326	None	None	315,347 European ancestry individuals, 8,322 Hispanic/Latino individuals, 7,290 East Asian ancestry individuals, 3,069 African American individuals, 459 South Asian ancestry individuals	2p23.3	None	Affymetrix [at least 28613428] (imputed)	30108127
rs1260326	chr2	Percent glycated albumin	2e-08	rs1260326	None	0.41	7,647 European ancestry individuals, 2,104 Black individuals	2p23.3	GCKR	Affymetrix [NR] (imputed)	29844224
rs1260326	chr2	Resting heart rate	1e-10	rs1260326	None	0.397939	67,062 European ancestry individuals	2p23.3	GCKR	Affymetrix [~ 7800000] (imputed)	29769521
rs1260326	chr2	Type 2 diabetes (adjusted for BMI)	1e-14	rs1260326	None	0.617	up to 48,286 European ancestry cases, up to 250,671 European ancestry controls	2p23.3	GCKR	Affymetrix, Illumina [247470]	29632382
rs1260326	chr2	Type 2 diabetes (adjusted for BMI)	3e-18	rs1260326	None	0.63	48,286 European ancestry cases, 250,671 European ancestry controls, 33,126 African American, East Asian, Hispanic/Latino or South Asian cases, 120,161 African American, East Asian, Hispanic/Latino or South Asian controls	2p23.3	GCKR	Affymetrix, Illumina [247470]	29632382
rs1260326	chr2	Type 2 diabetes	1e-15	rs1260326	None	0.617	up to 48,286 European ancestry cases, up to 250,671 European ancestry controls	2p23.3	GCKR	Affymetrix, Illumina [247470]	29632382
rs1260326	chr2	Type 2 diabetes	5e-25	rs1260326	None	0.63	48,286 European ancestry cases, 250,671 European ancestry controls, 33,126 African American, East Asian, Hispanic/Latino or South Asian cases, 120,161 African American, East Asian, Hispanic/Latino or South Asian controls	2p23.3	GCKR	Affymetrix, Illumina [247470]	29632382
rs1260326	chr2	Triglycerides	1e-300	rs1260326	None	None	76,627 European ancestry individuals, 7,795 Hispanic individuals, 6,855 East Asian ancestry individuals, 2,958 African American individuals, 439 South Asian ancestry individuals	2p23.3	None	Affymetrix [at least 7091467] (imputed)	29507422
rs1260326	chr2	Triglycerides	1e-23	rs1260326	None	0.478	76,627 European ancestry individuals, 7,795 Hispanic individuals, 6,855 East Asian ancestry individuals, 2,958 African American individuals, 439 South Asian ancestry individuals	2p23.3	None	Affymetrix [at least 7091467] (imputed)	29507422
rs1260326	chr2	Triglycerides	2e-272	rs1260326	None	0.422	76,627 European ancestry individuals, 7,795 Hispanic individuals, 6,855 East Asian ancestry individuals, 2,958 African American individuals, 439 South Asian ancestry individuals	2p23.3	None	Affymetrix [at least 7091467] (imputed)	29507422
rs1260326	chr2	Triglycerides	1e-26	rs1260326	None	0.368	76,627 European ancestry individuals, 7,795 Hispanic individuals, 6,855 East Asian ancestry individuals, 2,958 African American individuals, 439 South Asian ancestry individuals	2p23.3	None	Affymetrix [at least 7091467] (imputed)	29507422
rs1260326	chr2	Total cholesterol levels	3e-70	rs1260326	None	None	76,627 European ancestry individuals, 7,795 Hispanic individuals, 6,855 East Asian ancestry individuals, 2,958 African American individuals, 439 South Asian ancestry individuals	2p23.3	None	Affymetrix [at least 7091467] (imputed)	29507422
rs1260326	chr2	Total cholesterol levels	1e-07	rs1260326	None	0.478	76,627 European ancestry individuals, 7,795 Hispanic individuals, 6,855 East Asian ancestry individuals, 2,958 African American individuals, 439 South Asian ancestry individuals	2p23.3	None	Affymetrix [at least 7091467] (imputed)	29507422
rs1260326	chr2	Total cholesterol levels	2e-56	rs1260326	None	0.422	76,627 European ancestry individuals, 7,795 Hispanic individuals, 6,855 East Asian ancestry individuals, 2,958 African American individuals, 439 South Asian ancestry individuals	2p23.3	None	Affymetrix [at least 7091467] (imputed)	29507422
rs1260326	chr2	Total cholesterol levels	5e-10	rs1260326	None	0.368	76,627 European ancestry individuals, 7,795 Hispanic individuals, 6,855 East Asian ancestry individuals, 2,958 African American individuals, 439 South Asian ancestry individuals	2p23.3	None	Affymetrix [at least 7091467] (imputed)	29507422
rs1260326	chr2	Low density lipoprotein cholesterol levels	7e-10	rs1260326	None	None	76,627 European ancestry individuals, 7,795 Hispanic individuals, 6,855 East Asian ancestry individuals, 2,958 African American individuals, 439 South Asian ancestry individuals	2p23.3	None	Affymetrix [at least 7091467] (imputed)	29507422
rs1260326	chr2	Low density lipoprotein cholesterol levels	3e-08	rs1260326	None	0.422	76,627 European ancestry individuals, 7,795 Hispanic individuals, 6,855 East Asian ancestry individuals, 2,958 African American individuals, 439 South Asian ancestry individuals	2p23.3	None	Affymetrix [at least 7091467] (imputed)	29507422
rs1260326	chr2	White blood cell count	2e-09	rs1260326	None	None	107,964 Japanese ancestry individuals	2p23.3	GCKR	Illumina [6108953] (imputed)	29403010
rs1260326	chr2	Triglyceride levels	2e-94	rs1260326	None	None	105,597 Japanese ancestry individuals	2p23.3	GCKR	Illumina [6108953] (imputed)	29403010
rs1260326	chr2	Total cholesterol levels	3e-19	rs1260326	None	None	128,305 Japanese ancestry individuals	2p23.3	GCKR	Illumina [6108953] (imputed)	29403010
rs1260326	chr2	Serum uric acid levels	3e-16	rs1260326	None	None	109,029 Japanese ancestry individuals	2p23.3	GCKR	Illumina [6108953] (imputed)	29403010
rs1260326	chr2	Serum total protein level	4e-21	rs1260326	None	None	113,509 Japanese ancestry individuals	2p23.3	GCKR	Illumina [6108953] (imputed)	29403010
rs1260326	chr2	Serum albumin level	1e-40	rs1260326	None	None	102,223 Japanese ancestry individuals	2p23.3	GCKR	Illumina [6108953] (imputed)	29403010
rs1260326	chr2	Platelet count	6e-22	rs1260326	None	None	108,208 Japanese ancestry individuals	2p23.3	GCKR	Illumina [6108953] (imputed)	29403010
rs1260326	chr2	Glomerular filtration rate	4e-17	rs1260326	None	None	143,658 Japanese ancestry individuals	2p23.3	GCKR	Illumina [6108953] (imputed)	29403010
rs1260326	chr2	Gamma glutamyl transferase levels	1e-48	rs1260326	None	None	118,309 Japanese ancestry individuals	2p23.3	GCKR	Illumina [6108953] (imputed)	29403010
rs1260326	chr2	Blood sugar levels	2e-16	rs1260326	None	None	93,146 Japanese ancestry individuals	2p23.3	GCKR	Illumina [6108953] (imputed)	29403010
rs1260326	chr2	Nonalcoholic fatty liver disease	1e-09	rs1260326	None	0.57	902 Japanese ancestry cases, 7,672 Japanese ancestry controls	2p23.3	GCKR	Illumina [93606]	29385134
rs1260326	chr2	Alcohol consumption in current drinkers	7e-24	rs1260326	None	0.38	108,309 European ancestry individuals	2p23.3	GCKR	Affymetrix [12489781] (imputed)	28937693
rs1260326	chr2	Alcohol consumption	1e-21	rs1260326	None	0.39	59,088 European ancestry females, 53,029 European ancestry males	2p23.3	GCKR	Affymetrix [12489781] (imputed)	28937693
rs1260326	chr2	Blood protein levels in cardiovascular risk	2e-18	rs1260326	None	0.44	3,394 European ancestry individuals	2p23.3	GCKR	Illumina [5270624] (imputed)	28369058
rs1260326	chr2	Triglyceride levels	4e-253	rs1260326	None	0.413	28,183 East Asian ancestry individuals, 177,861 European ancestry individuals	2p23.3	GCKR	Affymetrix, Illumina [up to 1900000] (imputed)	28334899
rs1260326	chr2	Protein C levels	1e-16	rs1260326	None	0.41	10,778 European ancestry individuals, 2,706 African American individuals	2p23.3	GCKR	Affymetrix [at least 22484459] (imputed)	28082259
rs1260326	chr2	Inflammatory bowel disease	1e-07	rs1260326	None		25,042 European and unknown ancestry cases, 34,915 European and unknown ancestry controls	2p23.3	SNX17, ZNF513, KRTCAP3, FNDC4, PPM1G, IFT172, GCKR, NRBP1	Illumina [9725440] (imputed)	28067908
rs1260326	chr2	Crohn's disease	6e-11	rs1260326	None		12,194 European and unknown ancestry cases, 28,072 European and unknown ancestry controls	2p23.3	SNX17, ZNF513, KRTCAP3, FNDC4, PPM1G, IFT172, GCKR, NRBP1	Illumina [9560910] (imputed)	28067908
rs1260326	chr2	Renal overload gout	5e-09	rs1260326	None	0.535	560 Japanese ancestry cases, 1,213 Japanese ancestry controls	2p23.3	GCKR	Illumina [570442]	27899376
rs1260326	chr2	Gout	7e-11	rs1260326	None	0.535	945 Japanese ancestry cases, 1,213 Japanese ancestry controls	2p23.3	GCKR	Illumina [570442]	27899376
rs1260326	chr2	Branched-chain amino acid levels (Valine)	9e-07	rs1260326	None	None	16,596 European ancestry individuals	2p23.3	GCKR	Affymetrix, Illumina [10500000] (imputed)	27898682
rs1260326	chr2	Branched-chain amino acid levels (Leucine)	2e-07	rs1260326	None	None	16,596 European ancestry individuals	2p23.3	GCKR	Affymetrix, Illumina [10500000] (imputed)	27898682
rs1260326	chr2	Branched-chain amino acid levels (Isoleucine)	1e-09	rs1260326	None	0.41	16,596 European ancestry individuals	2p23.3	GCKR	Affymetrix, Illumina [10500000] (imputed)	27898682
rs1260326	chr2	White blood cell count	9e-21	rs1260326	None	0.6053	172,435 European ancestry individuals	2p23.3	GCKR	Affymetrix [~ 2500000] (imputed)	27863252
rs1260326	chr2	Sum neutrophil eosinophil counts	2e-18	rs1260326	None	0.6053	170,384 European ancestry individuals	2p23.3	GCKR	Affymetrix [~ 2500000] (imputed)	27863252
rs1260326	chr2	Sum basophil neutrophil counts	5e-19	rs1260326	None	0.6053	170,143 European ancestry individuals	2p23.3	GCKR	Affymetrix [~ 2500000] (imputed)	27863252
rs1260326	chr2	Red cell distribution width	9e-12	rs1260326	None	0.6052	171,529 European ancestry individuals	2p23.3	GCKR	Affymetrix [~ 2500000] (imputed)	27863252
rs1260326	chr2	Plateletcrit	1e-21	rs1260326	None	0.6049	164,339 European ancestry individuals	2p23.3	GCKR	Affymetrix [~ 2500000] (imputed)	27863252
rs1260326	chr2	Platelet count	2e-25	rs1260326	None	0.605	166,066 European ancestry individuals	2p23.3	GCKR	Affymetrix [~ 2500000] (imputed)	27863252
rs1260326	chr2	Neutrophil count	1e-19	rs1260326	None	0.6053	170,702 European ancestry individuals	2p23.3	GCKR	Affymetrix [~ 2500000] (imputed)	27863252
rs1260326	chr2	Myeloid white cell count	5e-15	rs1260326	None	0.6053	169,219 European ancestry individuals	2p23.3	GCKR	Affymetrix [~ 2500000] (imputed)	27863252
rs1260326	chr2	Lymphocyte counts	2e-12	rs1260326	None	0.6052	171,643 European ancestry individuals	2p23.3	GCKR	Affymetrix [~ 2500000] (imputed)	27863252
rs1260326	chr2	High light scatter reticulocyte percentage of red cells	4e-22	rs1260326	None	0.6052	170,763 European ancestry individuals	2p23.3	GCKR	Affymetrix [~ 2500000] (imputed)	27863252
rs1260326	chr2	Hematocrit	8e-10	rs1260326	None	0.6053	173,039 European ancestry individuals	2p23.3	GCKR	Affymetrix [~ 2500000] (imputed)	27863252
rs1260326	chr2	Granulocyte count	7e-18	rs1260326	None	0.6052	169,822 European ancestry individuals	2p23.3	GCKR	Affymetrix [~ 2500000] (imputed)	27863252
rs1260326	chr2	Resting heart rate	4e-16	rs1260326	None	0.39	127,919 European ancestry individuals, 2,478 Asian ancestry individuals, 1,734 Black individuals, 684 Mixed ancestry individuals, 1,436 individuals	2p23.3	GCKR	Affymetrix [19941912] (imputed)	27798624
rs1260326	chr2	Caffeine metabolism (plasma 1,7-dimethylxanthine (paraxanthine) to 1,3,7-trimethylxanthine (caffeine) ratio)	3e-06	rs1260326	None	0.38	5,323 European ancestry individuals	2p23.3	GCKR	Illumina [~ 31000000] (imputed)	27702941
rs1260326	chr2	Glomerular filtration rate	6e-14	rs1260326	None	None	23,553 European ancestry individuals, 23,536 Japanese individuals, 16,325 Hispanic individuals, 8,224 African American individuals	2p23.3	GCKR	Affymetrix, Illumina [at least 6581000] (imputed)	27588450
rs1260326	chr2	Glomerular filtration rate	2e-07	rs1260326	None	0.6	23,553 European ancestry individuals, 23,536 Japanese individuals, 16,325 Hispanic individuals, 8,224 African American individuals	2p23.3	GCKR	Affymetrix, Illumina [at least 6581000] (imputed)	27588450
rs1260326	chr2	C-reactive protein levels or triglyceride levels (pleiotropy)	4e-151	rs1260326	None	None	65,000 individuals (C-reactive protein), 96,598 individuals (triglycerides)	2p23.3	GCKR	NR [25015711] (imputed)	27286809
rs1260326	chr2	C-reactive protein levels or total cholesterol levels (pleiotropy)	3e-63	rs1260326	None	None	65,000 individuals (C-reactive protein), 100,184 individuals (total cholesterol)	2p23.3	GCKR	NR [2501549] (imputed)	27286809
rs1260326	chr2	Gallstone disease	8e-08	rs1260326	None	0.59	8,720 European ancestry cases, 55,152 European ancestry controls	2p23.3	GCKR	Affymetrix, Illumina [at least 2305318] (imputed)	27094239
rs1260326	chr2	Metabolite levels (small molecules and protein measures)	7e-26	rs1260326	None	0.64	2,118 Erasmus Rucphen (founder/genetic isolate), 22,807 European ancestry individuals	2p23.3	GCKR	Affymetrix, Illumina, Perlegen [12133295] (imputed)	27005778
rs1260326	chr2	Chronic inflammatory diseases (ankylosing spondylitis, Crohn's disease, psoriasis, primary sclerosing cholangitis, ulcerative colitis) (pleiotropy)	2e-23	rs1260326	None	None	8,726 European ancestry ankylosing spondylitis cases, 19,085 European ancestry Crohn's disease cases, 6,530 European ancestry psoriasis cases, 3,408 European ancestry primary sclerosing cholangitis cases, 14,513 European ancestry ulcerative colitis cases, 34,213 European ancestry controls	2p23.3	GCKR	Illumina [130052]	26974007
rs1260326	chr2	Glomerular filtration rate in non diabetics (creatinine)	2e-12	rs1260326	None	None	118,448 European ancestry individuals	2p23.3	GCKR	Affymetrix, Illumina [~ 2500000] (imputed)	26831199
rs1260326	chr2	Glomerular filtration rate (creatinine)	3e-14	rs1260326	None	0.42	133,413 European ancestry individuals	2p23.3	GCKR	Affymetrix, Illumina [~ 2500000] (imputed)	26831199
rs1260326	chr2	Total triglycerides levels	7e-24	rs1260326	None	0.491	12,685 Chinese ancestry individuals	2p23.3	GCKR	Illumina [286795]	26690388
rs1260326	chr2	Plasma lactate levels	4e-52	rs1260326	None	0.41	6,901 European ancestry individuals	2p23.3	GCKR	Affymetrix [~ 38000000] (imputed)	26433129
rs1260326	chr2	Plasma lactate levels	2e-47	rs1260326	None	0.41	6,901 European ancestry individuals	2p23.3	GCKR	Affymetrix [~ 38000000] (imputed)	26433129
rs1260326	chr2	Inflammatory bowel disease	1e-14	rs1260326	None	0.4059	12,882 European ancestry cases, 21,770 European ancestry controls	2p23.3	None	Affymetrix, Illumina [~ 9000000] (imputed)	26192919
rs1260326	chr2	Serum alpha1-antitrypsin levels	3e-16	rs1260326	None	0.432	3,294 Japanese ancestry individuals	2p23.3	GCKR	Illumina [6569727] (imputed)	26174136
rs1260326	chr2	Triglycerides	5e-88	rs1260326	None	0.36	up to 62,166 European ancestry individuals	2p23.3	GCKR	Affymetrix, Illumina, Perlegen [up to 9657952] (imputed)	25961943
rs1260326	chr2	Cholesterol, total	3e-13	rs1260326	None	0.36	up to 62,166 European ancestry individuals	2p23.3	GCKR	Affymetrix, Illumina, Perlegen [up to 9657952] (imputed)	25961943
rs1260326	chr2	Blood metabolite levels	6e-56	rs1260326	None	None	3,953 European ancestry individuals	2p23.3	None	Illumina [2300000]	25898920
rs1260326	chr2	Urate levels in overweight individuals	8e-07	rs1260326	None	0.58	up to 10,058 European ancestry male individuals, up to 7,189 European ancestry female individuals	2p23.3	GCKR	Affymetrix, Illumina [at least 188473] (imputed)	25811787
rs1260326	chr2	Urate levels in overweight individuals	6e-06	rs1260326	None	0.58	up to 10,058 European ancestry male individuals, up to 7,189 European ancestry female individuals	2p23.3	GCKR	Affymetrix, Illumina [at least 188473] (imputed)	25811787
rs1260326	chr2	Gout	2e-12	rs1260326	None	0.55	945 Japanese ancestry cases, 1,213 Japanese ancestry controls	2p23.3	GCKR	Illumina [570442]	25646370
rs1260326	chr2	Fasting blood insulin adjusted for BMI	8e-11	rs1260326	None	None	up to 30,825 non-diabetic individuals	2p23.3	GCKR	Illumina [106489]	25625282
rs1260326	chr2	Fasting blood glucose adjusted for BMI	5e-18	rs1260326	None	None	up to 33,231 non-diabetic individuals	2p23.3	GCKR	Illumina [106489]	25625282
rs1260326	chr2	Coffee consumption (cups per day)	7e-08	rs1260326	None	0.41	91,462 European ancestry individuals	2p23.3	GCKR, FNDC4	Affymetrix, Illumina [2373958] (imputed)	25288136
rs1260326	chr2	Blood metabolite ratios	3e-148	rs1260326	None	0.41	Up to 5,591 European ancestry individuals	2p23.3	GCKR	Affymetrix, Illumina [2100000] (imputed)	24816252
rs1260326	chr2	Blood metabolite levels	6e-14	rs1260326	None	0.41	7,824 European ancestry individuals	2p23.3	GCKR	Affymetrix, Illumina [2100000] (imputed)	24816252
rs1260326	chr2	Blood metabolite levels	1e-77	rs1260326	None	0.41	7,824 European ancestry individuals	2p23.3	GCKR	Affymetrix, Illumina [2100000] (imputed)	24816252
rs1260326	chr2	White blood cell count	9e-08	rs1260326	None	0.43	24,814 European ancestry individuals	2p23.3	GCKR	Illumina [183585]	24777453
rs1260326	chr2	Lipid traits	3e-07	rs1260326	None	0.44	3,451 Han Chinese ancestry individuals	2p23.3	GCKR	Affymetrix, Illumina [up to 2249917] (imputed)	24386095
rs1260326	chr2	Triglycerides	2e-239	rs1260326	None	0.39	94,595 European ancestry individuals	2p23.3	GCKR	NR [NR] (imputed)	24097068
rs1260326	chr2	Cholesterol, total	3e-42	rs1260326	None	0.39	94,595 European ancestry individuals	2p23.3	GCKR	NR [NR] (imputed)	24097068
rs1260326	chr2	Glycemic traits (pregnancy)	6e-13	rs1260326	None	0.409	1,367 European ancestry individuals, 817 Hispanic individuals, 1,075 Afro-Caribbean individuals, 1,178 Thai ancestry individuals	2p23.3	GCKR	Illumina [up to 945994] (imputed)	23903356
rs1260326	chr2	Glycemic traits (pregnancy)	6e-11	rs1260326	None	0.409	1,367 European ancestry individuals, 817 Hispanic individuals, 1,075 Afro-Caribbean individuals, 1,178 Thai ancestry individuals	2p23.3	GCKR	Illumina [up to 945994] (imputed)	23903356
rs1260326	chr2	Metabolite levels	9e-07	rs1260326	None	None	2,076 European ancestry individuals	2p23.3	FNDC4	Affymetrix [at least 2500000] (imputed)	23823483
rs1260326	chr2	Metabolite levels	8e-12	rs1260326	None	None	2,076 European ancestry individuals	2p23.3	FNDC4	Affymetrix [at least 2500000] (imputed)	23823483
rs1260326	chr2	Metabolite levels	7e-08	rs1260326	None	None	2,076 European ancestry individuals	2p23.3	FNDC4	Affymetrix [at least 2500000] (imputed)	23823483
rs1260326	chr2	Metabolite levels	6e-06	rs1260326	None	None	2,076 European ancestry individuals	2p23.3	FNDC4	Affymetrix [at least 2500000] (imputed)	23823483
rs1260326	chr2	Metabolite levels	5e-08	rs1260326	None	None	2,076 European ancestry individuals	2p23.3	FNDC4	Affymetrix [at least 2500000] (imputed)	23823483
rs1260326	chr2	Metabolite levels	5e-06	rs1260326	None	None	2,076 European ancestry individuals	2p23.3	FNDC4	Affymetrix [at least 2500000] (imputed)	23823483
rs1260326	chr2	Metabolite levels	4e-08	rs1260326	None	None	2,076 European ancestry individuals	2p23.3	FNDC4	Affymetrix [at least 2500000] (imputed)	23823483
rs1260326	chr2	Metabolite levels	4e-07	rs1260326	None	None	2,076 European ancestry individuals	2p23.3	FNDC4	Affymetrix [at least 2500000] (imputed)	23823483
rs1260326	chr2	Metabolite levels	3e-09	rs1260326	None	None	2,076 European ancestry individuals	2p23.3	FNDC4	Affymetrix [at least 2500000] (imputed)	23823483
rs1260326	chr2	Metabolite levels	3e-08	rs1260326	None	None	2,076 European ancestry individuals	2p23.3	FNDC4	Affymetrix [at least 2500000] (imputed)	23823483
rs1260326	chr2	Metabolite levels	3e-07	rs1260326	None	None	2,076 European ancestry individuals	2p23.3	FNDC4	Affymetrix [at least 2500000] (imputed)	23823483
rs1260326	chr2	Metabolite levels	3e-06	rs1260326	None	None	2,076 European ancestry individuals	2p23.3	FNDC4	Affymetrix [at least 2500000] (imputed)	23823483
rs1260326	chr2	Metabolite levels	3e-11	rs1260326	None	None	2,076 European ancestry individuals	2p23.3	FNDC4	Affymetrix [at least 2500000] (imputed)	23823483
rs1260326	chr2	Metabolite levels	2e-08	rs1260326	None	None	2,076 European ancestry individuals	2p23.3	FNDC4	Affymetrix [at least 2500000] (imputed)	23823483
rs1260326	chr2	Metabolite levels	2e-07	rs1260326	None	None	2,076 European ancestry individuals	2p23.3	FNDC4	Affymetrix [at least 2500000] (imputed)	23823483
rs1260326	chr2	Metabolite levels	2e-06	rs1260326	None	None	2,076 European ancestry individuals	2p23.3	FNDC4	Affymetrix [at least 2500000] (imputed)	23823483
rs1260326	chr2	Metabolite levels	1e-09	rs1260326	None	None	2,076 European ancestry individuals	2p23.3	FNDC4	Affymetrix [at least 2500000] (imputed)	23823483
rs1260326	chr2	Metabolite levels	1e-07	rs1260326	None	None	2,076 European ancestry individuals	2p23.3	FNDC4	Affymetrix [at least 2500000] (imputed)	23823483
rs1260326	chr2	Metabolite levels	1e-06	rs1260326	None	None	2,076 European ancestry individuals	2p23.3	FNDC4	Affymetrix [at least 2500000] (imputed)	23823483
rs1260326	chr2	Hypertriglyceridemia	2e-13	rs1260326	None	0.26	1,122 Mexican ancestry cases, 1,118 Mexican ancestry controls	2p23.3	ZNF512, KRTCAP3, FNDC4, IFT172, GCKR, PPM1G, NRBP1, C2orf16	Illumina [1361436] (imputed)	23505323
rs1260326	chr2	Urate levels	1e-44	rs1260326	None	0.41	49,825 European ancestry males, 60,522 European ancestry females	2p23.3	GCKR	Affymetrix, Illumina, Perlegen [2450547] (imputed)	23263486
rs1260326	chr2	Lipoprotein-associated phospholipase A2 activity and mass	5e-06	rs1260326	None	0.44	6,851 European ancestry individuals	2p23.3	GCKR	Illumina [796174]	23118302
rs1260326	chr2	Serum total protein level	4e-06	rs1260326	None	0.56	Up to 25,539 European ancestry individuals, 10,168 Japanese ancestry individuals	2p23.3	FNDC4, GCKR	Affymetrix, Illumina [~ 2500000] (imputed)	23022100
rs1260326	chr2	Serum total protein level	6e-08	rs1260326	None	0.44	Up to 25,539 European ancestry individuals, 10,168 Japanese ancestry individuals	2p23.3	FNDC4, GCKR	Affymetrix, Illumina [~ 2500000] (imputed)	23022100
rs1260326	chr2	Serum albumin level	4e-19	rs1260326	None	0.41	Up to 53,190 European ancestry individuals, 9,380 Japanese ancestry individuals	2p23.3	GCKR-FNDC4	Affymetrix, Illumina [~ 2500000] (imputed)	23022100
rs1260326	chr2	Serum albumin level	2e-08	rs1260326	None	0.56	Up to 53,190 European ancestry individuals, 9,380 Japanese ancestry individuals	2p23.3	FNDC4, GCKR	Affymetrix, Illumina [~ 2500000] (imputed)	23022100
rs1260326	chr2	Serum albumin level	3e-14	rs1260326	None	0.41	Up to 53,190 European ancestry individuals, 9,380 Japanese ancestry individuals	2p23.3	FNDC4, GCKR	Affymetrix, Illumina [~ 2500000] (imputed)	23022100
rs1260326	chr2	White blood cell count	4e-78	rs1260326	None	0.575362	746,667 African American or Afro-Caribbean, African ancestry, European ancestry, East Asian ancestry, Hispanic or Latin American and South Asian ancestry individuals	2p23.3	None	Affymetrix, Illumina [24649327] (imputed)	32888493
rs1260326	chr2	Metabolite levels	1e-12	rs1260326	None	0.36	6,608 European ancestry individuals	2p23.3	GCKR	Illumina [~ 2000000] (imputed)	22916037
rs1260326	chr2	Red cell distribution width	2e-34	rs1260326	None	0.391091	563,352 African American or Afro-Caribbean, African ancestry, European ancestry, East Asian ancestry, Hispanic or Latin American and South Asian ancestry individuals	2p23.3	None	Affymetrix, Illumina [22063850] (imputed)	32888493
rs1260326	chr2	Non-albumin protein levels	3e-09	rs1260326	None	0.445	Up to 9,103 Japanese ancestry individuals	2p23.3	GCKR	Illumina [2178644] (imputed)	22558069
rs1260326	chr2	Platelet count	3e-118	rs1260326	None	0.575648	721,201 African American or Afro-Caribbean, African ancestry, European ancestry, East Asian ancestry, Hispanic or Latin American and South Asian ancestry individuals	2p23.3	None	Affymetrix, Illumina [24588908] (imputed)	32888493
rs1260326	chr2	Metabolite levels	3e-18	rs1260326	None	None	8,330 European ancestry individuals	2p23.3	GCKR	Illumina [~ 7700000] (imputed)	22286219
rs1260326	chr2	Platelet count	1e-22	rs1260326	None	0.556325	145,648 East Asian ancestry individuals	2p23.3	None	Affymetrix, Illumina [16710488] (imputed)	32888493
rs1260326	chr2	Platelet count	9e-10	rs1260326	None	None	38,891 European ancestry individuals, 1,661 Val Borbera (founder/genetic isolate) individuals, 521 Carlantino (founder/genetic isolate) individuals, 1,198 Friuli Venezia Giulia (founder/genetic isolate) individuals, 1,213 South Tyrolean (founder/genetic isolate) individuals, 890 Sorbian (founder/genetic isolate) individuals, 4,292 Sardinian (founder/genetic isolate) individuals	2p23.3	GCKR	Affymetrix, Illumina [~ 2500000] (imputed)	22139419
rs1260326	chr2	Neutrophil count	2e-62	rs1260326	None	0.588603	627,215 African American or Afro-Caribbean, African ancestry, European ancestry, East Asian ancestry, Hispanic or Latin American and South Asian ancestry individuals	2p23.3	None	Affymetrix, Illumina [23114412] (imputed)	32888493
rs1260326	chr2	Liver enzyme levels (gamma-glutamyl transferase)	4e-13	rs1260326	None	0.38	Up to 52,350 European ancestry individuals, up to 8,739 Indian Asian ancestry individuals	2p23.3	GCKR, C2orf16	Affymetrix, Illumina, Perlegen [~ 2600000] (imputed)	22001757
rs1260326	chr2	Lymphocyte counts	3e-41	rs1260326	None	0.586366	643,370 African American or Afro-Caribbean, African ancestry, European ancestry, East Asian ancestry, Hispanic or Latin American and South Asian ancestry individuals	2p23.3	None	Affymetrix, Illumina [23472807] (imputed)	32888493
rs1260326	chr2	Cardiovascular disease risk factors	2e-08	rs1260326	None	0.4	11,683 European ancestry individuals	2p23.3	GCKR	Illumina [NR] (imputed)	21943158
rs1260326	chr2	Lymphocyte counts	1e-35	rs1260326	None	0.602112	524,923 European ancestry individuals	2p23.3	None	Affymetrix, Illumina [50265552] (imputed)	32888493
rs1260326	chr2	C-reactive protein levels	5e-40	rs1260326	None	None	63,678 European ancestry individuals 1,792 Erasmus Rucphen individuals, 715 Orcadian individuals	2p23.3	GCKR	Affymetrix, Illumina [~ 2500000] (imputed)	21300955
rs1260326	chr2	Gestational insulin sensitivity	5e-12	rs1260326	None	None	1,126 Afro-Caribbean individuals, 1,380 European ancestry individuals, 830 Mexican-American individuals, 1,192 Thai ancestry individuals	2p23.3	GCKR	Illumina [6168240] (imputed)	32556615
rs1260326	chr2	Triglycerides	6e-133	rs1260326	None	0.41	96,598 European ancestry individuals	2p23.3	GCKR	Affymetrix, Illumina, Perlegen [~ 2600000] (imputed)	20686565
rs1260326	chr2	Type 2 diabetes	3e-42	rs1260326	None	0.5946	148,726 European ancestry cases, 965,732 European ancestry controls	2p23.3	None	Affymetrix, Illumina [1198787] (imputed)	32541925
rs1260326	chr2	Cholesterol, total	7e-27	rs1260326	None	0.41	100,184 European ancestry individuals	2p23.3	GCKR	Affymetrix, Illumina, Perlegen [~ 2600000] (imputed)	20686565
rs1260326	chr2	Type 2 diabetes	2e-57	rs1260326	None	0.5805	148,726 European ancestry cases, 24,646 African American cases, 8,616 Hispanic cases, 46,511 Asian ancestry cases, 965,732 European ancestry controls, 31,446 African American controls, 11,829 Hispanic controls, 169,776 Asian ancestry controls	2p23.3	None	Affymetrix, Illumina [at least 945603] (imputed)	32541925
rs1260326	chr2	Hypertriglyceridemia	7e-09	rs1260326	None	0.41	463 European ancestry cases, 1,197 European ancestry controls	2p23.3	GCKR	Affymetrix [~ 2100000] (imputed)	20657596
rs1260326	chr2	Type 2 diabetes	1e-21	rs1260326	None	0.456	77,418 East Asian cases, 356,122 East Asian controls	2p23.3	GCKR	Affymetrix, Illumina [11800000] (imputed)	32499647
rs1260326	chr2	Chronic kidney disease	3e-14	rs1260326	None	0.41	Up to 67,093 European ancestry individuals	2p23.3	FNDC4, IFT172, GCKR	Affymetrix, Illumina [~ 2500000] (imputed)	20383146
rs1260326	chr2	Problematic alcohol use (MTAG)	2e-42	rs1260326	None	0.5967	972,915 European ancestry individuals	2p23.3	None	Affymetrix [10613246] (imputed)	32451486
rs1260326	chr2	Triglycerides	1e-11	rs1260326	None	0.45	8,993 Japanese ancestry individuals	2p23.3	GCKR	Illumina [561583]	20139978
rs1260326	chr2	Problematic alcohol use	1e-20	rs1260326	None	0.4033	435,563 European ancestry individuals	2p23.3	GCKR	Affymetrix [14069427] (imputed)	32451486
rs1260326	chr2	Hematological and biochemical traits	4e-09	rs1260326	None	0.44	Up to 14,402 Japanese individuals	2p23.3	GCKR	Illumina [561583]	20139978
rs1260326	chr2	Alcohol consumption (drinks per week) (MTAG)	1e-45	rs1260326	None	0.595	972,915 European ancestry individuals	2p23.3	None	Affymetrix [NR] (imputed)	32451486
rs1260326	chr2	Two-hour glucose challenge	3e-10	rs1260326	None	None	15,234 individuals	2p23.3	GCKR	Affymetrix, Illumina [NR]	20081857
rs1260326	chr2	Liver fat content (MRI proton density fat fraction measure)	4e-08	rs1260326	None	0.39117	14,440 European ancestry individuals	2p23.3	GCKR	Affymetrix [~ 12000000] (imputed)	32247823
rs1260326	chr2	Lipid metabolism phenotypes	4e-32	rs1260326	None	None	Up to 17,296 European ancestry female individuals	2p23.3	GCKR	Illumina [335603]	19936222
rs1260326	chr2	Gout (combined type)	1e-08	rs1260326	None	0.545	905 Japanese ancestry male cases, 4,554 Japanese ancestry male controls	2p23.3	GCKR	Illumina [7206774] (imputed)	32238385
rs1260326	chr2	Lipid metabolism phenotypes	4e-24	rs1260326	None	None	Up to 17,296 European ancestry female individuals	2p23.3	GCKR	Illumina [335603]	19936222
rs1260326	chr2	Gout	2e-13	rs1260326	None	0.545	3,053 Japanese ancestry male cases, 4,554 Japanese ancestry male controls	2p23.3	GCKR	Illumina [7206774] (imputed)	32238385
rs1260326	chr2	Lipid metabolism phenotypes	3e-35	rs1260326	None	None	Up to 17,296 European ancestry female individuals	2p23.3	GCKR	Illumina [335603]	19936222
rs1260326	chr2	Refractive error	5e-10	rs1260326	None		542,934 European ancestry individuals	2p23.3	SNX17, GCKR	Affymetrix, Illumina [NR] (imputed)	32231278
rs1260326	chr2	Lipid metabolism phenotypes	3e-29	rs1260326	None	None	Up to 17,296 European ancestry female individuals	2p23.3	GCKR	Illumina [335603]	19936222
rs1260326	chr2	LDL cholesterol levels	6e-60	rs1260326	None	0.395558	440,546 European ancestry individuals	2p23.3	GCKR	Affymetrix [NR] (imputed)	32203549
rs1260326	chr2	Lipid metabolism phenotypes	3e-28	rs1260326	None	None	Up to 17,296 European ancestry female individuals	2p23.3	GCKR	Illumina [335603]	19936222
rs1260326	chr2	Apolipoprotein B levels	3e-121	rs1260326	None	0.395476	439,214 European ancestry individuals	2p23.3	GCKR	Affymetrix [NR] (imputed)	32203549
rs1260326	chr2	Lipid metabolism phenotypes	1e-37	rs1260326	None	None	Up to 17,296 European ancestry female individuals	2p23.3	GCKR	Illumina [335603]	19936222
rs1260326	chr2	Apolipoprotein A1 levels	4e-38	rs1260326	None	0.395328	393,193 European ancestry individuals	2p23.3	GCKR	Affymetrix [NR] (imputed)	32203549
rs1260326	chr2	Metabolic traits	4e-10	rs1260326	None	0.35	4,763 Northern Finnish founder individuals	2p23.3	GCKR	Illumina [329091]	19060910
rs1260326	chr2	Triglyceride levels	0	rs1260326	None	None	324,694 British ancestry individuals	2p23.3	GCKR	Affymetrix [5701386] (imputed)	32154731
rs1260326	chr2	Triglycerides	2e-31	rs1260326	None	0.45	19,840 European ancestry individuals	2p23.3	GCKR	Affymetrix, Illumina [~ 2600000] (imputed)	19060906
rs1260326	chr2	Low density lipoprotein cholesterol levels	4e-99	rs1260326	None	None	324,708 British ancestry individuals	2p23.3	GCKR	Affymetrix [5701386] (imputed)	32154731
rs1260326	chr2	Waist circumference and related phenotypes	4e-08	rs1260326	None	None	2,684 Indian Asian ancestry male individuals	2p23.3	GCKR	Illumina [308067]	18454146
rs1260326	chr2	Non-oily fish consumption	9e-09	rs1260326	None	None	335,576 European ancestry individuals	2p23.3	EIF2B4, SNX17, ZNF513, PPM1G, GCKR	Affymetrix [25921788] (imputed)	32066663
rs1260326	chr2	Alcohol consumption (heavy vs. light/non-drinkers)	1e-13	rs1260326	None	0.612	21,967 British ancestry cases, 103,282 British ancestry controls	2p23.3	GCKR	Affymetrix [11141077] (imputed)	31998841
rs1260326	chr2	Coffee consumption	1e-16	rs1260326	None	None	152,634 Japanese ancestry individuals	2p23.3	GCKR	Illumina [6108828] (imputed)	31959922
rs1260326	chr2	Alcohol consumption (drinkers vs non-drinkers)	2e-13	rs1260326	None	None	83,713 Japanese ancestry ever drinkers, 81,371 Japanese ancestry never drinkers	2p23.3	GCKR	Illumina [6108828] (imputed)	31959922
rs1260326	chr2	C-reactive protein levels	2e-283	rs1260326	None	0.392838	418,642 British ancestry individuals	2p23.3	None	NR [NR]	31900758
rs1260326	chr2	Coffee consumption (cups per day)	2e-08	rs1260326	None	0.61	227,666 British ancestry individuals	2p23.3	GCKR	NR [NR]	31837886
rs1260326	chr2	Appendicular lean mass	2e-13	rs1260326	None	0.605242	85,750 European ancestry middle-aged adult individuals	2p23.3	None	Affymetrix [21375087] (imputed)	31761296
rs1260326	chr2	Appendicular lean mass	1e-18	rs1260326	None	0.605637	181,862 European ancestry elderly individuals	2p23.3	None	Affymetrix [17914406] (imputed)	31761296
rs1260326	chr2	Triglyceride levels x short total sleep time interaction (2df test)	3e-100	rs1260326	None	None	2,990 African American short sleepers, 369 Chinese ancestry short sleepers, 114 Asian ancestry short sleepers, at least 8,300 European ancestry short sleepers, 1,082 Hispanic/Latino short sleepers, at least 11,842 African American controls, 1,444 Chinese ancestry controls, 452 Asian ancestry controls, at least 31,350 European ancestry controls, 4,047 Hispanic/Latino controls	2p23.3	GCKR	Affymetrix, Illumina [up to 2533153] (imputed)	31719535
rs1260326	chr2	Triglyceride levels x long total sleep time interaction (2df test)	5e-116	rs1260326	None	None	at least 2,926 African American long sleepers, 364 Chinese ancestry long sleepers, 112 Asian ancestry long sleepers, at least 7,664 European ancestry long sleepers, 1,038 Hispanic/Latino long sleepers, up to 11,906 African American controls, 1,449 Chinese ancestry controls, 454 Asian ancestry controls, at least 31,986 European ancestry controls, 4,091 Hispanic/Latino controls	2p23.3	GCKR	Affymetrix, Illumina [up to 2533153] (imputed)	31719535
rs1260326	chr2	Serum alkaline phosphatase levels	5e-11	rs1260326	None	0.341	162,774 Icelandic ancestry individuals	2p23.3	GCKR	Illumina [NR] (imputed)	31666285
rs1260326	chr2	Triglyceride levels	3e-07	rs1260326	None	None	281 African American individuals from 73 families, 516 European American individuals from 75 families, 125 East Asian ancestry individuals from 15 families, 598 Mexican American individuals from 96 families	2p23.3	GCKR	Illumina [3153931] (imputed)	31647587
rs1260326	chr2	Serum metabolite levels (CMS)	8e-20	rs1260326	None	None	6,263 Finnish ancestry men	2p23.3	GCKR	Illumina [609262]	31636271
rs1260326	chr2	Serum metabolite levels (CMS)	8e-11	rs1260326	None	None	6,263 Finnish ancestry men	2p23.3	GCKR	Illumina [609262]	31636271
rs1260326	chr2	Serum metabolite levels (CMS)	6e-10	rs1260326	None	None	6,263 Finnish ancestry men	2p23.3	GCKR	Illumina [609262]	31636271
rs1260326	chr2	Serum metabolite levels (CMS)	5e-14	rs1260326	None	None	6,263 Finnish ancestry men	2p23.3	GCKR	Illumina [609262]	31636271
rs1260326	chr2	Serum metabolite levels (CMS)	5e-13	rs1260326	None	None	6,263 Finnish ancestry men	2p23.3	GCKR	Illumina [609262]	31636271
rs1260326	chr2	Serum metabolite levels (CMS)	5e-12	rs1260326	None	None	6,263 Finnish ancestry men	2p23.3	GCKR	Illumina [609262]	31636271
rs1260326	chr2	Serum metabolite levels (CMS)	3e-15	rs1260326	None	None	6,263 Finnish ancestry men	2p23.3	GCKR	Illumina [609262]	31636271
rs1260326	chr2	Serum metabolite levels (CMS)	3e-14	rs1260326	None	None	6,263 Finnish ancestry men	2p23.3	GCKR	Illumina [609262]	31636271
rs1260326	chr2	Serum metabolite levels (CMS)	2e-13	rs1260326	None	None	6,263 Finnish ancestry men	2p23.3	GCKR	Illumina [609262]	31636271
rs1260326	chr2	Serum metabolite levels (CMS)	2e-12	rs1260326	None	None	6,263 Finnish ancestry men	2p23.3	GCKR	Illumina [609262]	31636271
rs1260326	chr2	Serum metabolite levels (CMS)	2e-10	rs1260326	None	None	6,263 Finnish ancestry men	2p23.3	GCKR	Illumina [609262]	31636271
rs1260326	chr2	Serum metabolite levels (CMS)	1e-09	rs1260326	None	None	6,263 Finnish ancestry men	2p23.3	GCKR	Illumina [609262]	31636271
rs1260326	chr2	Serum metabolite levels (CMS)	1e-12	rs1260326	None	None	6,263 Finnish ancestry men	2p23.3	GCKR	Illumina [609262]	31636271
rs1260326	chr2	Serum metabolite levels (CMS)	1e-11	rs1260326	None	None	6,263 Finnish ancestry men	2p23.3	GCKR	Illumina [609262]	31636271
rs560887	chr2	Hemoglobin A1c levels	5e-09	rs560887	None	None	559 African American individuals, 10,408 Hispanic/Latino individuals, 92 Asian ancestry individuals, 4 Native American ancestry individuals, 115 individuals	2q31.1	None	Illumina [22871999] (imputed)	31217584
rs560887	chr2	Fasting blood glucose	9e-35	rs560887	None	None	6,457 African American individuals, 13,556 Hispanic/Latino individuals, 1,918 Asian ancestry individuals, 1,400 Native Hawaiian ancestry individuals, 412 Native American ancestry individuals, 168 individuals	2q31.1	None	Illumina [29713514] (imputed)	31217584
rs560887	chr2	Offspring birth weight	1e-14	rs560887	None	0.700833	210,267 European ancestry individuals, 19,802 individuals	2q31.1	G6PC2	Affymetrix, Illumina [14869762] (imputed)	31043758
rs560887	chr2	Pulse pressure	4e-19	rs560887	None	0.2971	757,601 European ancestry individuals	2q31.1	G6PC2	Affymetrix, Illumina [~ 7100000] (imputed)	30224653
rs560887	chr2	Glycated hemoglobin levels	1e-58	rs560887	None	0.6843	88,355 European ancestry individuals	2q31.1	G6PC2	Affymetrix, Illumina, Perlegen [~ 2500000] (imputed)	28898252
rs560887	chr2	Fasting plasma glucose	6e-68	rs560887	None	0.2907	15,226 British ancestry non-diabetics individuals from 6863 families, 948 British ancestry diabetic individuals from 6863 families.	2q31.1	G6PC2	Illumina [24111857] (imputed)	28270201
rs560887	chr2	Fasting plasma glucose	2e-75	rs560887	None	0.2907	15,226 British ancestry non-diabetics individuals from 6863 families, 948 British ancestry diabetic individuals from 6863 families.	2q31.1	G6PC2	Illumina [24111857] (imputed)	28270201
rs560887	chr2	Metabolite levels (small molecules and protein measures)	3e-32	rs560887	None	0.7	2,118 Erasmus Rucphen (founder/genetic isolate), 22,807 European ancestry individuals	2q31.1	G6PC2	Affymetrix, Illumina, Perlegen [12133295] (imputed)	27005778
rs560887	chr2	Fasting blood glucose	4e-87	rs560887	None	0.258484	50,900 European ancestry non-diabetic individuals, 9,664 African American non-diabetic individuals	2q31.1	G6PC2	Illumina [197481]	25631608
rs560887	chr2	Glycated hemoglobin levels	1e-17	rs560887	None	0.33	4,088 European ancestry non-diabetic elderly individuals	2q31.1	G6PC2	Illumina [9250000] (imputed)	24405752
rs560887	chr2	Glycemic traits (pregnancy)	2e-16	rs560887	None	0.291	1,367 European ancestry individuals, 817 Hispanic individuals, 1,075 Afro-Caribbean individuals, 1,178 Thai ancestry individuals	2q31.1	G6PC2	Illumina [up to 945994] (imputed)	23903356
rs560887	chr2	Metabolite levels	4e-15	rs560887	None	0.31	6,608 European ancestry individuals	2q31.1	G6PC2	Illumina [~ 2000000] (imputed)	22916037
rs560887	chr2	Fasting blood glucose (BMI interaction)	2e-113	rs560887	None	0.2965	Up to 58,074 European ancestry individuals	2q31.1	G6PC2	Affymetrix, Illumina [~ 2400000] (imputed)	22581228
rs560887	chr2	Fasting blood glucose	3e-99	rs560887	None	0.2987	Up to 58,074 European ancestry individuals	2q31.1	G6PC2	Affymetrix, Illumina [~ 2400000] (imputed)	22581228
rs560887	chr2	Fasting plasma glucose	2e-06	rs560887	None	0.2	2,349 European ancestry individuals, 664 Chinese ancestry individuals, 1,366 African American individuals, 1,171 Hispanic individuals	2q31.1	G6PC2	Affymetrix [NR] (imputed)	22508271
rs560887	chr2	Metabolic syndrome	5e-26	rs560887	None	0.69	2,637 European ancestry cases, 7,927 European ancestry controls	2q31.1	G6PC2	Illumina [1257079] (imputed)	22399527
rs560887	chr2	Metabolite levels	2e-17	rs560887	None	None	8,330 European ancestry individuals	2q31.1	G6PC2	Illumina [~ 7700000] (imputed)	22286219
rs560887	chr2	Homeostasis model assessment of beta-cell function	2e-66	rs560887	None	0.7	36,466 European ancestry individuals	2q31.1	G6PC2	Affymetrix, Illumina [~ 2500000] (imputed)	20081858
rs560887	chr2	Fasting blood glucose	9e-218	rs560887	None	0.7	46,186 European ancestry individuals	2q31.1	G6PC2	Affymetrix, Illumina [~ 2500000] (imputed)	20081858
rs560887	chr2	Metabolic traits	6e-10	rs560887	None	0.31	4,763 Northern Finnish founder individuals	2q31.1	G6PC2, ABCB11	Illumina [329091]	19060910
rs560887	chr2	Fasting plasma glucose	1e-57	rs560887	None	0.7	35,812 European ancestry individuals	2q31.1	G6PC2	Affymetrix, Illumina, Perlegen [up to 2557249] (imputed)	19060907
rs560887	chr2	Fasting plasma glucose	4e-23	rs560887	None	0.3	654 European ancestry individuals	2q31.1	G6PC2	Illumina [392935]	18451265
rs6517656	chr21	Glycemic traits (pregnancy)	6e-16	rs6517656	None	0.839	1,367 European ancestry individuals, 817 Hispanic individuals, 1,075 Afro-Caribbean individuals, 1,178 Thai ancestry individuals	21q22.3	BACE2, PLAC4, C21orf130, FAM3B	Illumina [up to 945994] (imputed)	23903356
rs1801282	chr3	Body mass index	2e-09	rs1801282	None	None	315,347 European ancestry individuals, 8,322 Hispanic/Latino individuals, 7,290 East Asian ancestry individuals, 3,069 African American individuals, 459 South Asian ancestry individuals	3p25.2	None	Affymetrix [at least 28613428] (imputed)	30108127
rs1801282	chr3	Type 2 diabetes (adjusted for BMI)	1e-16	rs1801282	None	0.871	up to 48,286 European ancestry cases, up to 250,671 European ancestry controls	3p25.2	PPARG	Affymetrix, Illumina [247470]	29632382
rs1801282	chr3	Type 2 diabetes (adjusted for BMI)	3e-19	rs1801282	None	0.887	48,286 European ancestry cases, 250,671 European ancestry controls, 33,126 African American, East Asian, Hispanic/Latino or South Asian cases, 120,161 African American, East Asian, Hispanic/Latino or South Asian controls	3p25.2	PPARG	Affymetrix, Illumina [247470]	29632382
rs1801282	chr3	Type 2 diabetes	5e-12	rs1801282	None	0.871	up to 48,286 European ancestry cases, up to 250,671 European ancestry controls	3p25.2	PPARG	Affymetrix, Illumina [247470]	29632382
rs1801282	chr3	Type 2 diabetes	1e-17	rs1801282	None	0.887	48,286 European ancestry cases, 250,671 European ancestry controls, 33,126 African American, East Asian, Hispanic/Latino or South Asian cases, 120,161 African American, East Asian, Hispanic/Latino or South Asian controls	3p25.2	PPARG	Affymetrix, Illumina [247470]	29632382
rs1801282	chr3	Body mass index	1e-16	rs1801282	None	0.1183	up to 449,889 European ancestry individuals, up to 29,398 South Asian ancestry individuals, up to 27,610 African American individuals, up to 8,839 East Asian individuals, up to 10,772 Hispanic ancestry individuals	3p25.2	PPARG	Illumina [246328]	29273807
rs1801282	chr3	Type 2 diabetes	2e-19	rs1801282	None	0.1203	6,353 South Asian ancestry cases, 7,179 South Asian ancestry controls, 3,871 European ancestry cases, 16,427 European ancestry controls, 34,840 cases, 114,981 controls	3p25.2	PPARG	Affymetrix, Illumina [NR] (imputed)	28869590
rs1801282	chr3	Type 2 diabetes	2e-14	rs1801282	None	0.1203	6,353 South Asian ancestry cases, 7,179 South Asian ancestry controls, 3,871 European ancestry cases, 16,427 European ancestry controls, 34,840 cases, 114,981 controls	3p25.2	PPARG	Affymetrix, Illumina [NR] (imputed)	28869590
rs1801282	chr3	Fasting blood insulin adjusted for BMI	1e-07	rs1801282	None	None	up to 30,825 non-diabetic individuals	3p25.2	PPARG	Illumina [106489]	25625282
rs1801282	chr3	Type 2 diabetes	6e-10	rs1801282	None	0.88	12,171 European ancestry cases, 56,862 European ancestry controls, 6,952 East Asian ancestry cases, 11,865 East Asian ancestry controls, 5,561 South Asian ancestry cases, 14,458 South Asian ancestry controls, 1,804 Mexican ancestry cases, 779 Mexican ancestry controls	3p25.2	PPARG	Affymetrix, Illumina [2500000] (imputed)	24509480
rs1801282	chr3	Type 2 diabetes	1e-12	rs1801282	None	0.855203	6,377 European ancestry male cases, 5,794 European ancestry female cases, 22,243 European ancestry male controls, 34,619 European ancestry female controls	3p25.2	PPARG	Affymetrix, Illumina [up to 2500000] (imputed)	22885922
rs1801282	chr3	Fasting blood insulin (BMI interaction)	2e-07	rs1801282	None	0.8725	Up to 51,750 European ancestry individuals	3p25.2	PPARG	Affymetrix, Illumina [~ 2400000] (imputed)	22581228
rs1801282	chr3	Type 2 diabetes	2e-06	rs1801282	None	None	1,924 European ancestry cases, 2,938 European ancestry controls	3p25.2	PPARG	Affymetrix [393453]	17463249
rs1801282	chr3	Type 2 diabetes	2e-06	rs1801282	None	0.82	1,161 European ancestry cases, 1,174 European ancestry controls	3p25.2	PPARG	Illumina [315635]	17463248
rs1801282	chr3	Type 2 diabetes	2e-06	rs1801282	None	0.86	1,464 European ancestry cases, 1,467 European ancestry controls	3p25.2	PPARG	Affymetrix [386731]	17463246
rs11708067	chr3	Type 2 diabetes	2e-11	rs11708067	None	0.151	24,646 African American cases, 31,446 African American controls	3q21.1	None	Affymetrix, Illumina [945603] (imputed)	32541925
rs11708067	chr3	Type 2 diabetes	2e-46	rs11708067	None	0.2286	148,726 European ancestry cases, 965,732 European ancestry controls	3q21.1	None	Affymetrix, Illumina [1198787] (imputed)	32541925
rs11708067	chr3	Type 2 diabetes	2e-57	rs11708067	None	0.2229	148,726 European ancestry cases, 24,646 African American cases, 8,616 Hispanic cases, 46,511 Asian ancestry cases, 965,732 European ancestry controls, 31,446 African American controls, 11,829 Hispanic controls, 169,776 Asian ancestry controls	3q21.1	None	Affymetrix, Illumina [at least 945603] (imputed)	32541925
rs11708067	chr3	C-reactive protein levels	2e-09	rs11708067	None	0.755205	418,642 British ancestry individuals	3q21.1	None	NR [NR]	31900758
rs11708067	chr3	Birth weight (MTAG)	4e-25	rs11708067	None	0.77	up to 182,902 European ancestry individuals	3q21.1	None	NR [1977400] (imputed)	31681408
rs11708067	chr3	Birth length (MTAG)	9e-20	rs11708067	None	0.774	up to 182,902 European ancestry individuals	3q21.1	None	NR [1977400] (imputed)	31681408
rs11708067	chr3	Birth weight	6e-24	rs11708067	None	0.24	188,039 European ancestry individuals	3q21.1	None	Affymetrix [up to 10400000] (imputed)	31097437
rs11708067	chr3	Birth weight	2e-42	rs11708067	None	0.237762	298,142 European ancestry individuals, 6,635 African American individuals, 1,449 Filipino individuals, 420 Turkish individuals, 365 Moroccan individuals, 395 Surinamese individuals, 1,052 Afro-Caribbean individuals, 612 Hispanic individuals, 1,180 Thai individuals, 840 Chinese ancestry individuals, 10,133 individuals	3q21.1	ADCY5	Affymetrix, Illumina [15144367] (imputed)	31043758
rs11708067	chr3	Glycemic traits (pleiotropy)	3e-08	rs11708067	None	None	46,186 European ancestry individuals	3q21.1	ADCY5	NR [NR]	31021400
rs11708067	chr3	Type 2 diabetes	5e-32	rs11708067	None	0.7723	74,124 European ancestry cases, 824,006 European ancestry controls	3q21.1	ADCY5	Affymetrix, Illumina [~ 27000000] (imputed)	30297969
rs11708067	chr3	Type 2 diabetes	6e-29	rs11708067	None	0.23899	61,714 European ancestry cases, 1,178 Pakistani ancestry cases, 593,952 European ancestry controls, 2,472 Pakistani ancestry controls	3q21.1	ADCY5	NR [5035015] (imputed)	30054458
rs11708067	chr3	Type 2 diabetes	3e-06	rs11708067	None	None	19,693 European ancestry cases, 107,308 European ancestry controls, 6,952 East Asian ancestry cases, 11,865 East Asian ancestry controls, 5,561 South Asian ancestry cases, 14,458 South Asian ancestry controls, 1,804 Mexican ancestry cases, 779 Mexican ancestry controls	3q21.1	ADCY5	Affymetrix, Illumina [1918233] (imputed)	29358691
rs11708067	chr3	Total cholesterol levels	2e-12	rs11708067	None	None	up to 237,050 European ancestry individuals, up to 16,935 African ancestry individuals, up to 30,468 South Asian ancestry individuals, up to 8,287 East Asian ancestry individuals, 5,084 Hispanic individuals	3q21.1	ADCY5	Illumina [242289]	29083408
rs11708067	chr3	Total cholesterol levels	6e-06	rs11708067	None	0.22	up to 237,050 European ancestry individuals	3q21.1	None	Illumina [242289]	29083408
rs11708067	chr3	Glycated hemoglobin levels	1e-12	rs11708067	None	0.7542	88,355 European ancestry individuals	3q21.1	ADCY5	Affymetrix, Illumina, Perlegen [~ 2500000] (imputed)	28898252
rs11708067	chr3	Type 2 diabetes	5e-20	rs11708067	None	0.171	6,353 South Asian ancestry cases, 7,179 South Asian ancestry controls, 3,871 European ancestry cases, 16,427 European ancestry controls, 34,840 cases, 114,981 controls	3q21.1	ADCY5	Affymetrix, Illumina [NR] (imputed)	28869590
rs11708067	chr3	Type 2 diabetes	2e-17	rs11708067	None	0.171	6,353 South Asian ancestry cases, 7,179 South Asian ancestry controls, 3,871 European ancestry cases, 16,427 European ancestry controls, 34,840 cases, 114,981 controls	3q21.1	ADCY5	Affymetrix, Illumina [NR] (imputed)	28869590
rs11708067	chr3	Fasting blood glucose	4e-16	rs11708067	None	0.213382	50,900 European ancestry non-diabetic individuals, 9,664 African American non-diabetic individuals	3q21.1	ADCY5	Illumina [197481]	25631608
rs11708067	chr3	Type 2 diabetes	4e-07	rs11708067	None	None	6,377 European ancestry male cases, 5,794 European ancestry female cases, 22,243 European ancestry male controls, 34,619 European ancestry female controls	3q21.1	ADCY5	Affymetrix, Illumina [up to 2500000] (imputed)	22885922
rs11708067	chr3	Type 2 diabetes	2e-10	rs11708067	None	None	6,377 European ancestry male cases, 5,794 European ancestry female cases, 22,243 European ancestry male controls, 34,619 European ancestry female controls	3q21.1	ADCY5	Affymetrix, Illumina [up to 2500000] (imputed)	22885922
rs11708067	chr3	Type 2 diabetes	6e-08	rs11708067	None	0.78	2,112 lean type 2 diabetes cases, 4,123 obese type 2 diabetes cases, 54,412 controls	3q21.1	ADCY5	NR [NR]	22693455
rs11708067	chr3	Fasting blood glucose (BMI interaction)	4e-10	rs11708067	None	0.7879	Up to 58,074 European ancestry individuals	3q21.1	ADCY5	Affymetrix, Illumina [~ 2400000] (imputed)	22581228
rs11708067	chr3	Fasting blood glucose	7e-09	rs11708067	None	0.7884	Up to 58,074 European ancestry individuals	3q21.1	ADCY5	Affymetrix, Illumina [~ 2400000] (imputed)	22581228
rs11708067	chr3	Homeostasis model assessment of beta-cell function	3e-12	rs11708067	None	0.78	36,466 European ancestry individuals	3q21.1	ADCY5	Affymetrix, Illumina [~ 2500000] (imputed)	20081858
rs11708067	chr3	Fasting blood glucose	7e-22	rs11708067	None	0.78	46,186 European ancestry individuals	3q21.1	ADCY5	Affymetrix, Illumina [~ 2500000] (imputed)	20081858
rs11920090	chr3	Fasting blood glucose	5e-08	rs11920090	None	0.16523	50,900 European ancestry non-diabetic individuals, 9,664 African American non-diabetic individuals	3q26.2	SLC2A2	Illumina [197481]	25631608
rs11920090	chr3	Fasting blood glucose (BMI interaction)	8e-11	rs11920090	None	0.1352	Up to 58,074 European ancestry individuals	3q26.2	SLC2A2	Affymetrix, Illumina [~ 2400000] (imputed)	22581228
rs11920090	chr3	Fasting blood glucose	2e-09	rs11920090	None	0.1366	Up to 58,074 European ancestry individuals	3q26.2	SLC2A2	Affymetrix, Illumina [~ 2400000] (imputed)	22581228
rs11920090	chr3	Homeostasis model assessment of beta-cell function	5e-06	rs11920090	None	0.87	36,466 European ancestry individuals	3q26.2	SLC2A2	Affymetrix, Illumina [~ 2500000] (imputed)	20081858
rs11920090	chr3	Fasting blood glucose	8e-13	rs11920090	None	0.87	46,186 European ancestry individuals	3q26.2	SLC2A2	Affymetrix, Illumina [~ 2500000] (imputed)	20081858
rs6235	chr5	Body mass index	9e-15	rs6235	None	None	457,822 European ancestry individuals	5q15	None	Affymetrix [~ 8270000] (imputed)	31669095
rs6235	chr5	Body mass index	1e-15	rs6235	None	None	approximately 458,000 European ancestry individuals	5q15		NR [~ 8900000] (imputed)	30595370
rs6235	chr5	Fat-free mass	4e-06	rs6235	None	None	70,700 European ancestry female individuals, 85,261 European ancestry male individuals	5q15	None	Affymetrix [7794483] (imputed)	30593698
rs6235	chr5	Fat-free mass	3e-08	rs6235	None	None	70,700 European ancestry female individuals, 85,261 European ancestry male individuals	5q15	None	Affymetrix [7794483] (imputed)	30593698
rs6235	chr5	Body mass index	4e-20	rs6235	None	0.7335	374,756 European ancestry male individuals	5q15	NA	NR [~ 27400000] (imputed)	30239722
rs6235	chr5	Glycemic traits (pregnancy)	5e-15	rs6235	None	0.272	1,367 European ancestry individuals, 817 Hispanic individuals, 1,075 Afro-Caribbean individuals, 1,178 Thai ancestry individuals	5q15	PCSK1	Illumina [up to 945994] (imputed)	23903356
rs6235	chr5	Fasting blood proinsulin levels	2e-08	rs6235	None	0.282	up to 8,229 Finnish ancestry non-diabetic individuals	5q15	PCSK1	Illumina [242071]	23263489
rs6235	chr5	Proinsulin levels	1e-26	rs6235	None	0.28	10,701 European ancestry individuals	5q15	PCSK1	Affymetrix, Illumina [~ 2500000] (imputed)	21873549
rs9379084	chr6	Type 2 diabetes	4e-22	rs9379084	None	0.8803	148,726 European ancestry cases, 965,732 European ancestry controls	6p24.3	None	Affymetrix, Illumina [1198787] (imputed)	32541925
rs9379084	chr6	Type 2 diabetes	5e-31	rs9379084	None	0.843	148,726 European ancestry cases, 24,646 African American cases, 8,616 Hispanic cases, 46,511 Asian ancestry cases, 965,732 European ancestry controls, 31,446 African American controls, 11,829 Hispanic controls, 169,776 Asian ancestry controls	6p24.3	None	Affymetrix, Illumina [at least 945603] (imputed)	32541925
rs9379084	chr6	Type 2 diabetes	2e-14	rs9379084	None	0.799	77,418 East Asian cases, 356,122 East Asian controls	6p24.3	SSR1, RREB1	Affymetrix, Illumina [11800000] (imputed)	32499647
rs9379084	chr6	Height	8e-30	rs9379084	None	None	159,095 Japanese ancestry individuals	6p24.3	RREB1	Illumina [27896057] (imputed)	31562340
rs9379084	chr6	Offspring birth weight	1e-16	rs9379084	None	0.883436	210,267 European ancestry individuals, 19,802 individuals	6p24.3	RREB1	Affymetrix, Illumina [14869762] (imputed)	31043758
rs9379084	chr6	Birth weight	1e-07	rs9379084	None	0.882647	298,142 European ancestry individuals, 6,635 African American individuals, 1,449 Filipino individuals, 420 Turkish individuals, 365 Moroccan individuals, 395 Surinamese individuals, 1,052 Afro-Caribbean individuals, 612 Hispanic individuals, 1,180 Thai individuals, 840 Chinese ancestry individuals, 10,133 individuals	6p24.3	RREB1	Affymetrix, Illumina [15144367] (imputed)	31043758
rs9379084	chr6	Medication use (drugs used in diabetes)	3e-08	rs9379084	None	0.104171	15,272 European ancestry cases, 29,0641 European ancestry controls	6p24.3	RREB1	Affymetrix [7288503] (imputed)	31015401
rs9379084	chr6	Heel bone mineral density	1e-30	rs9379084	None	0.895148	426,824 British ancestry individuals	6p24.3	RREB1	NR [13737936] (imputed)	30598549
rs9379084	chr6	Type 2 diabetes	2e-15	rs9379084	None	None	approximately 459,000 European ancestry individuals	6p24.3		NR [~ 8900000] (imputed)	30595370
rs9379084	chr6	Height	4e-65	rs9379084	None	None	approximately 458,000 European ancestry individuals	6p24.3		NR [~ 8900000] (imputed)	30595370
rs9379084	chr6	Heel bone mineral density	8e-36	rs9379084	None	None	approximately 446,000 European ancestry individuals	6p24.3		NR [~ 8900000] (imputed)	30595370
rs9379084	chr6	Type 2 diabetes	3e-21	rs9379084	None	0.8873	74,124 European ancestry cases, 824,006 European ancestry controls	6p24.3	RREB1	Affymetrix, Illumina [~ 27000000] (imputed)	30297969
rs9379084	chr6	Heel bone mineral density	5e-36	rs9379084	None	None	394,929 European ancestry individuals	6p24.3		Affymetrix [20259828] (imputed)	30048462
rs9379084	chr6	Type 2 diabetes (adjusted for BMI)	2e-13	rs9379084	None	0.887	up to 48,286 European ancestry cases, up to 250,671 European ancestry controls	6p24.3	RREB1	Affymetrix, Illumina [247470]	29632382
rs9379084	chr6	Type 2 diabetes (adjusted for BMI)	2e-17	rs9379084	None	0.884	48,286 European ancestry cases, 250,671 European ancestry controls, 33,126 African American, East Asian, Hispanic/Latino or South Asian cases, 120,161 African American, East Asian, Hispanic/Latino or South Asian controls	6p24.3	RREB1	Affymetrix, Illumina [247470]	29632382
rs9379084	chr6	Type 2 diabetes	2e-12	rs9379084	None	0.887	up to 48,286 European ancestry cases, up to 250,671 European ancestry controls	6p24.3	RREB1	Affymetrix, Illumina [247470]	29632382
rs9379084	chr6	Type 2 diabetes	1e-13	rs9379084	None	0.884	48,286 European ancestry cases, 250,671 European ancestry controls, 33,126 African American, East Asian, Hispanic/Latino or South Asian cases, 120,161 African American, East Asian, Hispanic/Latino or South Asian controls	6p24.3	RREB1	Affymetrix, Illumina [247470]	29632382
rs9379084	chr6	Breast cancer	3e-06	rs9379084	None	0.1206	76,192 European ancestry cases, 63,082 European ancestry controls	6p24.3	None	Illumina [~ 11800000] (imputed)	29059683
rs9379084	chr6	Heel bone mineral density	6e-09	rs9379084	None	0.883136	76,067 European ancestry women, 66,420 European ancestry men	6p24.3	RREB1	NR [17166351] (imputed)	28869591
rs9379084	chr6	Heel bone mineral density	3e-15	rs9379084	None	0.882997	76,067 European ancestry women, 66,420 European ancestry men	6p24.3	RREB1	NR [17166351] (imputed)	28869591
rs9379084	chr6	Heel bone mineral density	4e-07	rs9379084	None	0.882837	76,067 European ancestry women, 66,420 European ancestry men	6p24.3	RREB1	NR [17166351] (imputed)	28869591
rs9379084	chr6	Height	1e-07	rs9379084	None	0.1228	1,249 whole genome sequenced European ancestry individuals, 3,541 whole genome sequenced individuals, 46,910 European ancestry individuals, 471 Carlantino (founder/genetic isolate) individuals, 1,197 Friuli Venezia Giulia (founder/genetic isolate) individuals, 1,043 Mylopotamos (founder/genetic isolate) individuals, 933 Pomak (founder/genetic isolate) individuals, 1,785 Val Borbera (founder/genet…	6p24.3	RREB1	Affymetrix, Illumina, Perlegen [15844966] (imputed)	28552196
rs9465871	chr6	Prevalent type 2 diabetes	6e-08	rs9465871	None	None	911 Korean ancestry prevalent diabetes cases, 7,024 Korean ancestry incident diabetes and non-diabetes controls	6p22.3	CDKAL1	Affymetrix [352228]	28406950
rs9465871	chr6	Type 2 diabetes	3e-07	rs9465871	None	0.18	1,924 European ancestry cases, 2,938 European ancestry controls	6p22.3	CDKAL1	Affymetrix [469557]	17554300
rs2191349	chr7	Type 2 diabetes	6e-48	rs2191349	None	0.461	148,726 European ancestry cases, 965,732 European ancestry controls	7p21.2	None	Affymetrix, Illumina [1198787] (imputed)	32541925
rs2191349	chr7	Fasting blood glucose	7e-07	rs2191349	None	None	6,457 African American individuals, 13,556 Hispanic/Latino individuals, 1,918 Asian ancestry individuals, 1,400 Native Hawaiian ancestry individuals, 412 Native American ancestry individuals, 168 individuals	7p21.2	None	Illumina [29713514] (imputed)	31217584
rs2191349	chr7	Glycated hemoglobin levels	2e-07	rs2191349	None	0.532	88,355 European ancestry individuals	7p21.2	DGKB	Affymetrix, Illumina, Perlegen [~ 2500000] (imputed)	28898252
rs2191349	chr7	Type 2 diabetes	1e-09	rs2191349	None	0.505	6,353 South Asian ancestry cases, 7,179 South Asian ancestry controls, 3,871 European ancestry cases, 16,427 European ancestry controls, 34,840 cases, 114,981 controls	7p21.2	DGKB	Affymetrix, Illumina [NR] (imputed)	28869590
rs2191349	chr7	Type 2 diabetes	1e-06	rs2191349	None	0.505	6,353 South Asian ancestry cases, 7,179 South Asian ancestry controls, 3,871 European ancestry cases, 16,427 European ancestry controls, 34,840 cases, 114,981 controls	7p21.2	DGKB	Affymetrix, Illumina [NR] (imputed)	28869590
rs2191349	chr7	Fasting blood glucose	4e-12	rs2191349	None	0.452877	50,900 European ancestry non-diabetic individuals, 9,664 African American non-diabetic individuals	7p21.2	DGKB, TMEM195	Illumina [197481]	25631608
rs2191349	chr7	Fasting blood glucose (BMI interaction)	3e-21	rs2191349	None	0.5315	Up to 58,074 European ancestry individuals	7p21.2	DGKB	Affymetrix, Illumina [~ 2400000] (imputed)	22581228
rs2191349	chr7	Fasting blood glucose	2e-20	rs2191349	None	0.526	Up to 58,074 European ancestry individuals	7p21.2	DGKB	Affymetrix, Illumina [~ 2400000] (imputed)	22581228
rs2191349	chr7	Homeostasis model assessment of beta-cell function	3e-17	rs2191349	None	0.52	36,466 European ancestry individuals	7p21.2	TMEM195, DGKB	Affymetrix, Illumina [~ 2500000] (imputed)	20081858
rs2191349	chr7	Fasting blood glucose	3e-44	rs2191349	None	0.52	46,186 European ancestry individuals	7p21.2	TMEM195, DGKB	Affymetrix, Illumina [~ 2500000] (imputed)	20081858
rs4607517	chr7	Serum metabolite levels (CMS)	3e-08	rs4607517	None	None	6,263 Finnish ancestry men	7p13	YKT6	Illumina [609262]	31636271
rs4607517	chr7	Serum metabolite levels	7e-10	rs4607517	None	None	6,263 Finnish ancestry men	7p13	YKT6	Illumina [609262]	31636271
rs4607517	chr7	Fasting blood glucose	2e-21	rs4607517	None	None	6,457 African American individuals, 13,556 Hispanic/Latino individuals, 1,918 Asian ancestry individuals, 1,400 Native Hawaiian ancestry individuals, 412 Native American ancestry individuals, 168 individuals	7p13	None	Illumina [29713514] (imputed)	31217584
rs4607517	chr7	Glycated hemoglobin levels	9e-38	rs4607517	None	0.2017	88,355 European ancestry individuals	7p13	GCK	Affymetrix, Illumina, Perlegen [~ 2500000] (imputed)	28898252
rs4607517	chr7	Glycated hemoglobin levels	9e-15	rs4607517	None	0.2492	18,472 East Asian ancestry individuals	7p13	GCK	Affymetrix, Illumina, Perlegen [~ 2500000] (imputed)	28898252
rs4607517	chr7	Type 2 diabetes	6e-06	rs4607517	None	0.1759	6,353 South Asian ancestry cases, 7,179 South Asian ancestry controls, 3,871 European ancestry cases, 16,427 European ancestry controls, 34,840 cases, 114,981 controls	7p13	intergenic	Affymetrix, Illumina [NR] (imputed)	28869590
rs4607517	chr7	Fasting blood glucose	1e-50	rs4607517	None	0.156284	50,900 European ancestry non-diabetic individuals, 9,664 African American non-diabetic individuals	7p13	GCK	Illumina [197481]	25631608
rs4607517	chr7	Fasting blood glucose (BMI interaction)	8e-56	rs4607517	None	0.1661	Up to 58,074 European ancestry individuals	7p13	GCK	Affymetrix, Illumina [~ 2400000] (imputed)	22581228
rs4607517	chr7	Fasting blood glucose	6e-52	rs4607517	None	0.1665	Up to 58,074 European ancestry individuals	7p13	GCK	Affymetrix, Illumina [~ 2400000] (imputed)	22581228
rs4607517	chr7	Fasting plasma glucose	1e-07	rs4607517	None	0.19	2,349 European ancestry individuals, 664 Chinese ancestry individuals, 1,366 African American individuals, 1,171 Hispanic individuals	7p13	GCKR	Affymetrix [NR] (imputed)	22508271
rs4607517	chr7	Homeostasis model assessment of beta-cell function	2e-16	rs4607517	None	0.16	36,466 European ancestry individuals	7p13	GCK	Affymetrix, Illumina [~ 2500000] (imputed)	20081858
rs4607517	chr7	Fasting blood glucose	7e-92	rs4607517	None	0.16	46,186 European ancestry individuals	7p13	GCK	Affymetrix, Illumina [~ 2500000] (imputed)	20081858
rs4607517	chr7	Fasting plasma glucose	1e-25	rs4607517	None	0.18	35,812 European ancestry individuals	7p13	GCK	Affymetrix, Illumina, Perlegen [up to 2557249] (imputed)	19060907
rs4841132	chr8	Red blood cell count	7e-14	rs4841132	None	0.923831	727,624 African American or Afro-Caribbean, African ancestry, European ancestry, East Asian ancestry, Hispanic or Latin American and South Asian ancestry individuals	8p23.1	None	Affymetrix, Illumina [24332387] (imputed)	32888493
rs4841132	chr8	Triglyceride levels	3e-06	rs4841132	None	None	9,980 African American individuals, 17,856 Hispanic/Latino individuals, 2,381 Asian ancestry individuals, 1,915 Native Hawaiian ancestry individuals, 604 Native American ancestry individuals, 360 individuals	8p23.1	None	Illumina [31978265] (imputed)	31217584
rs4841132	chr8	Total cholesterol levels	1e-08	rs4841132	None	None	10,137 African American individuals, 17,802 Hispanic/Latino individuals, 2,387 Asian ancestry individuals, 1,915 Native Hawaiian ancestry individuals, 604 Native American ancestry individuals, 340 individuals	8p23.1	None	Illumina [32003504] (imputed)	31217584
rs4841132	chr8	High density lipoprotein cholesterol levels	8e-21	rs4841132	None	None	10,085 African American individuals, 17,751 Hispanic/Latino individuals, 2,378 Asian ancestry individuals, 1,912 Native Hawaiian ancestry individuals, 604 Native American ancestry individuals, 333 individuals	8p23.1	None	Illumina [31978362] (imputed)	31217584
rs4841132	chr8	Fasting blood insulin	1e-06	rs4841132	None	None	5,525 African American individuals, 12,687 Hispanic/Latino individuals, 1,547 Asian ancestry individuals, 1,397 Native Hawaiian ancestry individuals, 395 Native American ancestry individuals	8p23.1	None	Illumina [28840767] (imputed)	31217584
rs4841132	chr8	Alcohol use disorder (consumption score)	4e-08	rs4841132	None	0.101	200,680 European American individuals, 56,495 African American individuals, 14,112 Latino American individuals, 1,366 East Asian American individuals, 189 South Asian American individuals	8p23.1	PPP1R3B	Affymetrix [up to 12500000] (imputed)	30940813
rs4841132	chr8	Triglyceride levels x alcohol consumption (regular vs non-regular drinkers) interaction (2df)	5e-15	rs4841132	None	None	44,831 European ancestry regular drinkers, 3,976 African American regular drinkers, 1,288 Asian ancestry regular drinkers, 827 Hispanic regular drinkers, 11,674 European ancestry non-regular drinkers, 5,894 African American non-regular drinkers, 1,203 Asian ancestry non-regular drinkers, 1,701 Hispanic non-regular drinkers	8p23.1	LOC157273	Affymetrix, Illumina [NR] (imputed)	30698716
rs4841132	chr8	Triglyceride levels x alcohol consumption (regular vs non-regular drinkers) interaction (2df)	2e-06	rs4841132	None	None	44,831 European ancestry regular drinkers, 3,976 African American regular drinkers, 1,288 Asian ancestry regular drinkers, 827 Hispanic regular drinkers, 11,674 European ancestry non-regular drinkers, 5,894 African American non-regular drinkers, 1,203 Asian ancestry non-regular drinkers, 1,701 Hispanic non-regular drinkers	8p23.1	LOC157273	Affymetrix, Illumina [NR] (imputed)	30698716
rs4841132	chr8	Triglyceride levels x alcohol consumption (regular vs non-regular drinkers) interaction (2df)	1e-06	rs4841132	None	None	44,831 European ancestry regular drinkers, 3,976 African American regular drinkers, 1,288 Asian ancestry regular drinkers, 827 Hispanic regular drinkers, 11,674 European ancestry non-regular drinkers, 5,894 African American non-regular drinkers, 1,203 Asian ancestry non-regular drinkers, 1,701 Hispanic non-regular drinkers	8p23.1	LOC157273	Affymetrix, Illumina [NR] (imputed)	30698716
rs4841132	chr8	Triglyceride levels x alcohol consumption (drinkers vs non-drinkers) interaction (2df)	6e-06	rs4841132	None	None	56,505 European ancestry current drinkers, 9,870 African American current drinkers, 2,491 Asian ancestry current drinkers, 2,528 Hispanic current drinkers, 33,388 European ancestry non-drinkers, 11,119 African American non-drinkers, 9,959 Asian ancestry non-drinkers, 1,466 Hispanic non-drinkers	8p23.1	LOC157273	Affymetrix, Illumina [NR] (imputed)	30698716
rs4841132	chr8	Triglyceride levels x alcohol consumption (drinkers vs non-drinkers) interaction (2df)	3e-07	rs4841132	None	None	56,505 European ancestry current drinkers, 9,870 African American current drinkers, 2,491 Asian ancestry current drinkers, 2,528 Hispanic current drinkers, 33,388 European ancestry non-drinkers, 11,119 African American non-drinkers, 9,959 Asian ancestry non-drinkers, 1,466 Hispanic non-drinkers	8p23.1	LOC157273	Affymetrix, Illumina [NR] (imputed)	30698716
rs4841132	chr8	Triglyceride levels x alcohol consumption (drinkers vs non-drinkers) interaction (2df)	2e-15	rs4841132	None	None	56,505 European ancestry current drinkers, 9,870 African American current drinkers, 2,491 Asian ancestry current drinkers, 2,528 Hispanic current drinkers, 33,388 European ancestry non-drinkers, 11,119 African American non-drinkers, 9,959 Asian ancestry non-drinkers, 1,466 Hispanic non-drinkers	8p23.1	LOC157273	Affymetrix, Illumina [NR] (imputed)	30698716
rs4841132	chr8	Triglyceride levels in current drinkers	2e-07	rs4841132	None	None	56,505 European ancestry individuals, 9,870 African American individuals, 2,491 Asian ancestry individuals, 2,528 Hispanic individuals	8p23.1	LOC157273	Affymetrix, Illumina [NR] (imputed)	30698716
rs4841132	chr8	Triglyceride levels in current drinkers	2e-06	rs4841132	None	None	56,505 European ancestry individuals, 9,870 African American individuals, 2,491 Asian ancestry individuals, 2,528 Hispanic individuals	8p23.1	LOC157273	Affymetrix, Illumina [NR] (imputed)	30698716
rs4841132	chr8	Triglyceride levels in current drinkers	1e-14	rs4841132	None	None	56,505 European ancestry individuals, 9,870 African American individuals, 2,491 Asian ancestry individuals, 2,528 Hispanic individuals	8p23.1	LOC157273	Affymetrix, Illumina [NR] (imputed)	30698716
rs4841132	chr8	Triglyceride levels	7e-06	rs4841132	None	None	89,893 European ancestry individuals, 20,989 African American individuals, 12,450 Asian ancestry individuals, 3,994 HIspanic individuals	8p23.1	LOC157273	Affymetrix, Illumina [NR] (imputed)	30698716
rs4841132	chr8	Triglyceride levels	4e-11	rs4841132	None	None	89,893 European ancestry individuals, 20,989 African American individuals, 12,450 Asian ancestry individuals, 3,994 HIspanic individuals	8p23.1	LOC157273	Affymetrix, Illumina [NR] (imputed)	30698716
rs4841132	chr8	LDL cholesterol levels x alcohol consumption (regular vs non-regular drinkers) interaction (2df)	7e-42	rs4841132	None	None	44,831 European ancestry regular drinkers, 3,976 African American regular drinkers, 1,288 Asian ancestry regular drinkers, 827 Hispanic regular drinkers, 11,674 European ancestry non-regular drinkers, 5,894 African American non-regular drinkers, 1,203 Asian ancestry non-regular drinkers, 1,701 Hispanic non-regular drinkers	8p23.1	LOC157273	Affymetrix, Illumina [NR] (imputed)	30698716
rs4841132	chr8	LDL cholesterol levels x alcohol consumption (regular vs non-regular drinkers) interaction (2df)	2e-07	rs4841132	None	None	44,831 European ancestry regular drinkers, 3,976 African American regular drinkers, 1,288 Asian ancestry regular drinkers, 827 Hispanic regular drinkers, 11,674 European ancestry non-regular drinkers, 5,894 African American non-regular drinkers, 1,203 Asian ancestry non-regular drinkers, 1,701 Hispanic non-regular drinkers	8p23.1	LOC157273	Affymetrix, Illumina [NR] (imputed)	30698716
rs4841132	chr8	LDL cholesterol levels x alcohol consumption (regular vs non-regular drinkers) interaction (2df)	2e-32	rs4841132	None	None	44,831 European ancestry regular drinkers, 3,976 African American regular drinkers, 1,288 Asian ancestry regular drinkers, 827 Hispanic regular drinkers, 11,674 European ancestry non-regular drinkers, 5,894 African American non-regular drinkers, 1,203 Asian ancestry non-regular drinkers, 1,701 Hispanic non-regular drinkers	8p23.1	LOC157273	Affymetrix, Illumina [NR] (imputed)	30698716
rs4841132	chr8	LDL cholesterol levels x alcohol consumption (drinkers vs non-drinkers) interaction (2df)	7e-36	rs4841132	None	None	56,505 European ancestry current drinkers, 9,870 African American current drinkers, 2,491 Asian ancestry current drinkers, 2,528 Hispanic current drinkers, 33,388 European ancestry non-drinkers, 11,119 African American non-drinkers, 9,959 Asian ancestry non-drinkers, 1,466 Hispanic non-drinkers	8p23.1	LOC157273	Affymetrix, Illumina [NR] (imputed)	30698716
rs4841132	chr8	LDL cholesterol levels x alcohol consumption (drinkers vs non-drinkers) interaction (2df)	2e-08	rs4841132	None	None	56,505 European ancestry current drinkers, 9,870 African American current drinkers, 2,491 Asian ancestry current drinkers, 2,528 Hispanic current drinkers, 33,388 European ancestry non-drinkers, 11,119 African American non-drinkers, 9,959 Asian ancestry non-drinkers, 1,466 Hispanic non-drinkers	8p23.1	LOC157273	Affymetrix, Illumina [NR] (imputed)	30698716
rs4841132	chr8	LDL cholesterol levels x alcohol consumption (drinkers vs non-drinkers) interaction (2df)	2e-07	rs4841132	None	None	56,505 European ancestry current drinkers, 9,870 African American current drinkers, 2,491 Asian ancestry current drinkers, 2,528 Hispanic current drinkers, 33,388 European ancestry non-drinkers, 11,119 African American non-drinkers, 9,959 Asian ancestry non-drinkers, 1,466 Hispanic non-drinkers	8p23.1	LOC157273	Affymetrix, Illumina [NR] (imputed)	30698716
rs4841132	chr8	LDL cholesterol levels x alcohol consumption (drinkers vs non-drinkers) interaction (2df)	2e-48	rs4841132	None	None	56,505 European ancestry current drinkers, 9,870 African American current drinkers, 2,491 Asian ancestry current drinkers, 2,528 Hispanic current drinkers, 33,388 European ancestry non-drinkers, 11,119 African American non-drinkers, 9,959 Asian ancestry non-drinkers, 1,466 Hispanic non-drinkers	8p23.1	LOC157273	Affymetrix, Illumina [NR] (imputed)	30698716
rs4841132	chr8	LDL cholesterol levels in current drinkers	7e-26	rs4841132	None	None	56,505 European ancestry individuals, 9,870 African American individuals, 2,491 Asian ancestry individuals, 2,528 Hispanic individuals	8p23.1	LOC157273	Affymetrix, Illumina [NR] (imputed)	30698716
rs4841132	chr8	LDL cholesterol levels in current drinkers	5e-06	rs4841132	None	None	56,505 European ancestry individuals, 9,870 African American individuals, 2,491 Asian ancestry individuals, 2,528 Hispanic individuals	8p23.1	LOC157273	Affymetrix, Illumina [NR] (imputed)	30698716
rs4841132	chr8	LDL cholesterol levels in current drinkers	2e-19	rs4841132	None	None	56,505 European ancestry individuals, 9,870 African American individuals, 2,491 Asian ancestry individuals, 2,528 Hispanic individuals	8p23.1	LOC157273	Affymetrix, Illumina [NR] (imputed)	30698716
rs4841132	chr8	LDL cholesterol levels	7e-06	rs4841132	None	None	89,893 European ancestry individuals, 20,989 African American individuals, 12,450 Asian ancestry individuals, 3,994 HIspanic individuals	8p23.1	LOC157273	Affymetrix, Illumina [NR] (imputed)	30698716
rs4841132	chr8	LDL cholesterol levels	3e-08	rs4841132	None	None	89,893 European ancestry individuals, 20,989 African American individuals, 12,450 Asian ancestry individuals, 3,994 HIspanic individuals	8p23.1	LOC157273	Affymetrix, Illumina [NR] (imputed)	30698716
rs4841132	chr8	LDL cholesterol levels	1e-14	rs4841132	None	None	89,893 European ancestry individuals, 20,989 African American individuals, 12,450 Asian ancestry individuals, 3,994 HIspanic individuals	8p23.1	LOC157273	Affymetrix, Illumina [NR] (imputed)	30698716
rs4841132	chr8	HDL cholesterol levels x alcohol consumption (regular vs non-regular drinkers) interaction (2df)	9e-71	rs4841132	None	None	44,831 European ancestry regular drinkers, 3,976 African American regular drinkers, 1,288 Asian ancestry regular drinkers, 827 Hispanic regular drinkers, 11,674 European ancestry non-regular drinkers, 5,894 African American non-regular drinkers, 1,203 Asian ancestry non-regular drinkers, 1,701 Hispanic non-regular drinkers	8p23.1	LOC157273	Affymetrix, Illumina [NR] (imputed)	30698716
rs4841132	chr8	HDL cholesterol levels x alcohol consumption (regular vs non-regular drinkers) interaction (2df)	9e-23	rs4841132	None	None	44,831 European ancestry regular drinkers, 3,976 African American regular drinkers, 1,288 Asian ancestry regular drinkers, 827 Hispanic regular drinkers, 11,674 European ancestry non-regular drinkers, 5,894 African American non-regular drinkers, 1,203 Asian ancestry non-regular drinkers, 1,701 Hispanic non-regular drinkers	8p23.1	LOC157273	Affymetrix, Illumina [NR] (imputed)	30698716
rs4841132	chr8	HDL cholesterol levels x alcohol consumption (regular vs non-regular drinkers) interaction (2df)	8e-106	rs4841132	None	None	44,831 European ancestry regular drinkers, 3,976 African American regular drinkers, 1,288 Asian ancestry regular drinkers, 827 Hispanic regular drinkers, 11,674 European ancestry non-regular drinkers, 5,894 African American non-regular drinkers, 1,203 Asian ancestry non-regular drinkers, 1,701 Hispanic non-regular drinkers	8p23.1	LOC157273	Affymetrix, Illumina [NR] (imputed)	30698716
rs4841132	chr8	HDL cholesterol levels x alcohol consumption (regular vs non-regular drinkers) interaction (2df)	6e-09	rs4841132	None	None	44,831 European ancestry regular drinkers, 3,976 African American regular drinkers, 1,288 Asian ancestry regular drinkers, 827 Hispanic regular drinkers, 11,674 European ancestry non-regular drinkers, 5,894 African American non-regular drinkers, 1,203 Asian ancestry non-regular drinkers, 1,701 Hispanic non-regular drinkers	8p23.1	LOC157273	Affymetrix, Illumina [NR] (imputed)	30698716
rs4841132	chr8	HDL cholesterol levels x alcohol consumption (regular vs non-regular drinkers) interaction (2df)	2e-12	rs4841132	None	None	44,831 European ancestry regular drinkers, 3,976 African American regular drinkers, 1,288 Asian ancestry regular drinkers, 827 Hispanic regular drinkers, 11,674 European ancestry non-regular drinkers, 5,894 African American non-regular drinkers, 1,203 Asian ancestry non-regular drinkers, 1,701 Hispanic non-regular drinkers	8p23.1	LOC157273	Affymetrix, Illumina [NR] (imputed)	30698716
rs4841132	chr8	HDL cholesterol levels x alcohol consumption (drinkers vs non-drinkers) interaction (2df)	7e-79	rs4841132	None	None	56,505 European ancestry current drinkers, 9,870 African American current drinkers, 2,491 Asian ancestry current drinkers, 2,528 Hispanic current drinkers, 33,388 European ancestry non-drinkers, 11,119 African American non-drinkers, 9,959 Asian ancestry non-drinkers, 1,466 Hispanic non-drinkers	8p23.1	LOC157273	Affymetrix, Illumina [NR] (imputed)	30698716
rs4841132	chr8	HDL cholesterol levels x alcohol consumption (drinkers vs non-drinkers) interaction (2df)	7e-23	rs4841132	None	None	56,505 European ancestry current drinkers, 9,870 African American current drinkers, 2,491 Asian ancestry current drinkers, 2,528 Hispanic current drinkers, 33,388 European ancestry non-drinkers, 11,119 African American non-drinkers, 9,959 Asian ancestry non-drinkers, 1,466 Hispanic non-drinkers	8p23.1	LOC157273	Affymetrix, Illumina [NR] (imputed)	30698716
rs4841132	chr8	HDL cholesterol levels x alcohol consumption (drinkers vs non-drinkers) interaction (2df)	6e-114	rs4841132	None	None	56,505 European ancestry current drinkers, 9,870 African American current drinkers, 2,491 Asian ancestry current drinkers, 2,528 Hispanic current drinkers, 33,388 European ancestry non-drinkers, 11,119 African American non-drinkers, 9,959 Asian ancestry non-drinkers, 1,466 Hispanic non-drinkers	8p23.1	LOC157273	Affymetrix, Illumina [NR] (imputed)	30698716
rs4841132	chr8	HDL cholesterol levels x alcohol consumption (drinkers vs non-drinkers) interaction (2df)	4e-08	rs4841132	None	None	56,505 European ancestry current drinkers, 9,870 African American current drinkers, 2,491 Asian ancestry current drinkers, 2,528 Hispanic current drinkers, 33,388 European ancestry non-drinkers, 11,119 African American non-drinkers, 9,959 Asian ancestry non-drinkers, 1,466 Hispanic non-drinkers	8p23.1	LOC157273	Affymetrix, Illumina [NR] (imputed)	30698716
rs4841132	chr8	HDL cholesterol levels x alcohol consumption (drinkers vs non-drinkers) interaction (2df)	3e-14	rs4841132	None	None	56,505 European ancestry current drinkers, 9,870 African American current drinkers, 2,491 Asian ancestry current drinkers, 2,528 Hispanic current drinkers, 33,388 European ancestry non-drinkers, 11,119 African American non-drinkers, 9,959 Asian ancestry non-drinkers, 1,466 Hispanic non-drinkers	8p23.1	LOC157273	Affymetrix, Illumina [NR] (imputed)	30698716
rs4841132	chr8	HDL cholesterol levels in current drinkers	7e-48	rs4841132	None	None	56,505 European ancestry individuals, 9,870 African American individuals, 2,491 Asian ancestry individuals, 2,528 Hispanic individuals	8p23.1	LOC157273	Affymetrix, Illumina [NR] (imputed)	30698716
rs4841132	chr8	HDL cholesterol levels in current drinkers	6e-08	rs4841132	None	None	56,505 European ancestry individuals, 9,870 African American individuals, 2,491 Asian ancestry individuals, 2,528 Hispanic individuals	8p23.1	LOC157273	Affymetrix, Illumina [NR] (imputed)	30698716
rs4841132	chr8	HDL cholesterol levels in current drinkers	4e-74	rs4841132	None	None	56,505 European ancestry individuals, 9,870 African American individuals, 2,491 Asian ancestry individuals, 2,528 Hispanic individuals	8p23.1	LOC157273	Affymetrix, Illumina [NR] (imputed)	30698716
rs4841132	chr8	HDL cholesterol levels in current drinkers	3e-13	rs4841132	None	None	56,505 European ancestry individuals, 9,870 African American individuals, 2,491 Asian ancestry individuals, 2,528 Hispanic individuals	8p23.1	LOC157273	Affymetrix, Illumina [NR] (imputed)	30698716
rs4841132	chr8	HDL cholesterol levels in current drinkers	2e-14	rs4841132	None	None	56,505 European ancestry individuals, 9,870 African American individuals, 2,491 Asian ancestry individuals, 2,528 Hispanic individuals	8p23.1	LOC157273	Affymetrix, Illumina [NR] (imputed)	30698716
rs4841132	chr8	HDL cholesterol levels	9e-07	rs4841132	None	None	89,893 European ancestry individuals, 20,989 African American individuals, 12,450 Asian ancestry individuals, 3,994 HIspanic individuals	8p23.1	LOC157273	Affymetrix, Illumina [NR] (imputed)	30698716
rs4841132	chr8	HDL cholesterol levels	5e-52	rs4841132	None	None	89,893 European ancestry individuals, 20,989 African American individuals, 12,450 Asian ancestry individuals, 3,994 HIspanic individuals	8p23.1	LOC157273	Affymetrix, Illumina [NR] (imputed)	30698716
rs4841132	chr8	HDL cholesterol levels	3e-07	rs4841132	None	None	89,893 European ancestry individuals, 20,989 African American individuals, 12,450 Asian ancestry individuals, 3,994 HIspanic individuals	8p23.1	LOC157273	Affymetrix, Illumina [NR] (imputed)	30698716
rs4841132	chr8	HDL cholesterol levels	2e-31	rs4841132	None	None	89,893 European ancestry individuals, 20,989 African American individuals, 12,450 Asian ancestry individuals, 3,994 HIspanic individuals	8p23.1	LOC157273	Affymetrix, Illumina [NR] (imputed)	30698716
rs4841132	chr8	HDL cholesterol levels	1e-11	rs4841132	None	None	89,893 European ancestry individuals, 20,989 African American individuals, 12,450 Asian ancestry individuals, 3,994 HIspanic individuals	8p23.1	LOC157273	Affymetrix, Illumina [NR] (imputed)	30698716
rs4841132	chr8	HDL cholesterol x physical activity interaction (2df test)	2e-63	rs4841132	None	0.1012	7,395 African American inactive individuals, 13,092 African American active individuals, 2,753 Asian ancestry inactive individuals, 3,650 Asian ancestry active individuals, 22,963 European ancestry inactive individuals, 61,939 European ancestry active individuals, 2,829 Hispanic or Latin American inactive individuals, 6,358 Hispanic or Latin American active individuals	8p23.1	None	Affymetrix, Illumina [at least 2500000] (imputed)	30670697
rs4841132	chr8	C-reactive protein levels	2e-25	rs4841132	None	0.09	up to 92,771 European ancestry males, up to 113,387 European ancestry females	8p23.1	PPP1R3B	Affymetrix, Illumina, Perlegen [2437193] (imputed)	30388399
rs4841132	chr8	HDL cholesterol	1e-105	rs4841132	None	0.1054	215,551 European ancestry individuals, 57,332 African American individuals, 24,743 Hispanic individuals	8p23.1	RP11-115J16.1	Affymetrix [up to 31400000] (imputed)	30275531
rs4841132	chr8	Triglycerides	2e-07	rs4841132	None	None	76,627 European ancestry individuals, 7,795 Hispanic individuals, 6,855 East Asian ancestry individuals, 2,958 African American individuals, 439 South Asian ancestry individuals	8p23.1	None	Affymetrix [at least 7091467] (imputed)	29507422
rs4841132	chr8	Total cholesterol levels	2e-25	rs4841132	None	None	76,627 European ancestry individuals, 7,795 Hispanic individuals, 6,855 East Asian ancestry individuals, 2,958 African American individuals, 439 South Asian ancestry individuals	8p23.1	None	Affymetrix [at least 7091467] (imputed)	29507422
rs4841132	chr8	Total cholesterol levels	3e-08	rs4841132	None	0.161	76,627 European ancestry individuals, 7,795 Hispanic individuals, 6,855 East Asian ancestry individuals, 2,958 African American individuals, 439 South Asian ancestry individuals	8p23.1	None	Affymetrix [at least 7091467] (imputed)	29507422
rs4841132	chr8	Total cholesterol levels	2e-18	rs4841132	None	0.087	76,627 European ancestry individuals, 7,795 Hispanic individuals, 6,855 East Asian ancestry individuals, 2,958 African American individuals, 439 South Asian ancestry individuals	8p23.1	None	Affymetrix [at least 7091467] (imputed)	29507422
rs4841132	chr8	Low density lipoprotein cholesterol levels	1e-17	rs4841132	None	None	76,627 European ancestry individuals, 7,795 Hispanic individuals, 6,855 East Asian ancestry individuals, 2,958 African American individuals, 439 South Asian ancestry individuals	8p23.1	None	Affymetrix [at least 7091467] (imputed)	29507422
rs4841132	chr8	Low density lipoprotein cholesterol levels	7e-07	rs4841132	None	0.161	76,627 European ancestry individuals, 7,795 Hispanic individuals, 6,855 East Asian ancestry individuals, 2,958 African American individuals, 439 South Asian ancestry individuals	8p23.1	None	Affymetrix [at least 7091467] (imputed)	29507422
rs4841132	chr8	Low density lipoprotein cholesterol levels	1e-12	rs4841132	None	0.087	76,627 European ancestry individuals, 7,795 Hispanic individuals, 6,855 East Asian ancestry individuals, 2,958 African American individuals, 439 South Asian ancestry individuals	8p23.1	None	Affymetrix [at least 7091467] (imputed)	29507422
rs4841132	chr8	High density lipoprotein cholesterol levels	4e-47	rs4841132	None	None	76,627 European ancestry individuals, 7,795 Hispanic individuals, 6,855 East Asian ancestry individuals, 2,958 African American individuals, 439 South Asian ancestry individuals	8p23.1	None	Affymetrix [at least 7091467] (imputed)	29507422
rs4841132	chr8	High density lipoprotein cholesterol levels	4e-10	rs4841132	None	0.161	76,627 European ancestry individuals, 7,795 Hispanic individuals, 6,855 East Asian ancestry individuals, 2,958 African American individuals, 439 South Asian ancestry individuals	8p23.1	None	Affymetrix [at least 7091467] (imputed)	29507422
rs4841132	chr8	High density lipoprotein cholesterol levels	2e-35	rs4841132	None	0.087	76,627 European ancestry individuals, 7,795 Hispanic individuals, 6,855 East Asian ancestry individuals, 2,958 African American individuals, 439 South Asian ancestry individuals	8p23.1	None	Affymetrix [at least 7091467] (imputed)	29507422
rs4841132	chr8	Iron status biomarkers (total iron binding capacity)	7e-08	rs4841132	None	None	12,586 Hispanic/Latino individuals	8p23.1	PPP1R3B	Illumina [27700000] (imputed)	28334935
rs4841132	chr8	Iron status biomarkers (total iron binding capacity)	7e-08	rs4841132	None	None	12,586 Hispanic/Latino individuals	8p23.1	LOC157273, PP1R3B	Illumina [27700000] (imputed)	28334935
rs4841132	chr8	HDL cholesterol	1e-08	rs4841132	None	0.0925	19,223 British ancestry individuals from 6863 families.	8p23.1	RP-11-115 J16.1	Illumina [24111857] (imputed)	28270201
rs4841132	chr8	Neutrophil percentage of white cells	3e-11	rs4841132	None	0.9084	171,542 European ancestry individuals	8p23.1	RP11-115J16.1	Affymetrix [~ 2500000] (imputed)	27863252
rs4841132	chr8	HDL cholesterol	4e-20	rs4841132	None	0.9	up to 62,166 European ancestry individuals	8p23.1	PPP1R3B	Affymetrix, Illumina, Perlegen [up to 9657952] (imputed)	25961943
rs4841132	chr8	Fasting blood insulin	1e-07	rs4841132	None	0.0888875	35,380 European ancestry non-diabetic individuals, 12,738 African American non-diabetic individuals	8p23.1	PPP1R3B	Illumina [197481]	25631608
rs4841132	chr8	Fasting blood glucose	8e-12	rs4841132	None	0.0901824	50,900 European ancestry non-diabetic individuals, 9,664 African American non-diabetic individuals	8p23.1	PPP1R3B	Illumina [197481]	25631608
rs4841132	chr8	Glycemic traits (pregnancy)	5e-15	rs4841132	None	0.91	1,367 European ancestry individuals, 817 Hispanic individuals, 1,075 Afro-Caribbean individuals, 1,178 Thai ancestry individuals	8p23.1	PPP1R3B	Illumina [up to 945994] (imputed)	23903356
rs4841132	chr8	Glycemic traits (pregnancy)	3e-13	rs4841132	None	0.91	1,367 European ancestry individuals, 817 Hispanic individuals, 1,075 Afro-Caribbean individuals, 1,178 Thai ancestry individuals	8p23.1	PPP1R3B	Illumina [up to 945994] (imputed)	23903356
rs4841132	chr8	Metabolite levels	2e-09	rs4841132	None	0.15	6,608 European ancestry individuals	8p23.1	PPP1R3B, TNKS	Illumina [~ 2000000] (imputed)	22916037
rs4841132	chr8	Fasting blood insulin (BMI interaction)	2e-10	rs4841132	None	0.0937	Up to 51,750 European ancestry individuals	8p23.1	PPP1R3B	Affymetrix, Illumina [~ 2400000] (imputed)	22581228
rs4841132	chr8	Fasting blood insulin	6e-15	rs4841132	None	0.1162	Up to 51,750 European ancestry individuals	8p23.1	PPP1R3B	Affymetrix, Illumina [~ 2400000] (imputed)	22581228
rs4841132	chr8	Fasting blood glucose (BMI interaction)	8e-09	rs4841132	None	0.0936	Up to 58,074 European ancestry individuals	8p23.1	PPP1R3B	Affymetrix, Illumina [~ 2400000] (imputed)	22581228
rs4841132	chr8	Fasting blood glucose	1e-13	rs4841132	None	0.1045	Up to 58,074 European ancestry individuals	8p23.1	PPP1R3B	Affymetrix, Illumina [~ 2400000] (imputed)	22581228
rs3802177	chr8	Type 2 diabetes	8e-14	rs3802177	None	0.31	2,277 African American cases, 3,098 East Asian ancestry cases, 3,704 European ancestry cases, 6,215 Hispanic/Latino cases, 2,939 South Asian ancestry cases, 2,283 African American controls, 2,921 East Asian ancestry controls, 3,514 European ancestry controls, 5,939 Hispanic/Latino controls, 3,022 South Asian ancestry controls	8q24.11	SLC30A8	Affymetrix, Illumina [up to 35256845] (imputed)	31118516
rs3802177	chr8	Medication use (drugs used in diabetes)	4e-14	rs3802177	None	0.309928	15,272 European ancestry cases, 29,0641 European ancestry controls	8q24.11	SLC30A8	Affymetrix [7288503] (imputed)	31015401
rs3802177	chr8	Type 2 diabetes	2e-24	rs3802177	None	None	approximately 459,000 European ancestry individuals	8q24.11		NR [~ 8900000] (imputed)	30595370
rs3802177	chr8	Type 2 diabetes	1e-55	rs3802177	None	0.6851	74,124 European ancestry cases, 824,006 European ancestry controls	8q24.11	SLC30A8	Affymetrix, Illumina [~ 27000000] (imputed)	30297969
rs3802177	chr8	Type 2 diabetes	2e-52	rs3802177	None	0.311281	61,714 European ancestry cases, 1,178 Pakistani ancestry cases, 593,952 European ancestry controls, 2,472 Pakistani ancestry controls	8q24.11	SLC30A8	NR [5035015] (imputed)	30054458
rs3802177	chr8	Body mass index	5e-10	rs3802177	None	0.29	up to 72,390 Japanese ancestry women, up to 85,894 Japanese ancestry men	8q24.11	SLC30A8	Illumina [6108953] (imputed)	28892062
rs3802177	chr8	Type 2 diabetes	1e-06	rs3802177	None	None	4,040 British ancestry cases, 113,735 British ancestry controls	8q24.11	SLC30A8	NR [9288881] (imputed)	26961502
rs3802177	chr8	Fasting plasma glucose	5e-12	rs3802177	None	None	24,740 East Asian ancestry individuals	8q24.11	SLC30A8	Affymetrix, Illumina [up to 2315813] (imputed)	25187374
rs3802177	chr8	Type 2 diabetes	2e-18	rs3802177	None	0.7	12,171 European ancestry cases, 56,862 European ancestry controls, 6,952 East Asian ancestry cases, 11,865 East Asian ancestry controls, 5,561 South Asian ancestry cases, 14,458 South Asian ancestry controls, 1,804 Mexican ancestry cases, 779 Mexican ancestry controls	8q24.11	SLC30A8	Affymetrix, Illumina [2500000] (imputed)	24509480
rs3802177	chr8	Type 2 diabetes	7e-11	rs3802177	None	None	6,377 European ancestry male cases, 5,794 European ancestry female cases, 22,243 European ancestry male controls, 34,619 European ancestry female controls	8q24.11	SLC30A8	Affymetrix, Illumina [up to 2500000] (imputed)	22885922
rs3802177	chr8	Type 2 diabetes	1e-16	rs3802177	None	None	6,377 European ancestry male cases, 5,794 European ancestry female cases, 22,243 European ancestry male controls, 34,619 European ancestry female controls	8q24.11	SLC30A8	Affymetrix, Illumina [up to 2500000] (imputed)	22885922
rs3802177	chr8	Type 2 diabetes	1e-21	rs3802177	None	0.662967	6,377 European ancestry male cases, 5,794 European ancestry female cases, 22,243 European ancestry male controls, 34,619 European ancestry female controls	8q24.11	SLC30A8	Affymetrix, Illumina [up to 2500000] (imputed)	22885922
rs3802177	chr8	Type 2 diabetes	4e-08	rs3802177	None	0.68	2,112 lean type 2 diabetes cases, 4,123 obese type 2 diabetes cases, 54,412 controls	8q24.11	SLC30A8	NR [NR]	22693455
rs3802177	chr8	Type 2 diabetes	1e-08	rs3802177	None		8,130 European ancestry cases, 38,987 European ancestry controls	8q24.11	SLC30A8	Affymetrix, Illumina [2426886] (imputed)	20581827
rs7041847	chr9	Type 2 diabetes	3e-08	rs7041847	None	0.4672	6,353 South Asian ancestry cases, 7,179 South Asian ancestry controls, 3,871 European ancestry cases, 16,427 European ancestry controls, 34,840 cases, 114,981 controls	9p24.2	GLIS3	Affymetrix, Illumina [NR] (imputed)	28869590
rs7041847	chr9	Type 2 diabetes	5e-06	rs7041847	None	0.5	12,171 European ancestry cases, 56,862 European ancestry controls, 6,952 East Asian ancestry cases, 11,865 East Asian ancestry controls, 5,561 South Asian ancestry cases, 14,458 South Asian ancestry controls, 1,804 Mexican ancestry cases, 779 Mexican ancestry controls	9p24.2	GLIS3	Affymetrix, Illumina [2500000] (imputed)	24509480
rs7041847	chr9	Type 2 diabetes	2e-14	rs7041847	None	0.41	5,999 East Asian ancestry cases, 9,001 East Asian ancestry controls, 794 Malay ancestry cases, 1,240 Malay ancestry controls, 159 Filipino ancestry cases, 1,624 Filipino ancestry controls	9p24.2	GLIS3	Affymetrix, Illumina [2626356] (imputed)	22158537
rs10811661	chr9	Type 2 diabetes	8e-112	rs10811661	None	0.1717	148,726 European ancestry cases, 965,732 European ancestry controls	9p21.3	None	Affymetrix, Illumina [1198787] (imputed)	32541925
rs10811661	chr9	Type 2 diabetes	1e-205	rs10811661	None	0.2442	148,726 European ancestry cases, 24,646 African American cases, 8,616 Hispanic cases, 46,511 Asian ancestry cases, 965,732 European ancestry controls, 31,446 African American controls, 11,829 Hispanic controls, 169,776 Asian ancestry controls	9p21.3	None	Affymetrix, Illumina [at least 945603] (imputed)	32541925
rs10811661	chr9	Type 2 diabetes	4e-58	rs10811661	None	0.173605	61,714 European ancestry cases, 1,178 Pakistani ancestry cases, 593,952 European ancestry controls, 2,472 Pakistani ancestry controls	9p21.3	CDKN2B-AS1	NR [5035015] (imputed)	30054458
rs10811661	chr9	Body mass index	5e-13	rs10811661	None	0.16	up to 72,390 Japanese ancestry women, up to 85,894 Japanese ancestry men	9p21.3	CDKN2B-AS1, DMRTA1	Illumina [6108953] (imputed)	28892062
rs10811661	chr9	Type 2 diabetes	2e-68	rs10811661	None	0.168	6,353 South Asian ancestry cases, 7,179 South Asian ancestry controls, 3,871 European ancestry cases, 16,427 European ancestry controls, 34,840 cases, 114,981 controls	9p21.3	CDKN2A/2B	Affymetrix, Illumina [NR] (imputed)	28869590
rs10811661	chr9	Type 2 diabetes	1e-30	rs10811661	None	0.168	6,353 South Asian ancestry cases, 7,179 South Asian ancestry controls, 3,871 European ancestry cases, 16,427 European ancestry controls, 34,840 cases, 114,981 controls	9p21.3	CDKN2A/2B	Affymetrix, Illumina [NR] (imputed)	28869590
rs10811661	chr9	Type 2 diabetes	9e-11	rs10811661	None	0.1319	6,353 South Asian ancestry cases, 7,179 South Asian ancestry controls, 3,871 European ancestry cases, 16,427 European ancestry controls, 34,840 cases, 114,981 controls	9p21.3	CDKN2A/2B	Affymetrix, Illumina [NR] (imputed)	28869590
rs10811661	chr9	Type 2 diabetes	2e-10	rs10811661	None	0.815	746 African American cases, 2,825 African American controls, 743 East Asian ancestry cases, 3,992 East Asian ancestry controls, 7,111 European ancestry cases, 49,688 European ancestry controls, 1,147 Latino cases, 5,352 Latino controls	9p21.3	CDKN2A, CDKN2B	NR [at least 8497425] (imputed)	27189021
rs10811661	chr9	Type 2 diabetes	1e-09	rs10811661	None	None	4,040 British ancestry cases, 113,735 British ancestry controls	9p21.3	CDKN2A, CDKN2B	NR [9288881] (imputed)	26961502
rs10811661	chr9	Fasting blood glucose	2e-07	rs10811661	None	0.184825	50,900 European ancestry non-diabetic individuals, 9,664 African American non-diabetic individuals	9p21.3	CDKN2B	Illumina [197481]	25631608
rs10811661	chr9	Fasting plasma glucose	9e-12	rs10811661	None	None	24,740 East Asian ancestry individuals	9p21.3	CDKN2A, CDKN2B	Affymetrix, Illumina [up to 2315813] (imputed)	25187374
rs10811661	chr9	Type 2 diabetes	1e-27	rs10811661	None	0.82	12,171 European ancestry cases, 56,862 European ancestry controls, 6,952 East Asian ancestry cases, 11,865 East Asian ancestry controls, 5,561 South Asian ancestry cases, 14,458 South Asian ancestry controls, 1,804 Mexican ancestry cases, 779 Mexican ancestry controls	9p21.3	CDKN2A, CDKN2B	Affymetrix, Illumina [2500000] (imputed)	24509480
rs10811661	chr9	Type 2 diabetes	1e-18	rs10811661	None	0.55	5,976 Japanese ancestry cases, 20,829 Japanese ancestry controls	9p21.3	CDKN2A, CDKN2B	Illumina [6209637] (imputed)	23945395
rs10811661	chr9	Type 2 diabetes	4e-27	rs10811661	None	0.824989	6,377 European ancestry male cases, 5,794 European ancestry female cases, 22,243 European ancestry male controls, 34,619 European ancestry female controls	9p21.3	CDKN2A/B	Affymetrix, Illumina [up to 2500000] (imputed)	22885922
rs10811661	chr9	Fasting blood glucose (BMI interaction)	7e-06	rs10811661	None	0.8215	Up to 58,074 European ancestry individuals	9p21.3	CDKN2B	Affymetrix, Illumina [~ 2400000] (imputed)	22581228
rs10811661	chr9	Fasting blood glucose	1e-06	rs10811661	None	0.821	Up to 58,074 European ancestry individuals	9p21.3	CDKN2B	Affymetrix, Illumina [~ 2400000] (imputed)	22581228
rs10811661	chr9	Type 2 diabetes	7e-07	rs10811661	None	None	958 European ancestry obese cases, 955 European ancestry non-obese cases, 2,938 European ancestry controls	9p21.3	CDKN2B	Affymetrix [393453]	19056611
rs10811661	chr9	Type 2 diabetes	5e-06	rs10811661	None	0.83	1,924 European ancestry cases, 2,938 European ancestry controls	9p21.3	CDKN2A, CDKN2B	Affymetrix [393453]	17463249
rs10811661	chr9	Type 2 diabetes	8e-15	rs10811661	None	0.85	1,161 European ancestry cases, 1,174 European ancestry controls	9p21.3	CDKN2A, CDKN2B	Illumina [315635]	17463248
rs10811661	chr9	Type 2 diabetes	8e-15	rs10811661	None	0.83	1,464 European ancestry cases, 1,467 European ancestry controls	9p21.3	CDKN2A, CDKN2B	Affymetrix [386731]	17463246
rs11787792	chr9	Type 2 diabetes	2e-12	rs11787792	None	0.673	6,353 South Asian ancestry cases, 7,179 South Asian ancestry controls, 3,871 European ancestry cases, 16,427 European ancestry controls, 34,840 cases, 114,981 controls	9q34.3	GPSM1	Affymetrix, Illumina [NR] (imputed)	28869590
rs11787792	chr9	Type 2 diabetes	2e-10	rs11787792	None	0.874	5,976 Japanese ancestry cases, 20,829 Japanese ancestry controls	9q34.3	GPSM1	Illumina [6209637] (imputed)	23945395
rs5945326	chrX	Type 2 diabetes	2e-12	rs5945326	None	0.68	5,976 Japanese ancestry cases, 20,829 Japanese ancestry controls	Xq28	DUSP9	Illumina [6209637] (imputed)	23945395
rs5945326	chrX	Type 2 diabetes	7e-16	rs5945326	None	0.606	1,839 Han Chinese ancestry cases, 1,873 Han Chinese ancestry controls	Xq28	DUSP9	Illumina [2234194] (imputed)	22961080
rs5945326	chrX	Type 2 diabetes	3e-10	rs5945326	None		8,130 European ancestry cases, 38,987 European ancestry controls	Xq28	DUSP9	Affymetrix, Illumina [2426886] (imputed)	20581827

## Sheet: GENE2FUNC_FUMA
Category	GeneSet	N_genes	N_overlap	p	adjP	genes	link
GWAScatalog	Fasting blood glucose (BMI interaction)	37	16	1.45475e-36	2.46405e-33	PROX1:TCF7L2:CRY2:MADD:FADS1:MTNR1B:GCKR:G6PC2:ADCY5:SLC2A2:IGF2BP2:PCSK1:RREB1:GCK:SLC30A8:GLIS3
GWAScatalog	Fasting blood glucose	52	17	2.71521e-36	2.46405e-33	PROX1:TCF7L2:CRY2:MADD:FADS1:MTNR1B:GCKR:SPC25:G6PC2:ADCY5:SLC2A2:PCSK1:RREB1:CDKAL1:GCK:SLC30A8:GLIS3
GWAScatalog	Type 2 diabetes	494	24	3.37731e-30	2.04327e-27	PROX1-AS1:PROX1:TCF7L2:KCNQ1:KCNJ11:MTNR1B:OASL:HMG20A:FTO:CMIP:HNF1B:PEPD:GCKR:IRS1:PPARG:ADCY5:IGF2BP2:RREB1:CDKAL1:GCK:SLC30A8:GLIS3:PTPRD:GPSM1
GWAScatalog	Medication use (drugs used in diabetes)	49	14	5.64766e-29	2.56263e-26	PROX1-AS1:TCF7L2:KCNQ1:KCNJ11:HMG20A:FTO:HNF1B:GCKR:PPARG:ADCY5:IGF2BP2:RREB1:CDKAL1:SLC30A8
GWAScatalog	Hemoglobin A1c levels	47	11	7.92166e-22	2.87556e-19	TCF7L2:KCNQ1:FADS2:MTNR1B:HMG20A:G6PC2:SLC2A2:IGF2BP2:CDKAL1:GCK:SLC30A8
GWAScatalog	Homeostasis model assessment of beta-cell function	12	8	1.04084e-20	3.14854e-18	PROX1:FADS1:MTNR1B:G6PC2:ADCY5:SLC2A2:GCK:GLIS3
GWAScatalog	Blood sugar levels	26	9	8.65586e-20	2.24434e-17	KCNQ1:GCKR:G6PC2:SLC2A2:IGF2BP2:CDKAL1:GCK:SLC30A8:GLIS3
GWAScatalog	Glycated hemoglobin levels	78	11	3.41401e-19	7.74554e-17	TCF7L2:KCNQ1:FADS2:MTNR1B:FTO:G6PC2:ADCY5:SLC2A2:CDKAL1:GCK:SLC30A8
GWAScatalog	Fasting plasma glucose	38	8	9.96969e-16	2.01055e-13	MTNR1B:GCKR:G6PC2:SLC2A2:CDKAL1:GCK:SLC30A8:GLIS3
GO_bp	GO_CARBOHYDRATE_HOMEOSTASIS	241	12	2.77898e-15	2.04255e-11	HKDC1:TCF7L2:KCNJ11:CRY2:MTNR1B:GCKR:G6PC2:IRS1:BACE2:PPARG:ADCY5:GCK	http://www.gsea-msigdb.org/gsea/msigdb/cards/GO_CARBOHYDRATE_HOMEOSTASIS
GWAScatalog	Triglycerides	184	11	5.87275e-15	1.0659e-12	PROX1:FADS2:FADS1:FTO:CMIP:PEPD:GCKR:IRS1:SLC2A2:GCK:SLC30A8
GWAScatalog	Metabolic syndrome	53	8	1.77492e-14	2.92862e-12	TCF7L2:FADS2:FADS1:MTNR1B:FTO:GCKR:G6PC2:GCK
GWAScatalog	Offspring birth weight	153	10	4.49292e-14	6.79554e-12	HKDC1:TCF7L2:KCNQ1:MTNR1B:G6PC2:ADCY5:RREB1:GCK:GLIS3:GPSM1
GWAScatalog	Glycemic traits (pregnancy)	18	6	2.02915e-13	2.83301e-11	HKDC1:MTNR1B:GCKR:G6PC2:BACE2:PCSK1
GWAScatalog	Birth weight	278	11	5.47758e-13	6.86005e-11	PROX1:HKDC1:KCNQ1:MTNR1B:PEPD:IRS1:ADCY5:RREB1:CDKAL1:GCK:GPSM1
GWAScatalog	Type 2 diabetes (adjusted for BMI)	44	7	5.66946e-13	6.86005e-11	KCNJ11:GCKR:PPARG:IGF2BP2:RREB1:SLC30A8:GPSM1
GO_bp	GO_INSULIN_SECRETION	205	10	8.51902e-13	2.39193e-09	TCF7L2:KCNJ11:MTNR1B:HNF1B:G6PC2:IRS1:ADCY5:SLC2A2:GCK:SLC30A8	http://www.gsea-msigdb.org/gsea/msigdb/cards/GO_INSULIN_SECRETION
GO_bp	GO_REGULATION_OF_HORMONE_LEVELS	513	13	9.76296e-13	2.39193e-09	TCF7L2:KCNJ11:MTNR1B:HNF1B:G6PC2:IRS1:BACE2:ADCY5:SLC2A2:SPP1:PCSK1:GCK:SLC30A8	http://www.gsea-msigdb.org/gsea/msigdb/cards/GO_REGULATION_OF_HORMONE_LEVELS
GO_bp	GO_HORMONE_TRANSPORT	319	11	2.43525e-12	4.47476e-09	TCF7L2:KCNJ11:MTNR1B:HNF1B:G6PC2:IRS1:ADCY5:SLC2A2:SPP1:GCK:SLC30A8	http://www.gsea-msigdb.org/gsea/msigdb/cards/GO_HORMONE_TRANSPORT
GO_bp	GO_PEPTIDE_HORMONE_SECRETION	248	10	5.65645e-12	8.31498e-09	TCF7L2:KCNJ11:MTNR1B:HNF1B:G6PC2:IRS1:ADCY5:SLC2A2:GCK:SLC30A8	http://www.gsea-msigdb.org/gsea/msigdb/cards/GO_PEPTIDE_HORMONE_SECRETION
GWAScatalog	Fasting blood glucose adjusted for BMI	12	5	6.12036e-12	6.94278e-10	GCKR:G6PC2:PCSK1:RREB1:SLC30A8
GO_bp	GO_REGULATION_OF_INSULIN_SECRETION	173	9	7.20965e-12	8.83182e-09	TCF7L2:KCNJ11:MTNR1B:G6PC2:IRS1:ADCY5:SLC2A2:GCK:SLC30A8	http://www.gsea-msigdb.org/gsea/msigdb/cards/GO_REGULATION_OF_INSULIN_SECRETION
GO_bp	GO_REGULATION_OF_HORMONE_SECRETION	263	10	1.01059e-11	1.06112e-08	TCF7L2:KCNJ11:MTNR1B:G6PC2:IRS1:ADCY5:SLC2A2:SPP1:GCK:SLC30A8	http://www.gsea-msigdb.org/gsea/msigdb/cards/GO_REGULATION_OF_HORMONE_SECRETION
GO_bp	GO_REGULATION_OF_PEPTIDE_HORMONE_SECRETION	205	9	3.30678e-11	3.0381e-08	TCF7L2:KCNJ11:MTNR1B:G6PC2:IRS1:ADCY5:SLC2A2:GCK:SLC30A8	http://www.gsea-msigdb.org/gsea/msigdb/cards/GO_REGULATION_OF_PEPTIDE_HORMONE_SECRETION
GO_bp	GO_SIGNAL_RELEASE	460	11	1.22389e-10	9.99512e-08	TCF7L2:KCNJ11:MTNR1B:HNF1B:G6PC2:IRS1:ADCY5:SLC2A2:SPP1:GCK:SLC30A8	http://www.gsea-msigdb.org/gsea/msigdb/cards/GO_SIGNAL_RELEASE
GWAScatalog	HDL cholesterol	242	9	1.44852e-10	1.5465e-08	MADD:FADS2:FADS1:FTO:CMIP:PEPD:IRS1:PPARG:RP11-115J16.1
GWAScatalog	Fasting blood insulin (BMI interaction)	23	5	2.56659e-10	2.58798e-08	TCF7L2:PEPD:GCKR:IRS1:PPARG
GO_bp	GO_CELL_CELL_SIGNALING	1638	17	2.6935e-10	1.97973e-07	GRID1:TCF7L2:KCNQ1:KCNJ11:FADS1:MTNR1B:PGR:HNF1B:G6PC2:IRS1:ADCY5:SLC2A2:SPP1:PCSK1:GCK:SLC30A8:PTPRD	http://www.gsea-msigdb.org/gsea/msigdb/cards/GO_CELL_CELL_SIGNALING
GWAScatalog	Pulse pressure	690	12	6.06127e-10	5.79011e-08	TCF7L2:KCNJ11:FADS2:MTNR1B:FTO:CFDP1:G6PC2:ADCY5:RREB1:CDKAL1:GCK:PTPRD
GWAScatalog	Peak insulin response	12	4	2.63283e-09	2.38929e-07	TCF7L2:MTNR1B:IGF2BP2:CDKAL1
GWAScatalog	Triglyceride levels	145	7	3.02623e-09	2.61552e-07	FADS2:FADS1:FTO:CMIP:PEPD:GCKR:IRS1
GWAScatalog	Heel bone mineral density	834	12	5.08019e-09	4.19115e-07	TCF7L2:FADS2:FTO:CMIP:HDAC5:ARHGAP15:IRS1:PPARG:ADCY5:IGF2BP2:RREB1:PTPRD
GWAScatalog	Proinsulin levels	14	4	5.31181e-09	4.19171e-07	TCF7L2:MADD:PCSK1:SLC30A8
GWAScatalog	Bitter alcoholic beverage consumption	91	6	6.67674e-09	5.04929e-07	TCF7L2:AGBL1:PEPD:GCKR:ARHGAP15:PTPRD
GWAScatalog	Fasting blood insulin	15	4	7.23496e-09	5.25258e-07	TCF7L2:GCKR:IRS1:PPARG
GO_bp	GO_CHEMICAL_HOMEOSTASIS	1177	13	2.45459e-08	1.52367e-05	HKDC1:TCF7L2:KCNJ11:CRY2:MTNR1B:GCKR:G6PC2:IRS1:BACE2:PPARG:ADCY5:GCK:SLC30A8	http://www.gsea-msigdb.org/gsea/msigdb/cards/GO_CHEMICAL_HOMEOSTASIS
GO_bp	GO_PEPTIDE_SECRETION	591	10	2.48762e-08	1.52367e-05	TCF7L2:KCNJ11:MTNR1B:HNF1B:G6PC2:IRS1:ADCY5:SLC2A2:GCK:SLC30A8	http://www.gsea-msigdb.org/gsea/msigdb/cards/GO_PEPTIDE_SECRETION
GWAScatalog	Waist-hip ratio	115	6	2.73866e-08	1.9118e-06	FTO:PEPD:IRS1:PPARG:RREB1:PTPRD
GO_bp	GO_REGULATION_OF_SECRETION	782	11	3.03336e-08	1.71502e-05	TCF7L2:KCNQ1:KCNJ11:MTNR1B:G6PC2:IRS1:ADCY5:SLC2A2:SPP1:GCK:SLC30A8	http://www.gsea-msigdb.org/gsea/msigdb/cards/GO_REGULATION_OF_SECRETION
GWAScatalog	Metabolite levels	117	6	3.03688e-08	2.04146e-06	FADS2:FADS1:MTNR1B:GCKR:G6PC2:GCK
GO_bp	GO_REGULATION_OF_PEPTIDE_SECRETION	471	9	4.76362e-08	2.5009e-05	TCF7L2:KCNJ11:MTNR1B:G6PC2:IRS1:ADCY5:SLC2A2:GCK:SLC30A8	http://www.gsea-msigdb.org/gsea/msigdb/cards/GO_REGULATION_OF_PEPTIDE_SECRETION
GO_bp	GO_RESPONSE_TO_CARBOHYDRATE	228	7	6.87354e-08	3.36804e-05	TCF7L2:KCNJ11:HNF1B:GCKR:ADCY5:GCK:SLC30A8	http://www.gsea-msigdb.org/gsea/msigdb/cards/GO_RESPONSE_TO_CARBOHYDRATE
GWAScatalog	Glucose homeostasis traits	73	5	1.07971e-07	6.99885e-06	KCNQ1:MTNR1B:GCKR:IRS1:CDKAL1
GWAScatalog	Glycemic traits	7	3	1.26406e-07	7.91124e-06	MTNR1B:CDKAL1:GCK
GO_bp	GO_NEGATIVE_REGULATION_OF_BIOSYNTHETIC_PROCESS	1612	14	1.28075e-07	5.88344e-05	PROX1:TCF7L2:CRY2:HMG20A:FTO:HNF1B:HDAC5:BACE2:PPARG:IGF2BP2:RREB1:GCK:GLIS3:NACC2	http://www.gsea-msigdb.org/gsea/msigdb/cards/GO_NEGATIVE_REGULATION_OF_BIOSYNTHETIC_PROCESS
GWAScatalog	Body mass index	1365	13	1.3726e-07	8.30423e-06	GRID1:TCF7L2:KCNQ1:KCNJ11:FTO:HNF1B:BACE2:PPARG:ADCY5:IGF2BP2:PCSK1:CDKAL1:SLC30A8
GO_bp	GO_HOMEOSTATIC_PROCESS	1906	15	1.48383e-07	6.41539e-05	HKDC1:TCF7L2:KCNJ11:CRY2:MTNR1B:FTO:GCKR:G6PC2:IRS1:BACE2:PPARG:ADCY5:SPP1:GCK:SLC30A8	http://www.gsea-msigdb.org/gsea/msigdb/cards/GO_HOMEOSTATIC_PROCESS
GWAScatalog	Medication use (HMG CoA reductase inhibitors)	78	5	1.50857e-07	8.83241e-06	TCF7L2:FTO:GCKR:PPARG:IGF2BP2
GWAScatalog	HDL cholesterol levels	154	6	1.55947e-07	8.8451e-06	FADS2:FADS1:FTO:CMIP:PEPD:IRS1
GWAScatalog	Metabolite levels (small molecules and protein measures)	38	4	3.80934e-07	2.09513e-05	MTNR1B:GCKR:G6PC2:GCK
GWAScatalog	C-reactive protein levels	96	5	4.27561e-07	2.28242e-05	MADD:OASL:FTO:GCKR:SLC2A2
Hallmark_gene_sets	HALLMARK_PANCREAS_BETA_CELLS	40	4	4.70538e-07	2.35269e-05	G6PC2:SLC2A2:PCSK1:GCK	http://www.gsea-msigdb.org/gsea/msigdb/cards/HALLMARK_PANCREAS_BETA_CELLS
GO_bp	GO_NEGATIVE_REGULATION_OF_TRANSCRIPTION_BY_RNA_POLYMERASE_II	818	10	5.01859e-07	0.000204926	PROX1:TCF7L2:CRY2:HMG20A:HNF1B:HDAC5:PPARG:RREB1:GLIS3:NACC2	http://www.gsea-msigdb.org/gsea/msigdb/cards/GO_NEGATIVE_REGULATION_OF_TRANSCRIPTION_BY_RNA_POLYMERASE_II
GO_bp	GO_GLUCOSE_6_PHOSPHATE_METABOLIC_PROCESS	11	3	5.93271e-07	0.000229502	HKDC1:G6PC2:GCK	http://www.gsea-msigdb.org/gsea/msigdb/cards/GO_GLUCOSE_6_PHOSPHATE_METABOLIC_PROCESS
GWAScatalog	Fasting blood proinsulin levels	11	3	5.93271e-07	2.99108e-05	MADD:PCSK1:SLC30A8
GWAScatalog	Acute insulin response	11	3	5.93271e-07	2.99108e-05	MTNR1B:IGF2BP2:CDKAL1
Curated_gene_sets	PID_HNF3B_PATHWAY	45	4	7.62689e-07	0.00250547	KCNJ11:HNF1B:SLC2A2:GCK	http://www.gsea-msigdb.org/gsea/msigdb/cards/PID_HNF3B_PATHWAY
Canonical_Pathways	PID_HNF3B_PATHWAY	45	4	7.62689e-07	0.00100155	KCNJ11:HNF1B:SLC2A2:GCK	http://www.gsea-msigdb.org/gsea/msigdb/cards/PID_HNF3B_PATHWAY
Curated_gene_sets	KEGG_TYPE_II_DIABETES_MELLITUS	47	4	9.10914e-07	0.00250547	KCNJ11:IRS1:SLC2A2:GCK	http://www.gsea-msigdb.org/gsea/msigdb/cards/KEGG_TYPE_II_DIABETES_MELLITUS
KEGG	KEGG_TYPE_II_DIABETES_MELLITUS	47	4	9.10914e-07	0.00016943	KCNJ11:IRS1:SLC2A2:GCK	http://www.gsea-msigdb.org/gsea/msigdb/cards/KEGG_TYPE_II_DIABETES_MELLITUS
Canonical_Pathways	KEGG_TYPE_II_DIABETES_MELLITUS	47	4	9.10914e-07	0.00100155	KCNJ11:IRS1:SLC2A2:GCK	http://www.gsea-msigdb.org/gsea/msigdb/cards/KEGG_TYPE_II_DIABETES_MELLITUS
GO_bp	GO_SECRETION	1628	13	1.01298e-06	0.000372269	TCF7L2:KCNQ1:KCNJ11:MTNR1B:HNF1B:G6PC2:IRS1:ADCY5:SLC2A2:SPP1:GCK:MGAM:SLC30A8	http://www.gsea-msigdb.org/gsea/msigdb/cards/GO_SECRETION
GWAScatalog	Menarche (age at onset)	217	6	1.16527e-06	5.71611e-05	PGR:FTO:CMIP:IGF2BP2:PCSK1:PTPRD
GWAScatalog	Metabolic traits	51	4	1.27033e-06	6.02987e-05	FADS1:MTNR1B:GCKR:G6PC2
GWAScatalog	White blood cell count	221	6	1.29567e-06	6.02987e-05	FADS1:GCKR:ARHGAP15:SPC25:RREB1:GPSM1
GWAScatalog	Cholesterol, total	121	5	1.34994e-06	6.12537e-05	FADS2:FADS1:GCKR:FAM117B:PPARG
GWAScatalog	Myeloid white cell count	124	5	1.5235e-06	6.74429e-05	FADS2:FADS1:GCKR:SPC25:RREB1
GO_bp	GO_REGULATION_OF_ESTABLISHMENT_OF_PROTEIN_LOCALIZATION	723	9	1.71647e-06	0.000600766	TCF7L2:KCNJ11:MTNR1B:G6PC2:IRS1:ADCY5:SLC2A2:GCK:SLC30A8	http://www.gsea-msigdb.org/gsea/msigdb/cards/GO_REGULATION_OF_ESTABLISHMENT_OF_PROTEIN_LOCALIZATION
GO_mf	GO_PROXIMAL_PROMOTER_SEQUENCE_SPECIFIC_DNA_BINDING	538	8	1.8547e-06	0.00305098	PROX1:TCF7L2:PGR:HNF1B:HDAC5:PPARG:RREB1:NACC2	http://www.gsea-msigdb.org/gsea/msigdb/cards/GO_PROXIMAL_PROMOTER_SEQUENCE_SPECIFIC_DNA_BINDING
GWAScatalog	Gout	56	4	1.85627e-06	8.02173e-05	KCNQ1:GCKR:LHFPL3:PTPRD
GWAScatalog	Chronic kidney disease	134	5	2.23249e-06	9.42317e-05	KCNQ1:MADD:GCKR:ADCY5:RREB1
GWAScatalog	Chronotype	556	8	2.36593e-06	9.75946e-05	LPHN2:TCF7L2:MADD:MTNR1B:FTO:ARHGAP15:ADCY5:PTPRD
GWAScatalog	Stearic acid (18:0) levels	17	3	2.42877e-06	9.79603e-05	GRID1:FADS2:FADS1
GO_bp	GO_CARBOHYDRATE_METABOLIC_PROCESS	559	8	2.46183e-06	0.000822475	HKDC1:KCNJ11:GCKR:G6PC2:IRS1:SLC2A2:GCK:MGAM	http://www.gsea-msigdb.org/gsea/msigdb/cards/GO_CARBOHYDRATE_METABOLIC_PROCESS
GO_bp	GO_REGULATION_OF_TRANSPORT	1827	13	3.62733e-06	0.00115917	TCF7L2:KCNQ1:KCNJ11:CRY2:MTNR1B:G6PC2:IRS1:PPARG:ADCY5:SLC2A2:SPP1:GCK:SLC30A8	http://www.gsea-msigdb.org/gsea/msigdb/cards/GO_REGULATION_OF_TRANSPORT
GWAScatalog	Hematocrit	148	5	3.63498e-06	0.000143424	PROX1:GCKR:PPARG:RREB1:GLIS3
GWAScatalog	Plasma omega-3 polyunsaturated fatty acid levels (docosapentaenoic acid)	20	3	4.05823e-06	0.000156717	FADS2:FADS1:GCKR
GO_mf	GO_CARBOHYDRATE_BINDING	270	6	4.11442e-06	0.00338411	LPHN2:HKDC1:PKD1L2:GCKR:GCK:MGAM	http://www.gsea-msigdb.org/gsea/msigdb/cards/GO_CARBOHYDRATE_BINDING
GO_bp	GO_MONOSACCHARIDE_METABOLIC_PROCESS	153	5	4.27618e-06	0.00130958	HKDC1:KCNJ11:GCKR:IRS1:GCK	http://www.gsea-msigdb.org/gsea/msigdb/cards/GO_MONOSACCHARIDE_METABOLIC_PROCESS
GO_bp	GO_RHYTHMIC_PROCESS	279	6	4.9644e-06	0.00145953	PROX1:CRY2:MTNR1B:PGR:HNF1B:PPARG	http://www.gsea-msigdb.org/gsea/msigdb/cards/GO_RHYTHMIC_PROCESS
Wikipathways	Type II diabetes mellitus	22	3	5.47001e-06	0.00297022	KCNJ11:IRS1:SLC2A2	http://www.wikipathways.org/instance/WP1584_r106156
GO_bp	GO_RESPONSE_TO_OXYGEN_CONTAINING_COMPOUND	1603	12	5.51265e-06	0.00155838	TCF7L2:KCNQ1:KCNJ11:HNF1B:HDAC5:GCKR:IRS1:PPARG:ADCY5:SPP1:GCK:SLC30A8	http://www.gsea-msigdb.org/gsea/msigdb/cards/GO_RESPONSE_TO_OXYGEN_CONTAINING_COMPOUND
GWAScatalog	Lymphocyte counts	163	5	5.82327e-06	0.000220192	HKDC1:GCKR:ARHGAP15:ADCY5:RREB1
GWAScatalog	Waist circumference	165	5	6.17944e-06	0.000228093	TCF7L2:FTO:IRS1:HAPLN1:PCSK1
GWAScatalog	Palmitoleic acid (16:1n-7) levels	23	3	6.28354e-06	0.000228093	FADS2:FADS1:GCKR
GO_mf	GO_SEQUENCE_SPECIFIC_DOUBLE_STRANDED_DNA_BINDING	860	9	7.00626e-06	0.00384176	PROX1:TCF7L2:CRY2:PGR:HNF1B:HDAC5:PPARG:RREB1:NACC2	http://www.gsea-msigdb.org/gsea/msigdb/cards/GO_SEQUENCE_SPECIFIC_DOUBLE_STRANDED_DNA_BINDING
GWAScatalog	Waist-to-hip ratio adjusted for BMI x sex interaction	25	3	8.14236e-06	0.00027972	CMIP:IRS1:PTPRD
Curated_gene_sets	KEGG_MATURITY_ONSET_DIABETES_OF_THE_YOUNG	25	3	8.14236e-06	0.0126443	HNF1B:SLC2A2:GCK	http://www.gsea-msigdb.org/gsea/msigdb/cards/KEGG_MATURITY_ONSET_DIABETES_OF_THE_YOUNG
KEGG	KEGG_MATURITY_ONSET_DIABETES_OF_THE_YOUNG	25	3	8.14236e-06	0.00057004	HNF1B:SLC2A2:GCK	http://www.gsea-msigdb.org/gsea/msigdb/cards/KEGG_MATURITY_ONSET_DIABETES_OF_THE_YOUNG
Canonical_Pathways	KEGG_MATURITY_ONSET_DIABETES_OF_THE_YOUNG	25	3	8.14236e-06	0.00505451	HNF1B:SLC2A2:GCK	http://www.gsea-msigdb.org/gsea/msigdb/cards/KEGG_MATURITY_ONSET_DIABETES_OF_THE_YOUNG
GWAScatalog	Body mass index (joint analysis main effects and smoking interaction)	81	4	8.16814e-06	0.00027972	GRID1:TCF7L2:FTO:IRS1
GWAScatalog	BMI (adjusted for smoking behaviour)	81	4	8.16814e-06	0.00027972	GRID1:TCF7L2:FTO:IRS1
Curated_gene_sets	KEGG_GALACTOSE_METABOLISM	26	3	9.1942e-06	0.0126443	G6PC2:GCK:MGAM	http://www.gsea-msigdb.org/gsea/msigdb/cards/KEGG_GALACTOSE_METABOLISM
KEGG	KEGG_GALACTOSE_METABOLISM	26	3	9.1942e-06	0.00057004	G6PC2:GCK:MGAM	http://www.gsea-msigdb.org/gsea/msigdb/cards/KEGG_GALACTOSE_METABOLISM
Canonical_Pathways	KEGG_GALACTOSE_METABOLISM	26	3	9.1942e-06	0.00505451	G6PC2:GCK:MGAM	http://www.gsea-msigdb.org/gsea/msigdb/cards/KEGG_GALACTOSE_METABOLISM
GWAScatalog	LDL cholesterol	182	5	9.94588e-06	0.000334292	FADS2:FADS1:GCKR:FAM117B:PPARG
GO_bp	GO_RESPONSE_TO_ORGANIC_CYCLIC_COMPOUND	912	9	1.11962e-05	0.0029745	KCNQ1:KCNJ11:CRY2:PGR:HNF1B:HDAC5:PPARG:ADCY5:SPP1	http://www.gsea-msigdb.org/gsea/msigdb/cards/GO_RESPONSE_TO_ORGANIC_CYCLIC_COMPOUND
GO_bp	GO_CELLULAR_RESPONSE_TO_HORMONE_STIMULUS	689	8	1.13314e-05	0.0029745	CRY2:PGR:HDAC5:IRS1:PPARG:ADCY5:SPP1:GCK	http://www.gsea-msigdb.org/gsea/msigdb/cards/GO_CELLULAR_RESPONSE_TO_HORMONE_STIMULUS
GWAScatalog	Phospholipid levels (plasma)	28	3	1.1559e-05	0.000381448	FADS2:FADS1:GCKR
GO_mf	GO_REGULATORY_REGION_NUCLEIC_ACID_BINDING	934	9	1.35285e-05	0.00517664	PROX1:TCF7L2:CRY2:PGR:HNF1B:HDAC5:PPARG:RREB1:NACC2	http://www.gsea-msigdb.org/gsea/msigdb/cards/GO_REGULATORY_REGION_NUCLEIC_ACID_BINDING
GO_bp	GO_CIRCADIAN_RHYTHM	196	5	1.42265e-05	0.00360568	PROX1:CRY2:MTNR1B:HNF1B:PPARG	http://www.gsea-msigdb.org/gsea/msigdb/cards/GO_CIRCADIAN_RHYTHM
GWAScatalog	Adiponectin levels	30	3	1.42935e-05	0.000455136	CMIP:PEPD:IRS1
GWAScatalog	Gallstone disease	30	3	1.42935e-05	0.000455136	FADS2:HNF1B:GCKR
GWAScatalog	Post bronchodilator FEV1/FVC ratio	199	5	1.53066e-05	0.000478992	PROX1-AS1:TCF7L2:MYO7A:GCKR:PTPRD
Immunologic_signatures	GSE7219_WT_VS_NIK_NFKB2_KO_LPS_AND_ANTI_CD40_STIM_DC_UP	200	5	1.56805e-05	0.0381978	KCNQ1:FADS2:FADS1:PGR:BACE2	http://www.gsea-msigdb.org/gsea/msigdb/cards/GSE7219_WT_VS_NIK_NFKB2_KO_LPS_AND_ANTI_CD40_STIM_DC_UP
Immunologic_signatures	GSE26343_UNSTIM_VS_LPS_STIM_MACROPHAGE_DN	200	5	1.56805e-05	0.0381978	FTO:HDAC5:ARHGAP15:FAM117B:CDKAL1	http://www.gsea-msigdb.org/gsea/msigdb/cards/GSE26343_UNSTIM_VS_LPS_STIM_MACROPHAGE_DN
GO_mf	GO_DOUBLE_STRANDED_DNA_BINDING	952	9	1.57345e-05	0.00517664	PROX1:TCF7L2:CRY2:PGR:HNF1B:HDAC5:PPARG:RREB1:NACC2	http://www.gsea-msigdb.org/gsea/msigdb/cards/GO_DOUBLE_STRANDED_DNA_BINDING
Wikipathways	Circadian rhythm related genes	205	5	1.76582e-05	0.0047942	PROX1:CRY2:MTNR1B:HNF1B:PPARG	http://www.wikipathways.org/instance/WP3594_r106357
GO_bp	GO_RESPONSE_TO_HORMONE	973	9	1.869e-05	0.00447562	KCNJ11:CRY2:PGR:HDAC5:IRS1:PPARG:ADCY5:SPP1:GCK	http://www.gsea-msigdb.org/gsea/msigdb/cards/GO_RESPONSE_TO_HORMONE
GO_bp	GO_REGULATION_OF_CIRCADIAN_RHYTHM	101	4	1.95857e-05	0.00447562	PROX1:CRY2:MTNR1B:PPARG	http://www.gsea-msigdb.org/gsea/msigdb/cards/GO_REGULATION_OF_CIRCADIAN_RHYTHM
GO_bp	GO_NEGATIVE_REGULATION_OF_RNA_BIOSYNTHETIC_PROCESS	1238	10	1.96135e-05	0.00447562	PROX1:TCF7L2:CRY2:HMG20A:HNF1B:HDAC5:PPARG:RREB1:GLIS3:NACC2	http://www.gsea-msigdb.org/gsea/msigdb/cards/GO_NEGATIVE_REGULATION_OF_RNA_BIOSYNTHETIC_PROCESS
GO_bp	GO_REGULATION_OF_PROTEIN_LOCALIZATION	982	9	2.00946e-05	0.00447562	TCF7L2:KCNJ11:MTNR1B:G6PC2:IRS1:ADCY5:SLC2A2:GCK:SLC30A8	http://www.gsea-msigdb.org/gsea/msigdb/cards/GO_REGULATION_OF_PROTEIN_LOCALIZATION
GWAScatalog	Loneliness	102	4	2.03615e-05	0.000624059	TCF7L2:MADD:AGBL1:PTPRD
GWAScatalog	Lipid metabolism phenotypes	34	3	2.09739e-05	0.000624059	FADS2:FADS1:GCKR
GWAScatalog	Endometrial cancer (endometrioid histology)	34	3	2.09739e-05	0.000624059	HNF1B:PPARG:PTPRD
GWAScatalog	Serum metabolite levels	105	4	2.28246e-05	0.000668173	FADS2:FADS1:OASL:GCKR
GWAScatalog	Delta-5 desaturase activity response to n3-polyunsaturated fat supplement	5	2	2.39789e-05	0.000690822	FADS2:FADS1
GO_mf	GO_HEXOKINASE_ACTIVITY	5	2	2.39789e-05	0.00563505	HKDC1:GCK	http://www.gsea-msigdb.org/gsea/msigdb/cards/GO_HEXOKINASE_ACTIVITY
GO_mf	GO_OXIDOREDUCTASE_ACTIVITY_ACTING_ON_PAIRED_DONORS_WITH_OXIDATION_OF_A_PAIR_OF_DONORS_RESULTING_IN_THE_REDUCTION_OF_MOLECULAR_OXYGEN_TO_TWO_MOLECULES_OF_WATER	5	2	2.39789e-05	0.00563505	FADS2:FADS1	http://www.gsea-msigdb.org/gsea/msigdb/cards/GO_OXIDOREDUCTASE_ACTIVITY_ACTING_ON_PAIRED_DONORS_WITH_OXIDATION_OF_A_PAIR_OF_DONORS_RESULTING_IN_THE_REDUCTION_OF_MOLECULAR_OXYGEN_TO_TWO_MOLECULES_OF_WATER
GO_bp	GO_NEGATIVE_REGULATION_OF_INSULIN_SECRETION	38	3	2.94373e-05	0.00636365	KCNJ11:MTNR1B:IRS1	http://www.gsea-msigdb.org/gsea/msigdb/cards/GO_NEGATIVE_REGULATION_OF_INSULIN_SECRETION
GWAScatalog	Systolic blood pressure	793	8	3.09699e-05	0.000878288	TCF7L2:KCNJ11:CFDP1:CMIP:PEPD:CDKAL1:GLIS3:PTPRD
GWAScatalog	Waist-to-hip ratio adjusted for body mass index	114	4	3.15311e-05	0.000880445	TCF7L2:CMIP:PEPD:PPARG
GWAScatalog	HDL cholesterol levels in current drinkers	117	4	3.49102e-05	0.000945174	FADS2:FTO:CMIP:PEPD
GWAScatalog	Corrected insulin response	6	2	3.59323e-05	0.000945174	MTNR1B:CDKAL1
GWAScatalog	Corrected insulin response adjusted for insulin sensitivity index	6	2	3.59323e-05	0.000945174	MTNR1B:CDKAL1
GWAScatalog	Resistant hypertension	6	2	3.59323e-05	0.000945174	IFLTD1:PTPRD
GO_bp	GO_GLUCOSE_METABOLIC_PROCESS	118	4	3.60932e-05	0.00757958	KCNJ11:GCKR:IRS1:GCK	http://www.gsea-msigdb.org/gsea/msigdb/cards/GO_GLUCOSE_METABOLIC_PROCESS
GWAScatalog	Endometrial cancer	41	3	3.70744e-05	0.000961287	HNF1B:PPARG:CDKAL1
Curated_gene_sets	REACTOME_REGULATION_OF_BETA_CELL_DEVELOPMENT	42	3	3.98821e-05	0.0438783	HNF1B:SLC2A2:GCK	http://www.gsea-msigdb.org/gsea/msigdb/cards/REACTOME_REGULATION_OF_BETA_CELL_DEVELOPMENT
Canonical_Pathways	REACTOME_REGULATION_OF_BETA_CELL_DEVELOPMENT	42	3	3.98821e-05	0.0175401	HNF1B:SLC2A2:GCK	http://www.gsea-msigdb.org/gsea/msigdb/cards/REACTOME_REGULATION_OF_BETA_CELL_DEVELOPMENT
GWAScatalog	Hemoglobin concentration	122	4	4.1121e-05	0.00105119	PROX1:PPARG:RREB1:GLIS3
Cancer_modules	MODULE_55	826	8	4.1308e-05	0.0178038	PROX1:KCNQ1:FADS2:FADS1:DAPK2:HNF1B:PEPD:SPP1	http://www.gsea-msigdb.org/gsea/msigdb/cards/MODULE_55
GWAScatalog	Granulocyte count	124	4	4.38183e-05	0.00110459	FADS2:FADS1:GCKR:SPC25
GWAScatalog	Cerebrospinal P-tau181p levels	44	3	4.59084e-05	0.00114142	LPHN2:GLIS3:PTPRD
GO_bp	GO_EPITHELIAL_CELL_PROLIFERATION	415	6	4.65215e-05	0.00949813	PROX1:TCF7L2:PGR:HNF1B:PPARG:RREB1	http://www.gsea-msigdb.org/gsea/msigdb/cards/GO_EPITHELIAL_CELL_PROLIFERATION
GWAScatalog	Sum neutrophil eosinophil counts	126	4	4.66429e-05	0.00114401	FADS2:FADS1:GCKR:SPC25
GO_bp	GO_NEGATIVE_REGULATION_OF_PEPTIDE_HORMONE_SECRETION	45	3	4.91331e-05	0.00963531	KCNJ11:MTNR1B:IRS1	http://www.gsea-msigdb.org/gsea/msigdb/cards/GO_NEGATIVE_REGULATION_OF_PEPTIDE_HORMONE_SECRETION
GWAScatalog	Metabolite levels (lipid measures)	7	2	5.02546e-05	0.00121616	FADS2:FADS1
Wikipathways	Metabolism of alpha-linolenic acid	7	2	5.02546e-05	0.00909608	FADS2:FADS1	http://www.wikipathways.org/instance/WP4586_r106804
GO_mf	GO_LBD_DOMAIN_BINDING	7	2	5.02546e-05	0.00980375	PROX1:PPARG	http://www.gsea-msigdb.org/gsea/msigdb/cards/GO_LBD_DOMAIN_BINDING
GO_bp	GO_SMALL_MOLECULE_METABOLIC_PROCESS	1685	11	5.07719e-05	0.00963531	PROX1:HKDC1:KCNJ11:FADS2:FADS1:PEPD:GCKR:G6PC2:IRS1:PPARG:GCK	http://www.gsea-msigdb.org/gsea/msigdb/cards/GO_SMALL_MOLECULE_METABOLIC_PROCESS
GO_bp	GO_POSITIVE_REGULATION_OF_HORMONE_SECRETION	129	4	5.11261e-05	0.00963531	TCF7L2:SPP1:GCK:SLC30A8	http://www.gsea-msigdb.org/gsea/msigdb/cards/GO_POSITIVE_REGULATION_OF_HORMONE_SECRETION
GWAScatalog	HDL cholesterol levels x alcohol consumption (regular vs non-regular drinkers) interaction (2df)	129	4	5.11261e-05	0.00122097	FADS2:FTO:CMIP:PEPD
TF_targets	HNF4_01_B	258	5	5.28981e-05	0.0322679	LPHN2:PROX1:CRY2:HNF1B:PEPD	http://www.gsea-msigdb.org/gsea/msigdb/cards/HNF4_01_B
GO_mf	GO_SEQUENCE_SPECIFIC_DNA_BINDING	1114	9	5.36376e-05	0.00980375	PROX1:TCF7L2:CRY2:PGR:HNF1B:HDAC5:PPARG:RREB1:NACC2	http://www.gsea-msigdb.org/gsea/msigdb/cards/GO_SEQUENCE_SPECIFIC_DNA_BINDING
GO_bp	GO_CELLULAR_CARBOHYDRATE_METABOLIC_PROCESS	260	5	5.48671e-05	0.0100818	HKDC1:GCKR:IRS1:GCK:MGAM	http://www.gsea-msigdb.org/gsea/msigdb/cards/GO_CELLULAR_CARBOHYDRATE_METABOLIC_PROCESS
GWAScatalog	Sum basophil neutrophil counts	132	4	5.59163e-05	0.00131803	FADS2:GCKR:SPC25:RREB1
GO_bp	GO_REGULATION_OF_ANATOMICAL_STRUCTURE_MORPHOGENESIS	1130	9	5.98552e-05	0.0107301	PROX1:CFDP1:HNF1B:HDAC5:ARHGAP15:PPARG:SPP1:RREB1:PTPRD	http://www.gsea-msigdb.org/gsea/msigdb/cards/GO_REGULATION_OF_ANATOMICAL_STRUCTURE_MORPHOGENESIS
GWAScatalog	circulating leptin levels	8	2	6.69388e-05	0.00153119	FTO:GCKR
GWAScatalog	Adiposity	8	2	6.69388e-05	0.00153119	FTO:IRS1
Curated_gene_sets	REACTOME_LINOLEIC_ACID_LA_METABOLISM	8	2	6.69388e-05	0.0464104	FADS2:FADS1	http://www.gsea-msigdb.org/gsea/msigdb/cards/REACTOME_LINOLEIC_ACID_LA_METABOLISM
Canonical_Pathways	REACTOME_LINOLEIC_ACID_LA_METABOLISM	8	2	6.69388e-05	0.023853	FADS2:FADS1	http://www.gsea-msigdb.org/gsea/msigdb/cards/REACTOME_LINOLEIC_ACID_LA_METABOLISM
GWAScatalog	Alzheimer's disease or fasting glucose levels (pleiotropy)	50	3	6.74904e-05	0.00153119	TCF7L2:CRY2:MADD
Curated_gene_sets	MARTINEZ_RESPONSE_TO_TRABECTEDIN	50	3	6.74904e-05	0.0464104	FTO:IRS1:PPARG	http://www.gsea-msigdb.org/gsea/msigdb/cards/MARTINEZ_RESPONSE_TO_TRABECTEDIN
GWAScatalog	HDL cholesterol levels x alcohol consumption (drinkers vs non-drinkers) interaction (2df)	139	4	6.83586e-05	0.00153174	FADS2:FTO:CMIP:PEPD
Wikipathways	Wnt Signaling Pathway (Netpath)	51	3	7.16292e-05	0.00972366	TCF7L2:GCKR:PPARG	http://www.wikipathways.org/instance/WP363_r107433
Curated_gene_sets	DELACROIX_RAR_BOUND_ES	453	6	7.54323e-05	0.0464104	TCF7L2:SPC25:G6PC2:SPP1:RREB1:NACC2	http://www.gsea-msigdb.org/gsea/msigdb/cards/DELACROIX_RAR_BOUND_ES
Curated_gene_sets	KEGG_STARCH_AND_SUCROSE_METABOLISM	52	3	7.59305e-05	0.0464104	G6PC2:GCK:MGAM	http://www.gsea-msigdb.org/gsea/msigdb/cards/KEGG_STARCH_AND_SUCROSE_METABOLISM
KEGG	KEGG_STARCH_AND_SUCROSE_METABOLISM	52	3	7.59305e-05	0.00353077	G6PC2:GCK:MGAM	http://www.gsea-msigdb.org/gsea/msigdb/cards/KEGG_STARCH_AND_SUCROSE_METABOLISM
Canonical_Pathways	KEGG_STARCH_AND_SUCROSE_METABOLISM	52	3	7.59305e-05	0.023853	G6PC2:GCK:MGAM	http://www.gsea-msigdb.org/gsea/msigdb/cards/KEGG_STARCH_AND_SUCROSE_METABOLISM
GWAScatalog	Chronic obstructive pulmonary disease	144	4	7.84029e-05	0.00173538	CFDP1:ADCY5:RREB1:GLIS3
GWAScatalog	Granulocyte percentage of myeloid white cells	146	4	8.27065e-05	0.00180858	TCF7L2:FADS2:FADS1:GCKR
GWAScatalog	Laryngeal squamous cell carcinoma	9	2	8.59777e-05	0.00185773	FADS2:FADS1
GO_bp	GO_CELLULAR_GLUCOSE_HOMEOSTASIS	150	4	9.18261e-05	0.0160696	HKDC1:KCNJ11:ADCY5:GCK	http://www.gsea-msigdb.org/gsea/msigdb/cards/GO_CELLULAR_GLUCOSE_HOMEOSTASIS
GO_mf	GO_NUCLEAR_HORMONE_RECEPTOR_BINDING	150	4	9.18261e-05	0.0151054	PROX1:TCF7L2:OASL:PPARG	http://www.gsea-msigdb.org/gsea/msigdb/cards/GO_NUCLEAR_HORMONE_RECEPTOR_BINDING
GWAScatalog	Obesity	56	3	9.48185e-05	0.00200111	PROX1:FTO:LHFPL3
GWAScatalog	Waist-to-hip ratio adjusted for BMI (joint analysis for main effect and physical activity interaction)	56	3	9.48185e-05	0.00200111	CMIP:PEPD:PPARG
GWAScatalog	Medication use (agents acting on the renin-angiotensin system)	153	4	9.91299e-05	0.00206806	FTO:CFDP1:CMIP:ARHGAP15
GWAScatalog	Plasma omega-3 polyunsaturated fatty acid levels (alphalinolenic acid)	10	2	0.000107364	0.00221438	FADS2:FADS1
GO_bp	GO_POSITIVE_REGULATION_OF_TRANSPORT	950	8	0.00010948	0.0187135	TCF7L2:KCNQ1:KCNJ11:IRS1:PPARG:SPP1:GCK:SLC30A8	http://www.gsea-msigdb.org/gsea/msigdb/cards/GO_POSITIVE_REGULATION_OF_TRANSPORT
GO_bp	GO_REGULATION_OF_CELL_DIFFERENTIATION	1844	11	0.000113744	0.0190005	PROX1:TCF7L2:FADS1:HMG20A:FTO:HNF1B:HDAC5:PPARG:SPP1:RREB1:PTPRD	http://www.gsea-msigdb.org/gsea/msigdb/cards/GO_REGULATION_OF_CELL_DIFFERENTIATION
GWAScatalog	Mood instability	61	3	0.000122427	0.00249668	TCF7L2:ARHGAP15:PTPRD
GWAScatalog	BMI in non-smokers	62	3	0.00012851	0.00259161	TCF7L2:FTO:IRS1
microRNA_targets	ACCAAAG_MIR9	500	6	0.000129347	0.0285858	HMG20A:HNF1B:HDAC5:FAM117B:IGF2BP2:SLC30A8	http://www.gsea-msigdb.org/gsea/msigdb/cards/ACCAAAG_MIR9
GWAScatalog	Body mass index (SNP x SNP interaction)	11	2	0.000131091	0.00261462	FTO:CDKAL1
GO_mf	GO_GLUCOSE_BINDING	11	2	0.000131091	0.0196041	HKDC1:GCK	http://www.gsea-msigdb.org/gsea/msigdb/cards/GO_GLUCOSE_BINDING
GO_bp	GO_CELLULAR_RESPONSE_TO_PEPTIDE_HORMONE_STIMULUS	315	5	0.000135111	0.0220682	HDAC5:IRS1:PPARG:ADCY5:GCK	http://www.gsea-msigdb.org/gsea/msigdb/cards/GO_CELLULAR_RESPONSE_TO_PEPTIDE_HORMONE_STIMULUS
GO_bp	GO_NEGATIVE_REGULATION_OF_HORMONE_SECRETION	66	3	0.000154802	0.0247347	KCNJ11:MTNR1B:IRS1	http://www.gsea-msigdb.org/gsea/msigdb/cards/GO_NEGATIVE_REGULATION_OF_HORMONE_SECRETION
GWAScatalog	Neutrophil count	173	4	0.000159064	0.00313805	FADS2:GCKR:SPC25:RREB1
GWAScatalog	Obesity-related traits	756	7	0.000171654	0.00335003	LPHN2:MTNR1B:FTO:ADCY5:CDKAL1:SLC30A8:PTPRD
Canonical_Pathways	REACTOME_DISORDERS_OF_TRANSMEMBRANE_TRANSPORTERS	177	4	0.000173626	0.045333	KCNJ11:GCKR:SLC2A2:GCK	http://www.gsea-msigdb.org/gsea/msigdb/cards/REACTOME_DISORDERS_OF_TRANSMEMBRANE_TRANSPORTERS
GO_mf	GO_DNA_BINDING_TRANSCRIPTION_FACTOR_BINDING	336	5	0.000182357	0.0231761	PROX1:TCF7L2:OASL:HDAC5:PPARG	http://www.gsea-msigdb.org/gsea/msigdb/cards/GO_DNA_BINDING_TRANSCRIPTION_FACTOR_BINDING
GO_bp	GO_POSITIVE_REGULATION_OF_INSULIN_SECRETION	70	3	0.000184363	0.0279006	TCF7L2:GCK:SLC30A8	http://www.gsea-msigdb.org/gsea/msigdb/cards/GO_POSITIVE_REGULATION_OF_INSULIN_SECRETION
GO_bp	GO_ALPHA_LINOLENIC_ACID_METABOLIC_PROCESS	13	2	0.000185537	0.0279006	FADS2:FADS1	http://www.gsea-msigdb.org/gsea/msigdb/cards/GO_ALPHA_LINOLENIC_ACID_METABOLIC_PROCESS
Canonical_Pathways	REACTOME_ALPHA_LINOLENIC_OMEGA3_AND_LINOLEIC_OMEGA6_ACID_METABOLISM	13	2	0.000185537	0.045333	FADS2:FADS1	http://www.gsea-msigdb.org/gsea/msigdb/cards/REACTOME_ALPHA_LINOLENIC_OMEGA3_AND_LINOLEIC_OMEGA6_ACID_METABOLISM
GO_mf	GO_REPRESSING_TRANSCRIPTION_FACTOR_BINDING	71	3	0.000192284	0.0231761	TCF7L2:HDAC5:PPARG	http://www.gsea-msigdb.org/gsea/msigdb/cards/GO_REPRESSING_TRANSCRIPTION_FACTOR_BINDING
GO_bp	GO_CELLULAR_RESPONSE_TO_ORGANIC_CYCLIC_COMPOUND	539	6	0.00019417	0.0279006	KCNQ1:CRY2:PGR:PPARG:ADCY5:SPP1	http://www.gsea-msigdb.org/gsea/msigdb/cards/GO_CELLULAR_RESPONSE_TO_ORGANIC_CYCLIC_COMPOUND
GO_mf	GO_HORMONE_RECEPTOR_BINDING	183	4	0.000197243	0.0231761	PROX1:TCF7L2:OASL:PPARG	http://www.gsea-msigdb.org/gsea/msigdb/cards/GO_HORMONE_RECEPTOR_BINDING
GO_bp	GO_RESPONSE_TO_ENDOGENOUS_STIMULUS	1634	10	0.000198184	0.0279006	KCNQ1:KCNJ11:CRY2:PGR:HDAC5:IRS1:PPARG:ADCY5:SPP1:GCK	http://www.gsea-msigdb.org/gsea/msigdb/cards/GO_RESPONSE_TO_ENDOGENOUS_STIMULUS
GO_bp	GO_POSITIVE_REGULATION_OF_BIOSYNTHETIC_PROCESS	1966	11	0.000199514	0.0279006	PROX1:TCF7L2:PGR:HNF1B:HDAC5:IRS1:PPARG:SPP1:RREB1:GCK:GLIS3	http://www.gsea-msigdb.org/gsea/msigdb/cards/GO_POSITIVE_REGULATION_OF_BIOSYNTHETIC_PROCESS
GO_bp	GO_REGULATION_OF_SMALL_MOLECULE_METABOLIC_PROCESS	343	5	0.000200618	0.0279006	PROX1:GCKR:IRS1:PPARG:GCK	http://www.gsea-msigdb.org/gsea/msigdb/cards/GO_REGULATION_OF_SMALL_MOLECULE_METABOLIC_PROCESS
GO_bp	GO_CARBOHYDRATE_CATABOLIC_PROCESS	185	4	0.000205606	0.0279006	HKDC1:GCKR:GCK:MGAM	http://www.gsea-msigdb.org/gsea/msigdb/cards/GO_CARBOHYDRATE_CATABOLIC_PROCESS
GO_bp	GO_GLUCAN_METABOLIC_PROCESS	73	3	0.00020878	0.0279006	IRS1:GCK:MGAM	http://www.gsea-msigdb.org/gsea/msigdb/cards/GO_GLUCAN_METABOLIC_PROCESS
GO_bp	GO_REGULATION_OF_GLUCOSE_METABOLIC_PROCESS	73	3	0.00020878	0.0279006	GCKR:IRS1:GCK	http://www.gsea-msigdb.org/gsea/msigdb/cards/GO_REGULATION_OF_GLUCOSE_METABOLIC_PROCESS
GWAScatalog	Lean body mass	73	3	0.00020878	0.00402562	FTO:IRS1:PTPRD
GWAScatalog	Platelet count	348	5	0.000214493	0.00402562	FADS2:FADS1:GCKR:PPARG:IGF2BP2
GWAScatalog	Sphingolipid levels	14	2	0.000216243	0.00402562	FADS2:FADS1
GWAScatalog	Alcohol consumption (drinks per week)	74	3	0.000217361	0.00402562	TCF7L2:GCKR:ARHGAP15
GWAScatalog	Chin dimples	74	3	0.000217361	0.00402562	TCF7L2:ARHGAP15:GLIS3
GWAScatalog	Total cholesterol levels	189	4	0.000223095	0.00409008	FADS2:FADS1:GCKR:FAM117B
GO_bp	GO_ION_TRANSPORT	1663	10	0.000228378	0.0299746	GRID1:KCNQ1:KCNJ11:CRY2:MTNR1B:PKD1L2:PPARG:SLC2A2:GCK:SLC30A8	http://www.gsea-msigdb.org/gsea/msigdb/cards/GO_ION_TRANSPORT
GWAScatalog	Lung function (FEV1/FVC)	193	4	0.000241631	0.0043856	FTO:CFDP1:MGAM:GLIS3
GO_bp	GO_HEPATOCYTE_DIFFERENTIATION	15	2	0.000249261	0.0320032	PROX1:HNF1B	http://www.gsea-msigdb.org/gsea/msigdb/cards/GO_HEPATOCYTE_DIFFERENTIATION
GWAScatalog	Alcohol use disorder	15	2	0.000249261	0.00443537	FTO:GCKR
GWAScatalog	Glycerophospholipid levels	15	2	0.000249261	0.00443537	FADS2:FADS1
GO_bp	GO_PANCREAS_DEVELOPMENT	78	3	0.000253964	0.0320032	PROX1:TCF7L2:HNF1B	http://www.gsea-msigdb.org/gsea/msigdb/cards/GO_PANCREAS_DEVELOPMENT
GO_bp	GO_CELLULAR_RESPONSE_TO_ENDOGENOUS_STIMULUS	1373	9	0.000259765	0.0320032	KCNQ1:CRY2:PGR:HDAC5:IRS1:PPARG:ADCY5:SPP1:GCK	http://www.gsea-msigdb.org/gsea/msigdb/cards/GO_CELLULAR_RESPONSE_TO_ENDOGENOUS_STIMULUS
GO_bp	GO_RESPONSE_TO_KETONE	197	4	0.000261251	0.0320032	KCNJ11:PPARG:ADCY5:SPP1	http://www.gsea-msigdb.org/gsea/msigdb/cards/GO_RESPONSE_TO_KETONE
GWAScatalog	High density lipoprotein cholesterol levels	81	3	0.00028388	0.00487282	FADS1:CMIP:PPARG
GWAScatalog	Sexual dimorphism in anthropometric traits	16	2	0.000284583	0.00487282	IRS1:PPARG
GWAScatalog	Plasma omega-3 polyunsaturated fatty acid level (eicosapentaenoic acid)	16	2	0.000284583	0.00487282	FADS2:FADS1
GWAScatalog	Moyamoya disease	16	2	0.000284583	0.00487282	FADS2:FADS1
GWAScatalog	Morning person	202	4	0.000287356	0.0048743	TCF7L2:FTO:ARHGAP15:PTPRD
GWAScatalog	Glomerular filtration rate (creatinine)	83	3	0.000305034	0.00507924	LPHN2:KCNQ1:GCKR
GWAScatalog	Waist circumference adjusted for BMI in active individuals	83	3	0.000305034	0.00507924	KCNQ1:PEPD:IRS1
GO_bp	GO_CELLULAR_RESPONSE_TO_PEPTIDE	377	5	0.000309962	0.036828	HDAC5:IRS1:PPARG:ADCY5:GCK	http://www.gsea-msigdb.org/gsea/msigdb/cards/GO_CELLULAR_RESPONSE_TO_PEPTIDE
GWAScatalog	Triglyceride levels in current drinkers	84	3	0.000315982	0.00512982	FADS2:CMIP:PEPD
GO_bp	GO_REGULATION_OF_TRANSCRIPTION_INVOLVED_IN_CELL_FATE_COMMITMENT	17	2	0.000322204	0.036828	PROX1:PPARG	http://www.gsea-msigdb.org/gsea/msigdb/cards/GO_REGULATION_OF_TRANSCRIPTION_INVOLVED_IN_CELL_FATE_COMMITMENT
GO_bp	GO_POSITIVE_REGULATION_OF_FATTY_ACID_METABOLIC_PROCESS	17	2	0.000322204	0.036828	IRS1:PPARG	http://www.gsea-msigdb.org/gsea/msigdb/cards/GO_POSITIVE_REGULATION_OF_FATTY_ACID_METABOLIC_PROCESS
GO_bp	GO_LINOLEIC_ACID_METABOLIC_PROCESS	17	2	0.000322204	0.036828	FADS2:FADS1	http://www.gsea-msigdb.org/gsea/msigdb/cards/GO_LINOLEIC_ACID_METABOLIC_PROCESS
GWAScatalog	Palmitic acid (16:0) levels	17	2	0.000322204	0.00512982	GCKR:PTPRD
GWAScatalog	Urolithiasis	17	2	0.000322204	0.00512982	FTO:GCKR
GWAScatalog	Plasma omega-6 polyunsaturated fatty acid levels (adrenic acid)	17	2	0.000322204	0.00512982	FADS2:FADS1
GWAScatalog	Red blood cell fatty acid levels	17	2	0.000322204	0.00512982	FADS2:FADS1
GWAScatalog	Waist circumference adjusted for BMI (joint analysis main effects and physical activity interaction)	85	3	0.00032718	0.00516376	KCNQ1:PEPD:IRS1
GO_bp	GO_POSITIVE_REGULATION_OF_MOLECULAR_FUNCTION	1740	10	0.000327961	0.036828	PROX1:TCF7L2:KCNJ11:MADD:HDAC5:ARHGAP15:IRS1:PPARG:ADCY5:GPSM1	http://www.gsea-msigdb.org/gsea/msigdb/cards/GO_POSITIVE_REGULATION_OF_MOLECULAR_FUNCTION
GO_bp	GO_CELLULAR_RESPONSE_TO_OXYGEN_CONTAINING_COMPOUND	1118	8	0.0003307	0.036828	KCNQ1:KCNJ11:HDAC5:IRS1:PPARG:ADCY5:SPP1:GCK	http://www.gsea-msigdb.org/gsea/msigdb/cards/GO_CELLULAR_RESPONSE_TO_OXYGEN_CONTAINING_COMPOUND
GO_bp	GO_CELLULAR_RESPONSE_TO_LIPID	601	6	0.000347526	0.0379721	CRY2:PGR:HDAC5:PPARG:ADCY5:SPP1	http://www.gsea-msigdb.org/gsea/msigdb/cards/GO_CELLULAR_RESPONSE_TO_LIPID
GO_bp	GO_CELLULAR_RESPONSE_TO_INSULIN_STIMULUS	213	4	0.000351306	0.0379721	HDAC5:IRS1:PPARG:GCK	http://www.gsea-msigdb.org/gsea/msigdb/cards/GO_CELLULAR_RESPONSE_TO_INSULIN_STIMULUS
GO_bp	GO_POSITIVE_REGULATION_OF_GLYCOGEN_METABOLIC_PROCESS	18	2	0.000362115	0.0385731	IRS1:GCK	http://www.gsea-msigdb.org/gsea/msigdb/cards/GO_POSITIVE_REGULATION_OF_GLYCOGEN_METABOLIC_PROCESS
GWAScatalog	Temperament	18	2	0.000362115	0.00561743	LPHN2:PTPRD
GWAScatalog	Oleic acid (18:1n-9) levels	18	2	0.000362115	0.00561743	FADS2:FADS1
GO_bp	GO_FAT_CELL_DIFFERENTIATION	217	4	0.000376901	0.0395746	TCF7L2:FTO:PPARG:FAM120B	http://www.gsea-msigdb.org/gsea/msigdb/cards/GO_FAT_CELL_DIFFERENTIATION
GO_bp	GO_HORMONE_METABOLIC_PROCESS	220	4	0.000396953	0.0410931	TCF7L2:BACE2:SPP1:PCSK1	http://www.gsea-msigdb.org/gsea/msigdb/cards/GO_HORMONE_METABOLIC_PROCESS
GWAScatalog	Triglyceride levels x alcohol consumption (drinkers vs non-drinkers) interaction (2df)	91	3	0.000399764	0.00614892	FADS2:CMIP:PEPD
GWAScatalog	Red cell distribution width	221	4	0.000403804	0.00615886	FADS2:FADS1:FTO:GCKR
GWAScatalog	Triglyceride levels x alcohol consumption (regular vs non-regular drinkers) interaction (2df)	92	3	0.000412783	0.00624334	FADS2:CMIP:PEPD
GO_bp	GO_POSITIVE_REGULATION_OF_PEPTIDE_HORMONE_SECRETION	94	3	0.000439631	0.0442642	TCF7L2:GCK:SLC30A8	http://www.gsea-msigdb.org/gsea/msigdb/cards/GO_POSITIVE_REGULATION_OF_PEPTIDE_HORMONE_SECRETION
GO_bp	GO_CELLULAR_RESPONSE_TO_KETONE	94	3	0.000439631	0.0442642	PPARG:ADCY5:SPP1	http://www.gsea-msigdb.org/gsea/msigdb/cards/GO_CELLULAR_RESPONSE_TO_KETONE
GWAScatalog	Crohn's disease	630	6	0.000445907	0.00668861	FADS2:FADS1:GCKR:CDKAL1:NACC2:GPSM1
GO_bp	GO_CELLULAR_RESPONSE_TO_NITROGEN_COMPOUND	632	6	0.000453419	0.0450355	KCNQ1:HDAC5:IRS1:PPARG:ADCY5:GCK	http://www.gsea-msigdb.org/gsea/msigdb/cards/GO_CELLULAR_RESPONSE_TO_NITROGEN_COMPOUND
GO_bp	GO_POSITIVE_REGULATION_OF_TRANSCRIPTION_BY_RNA_POLYMERASE_II	1178	8	0.000468079	0.0458718	PROX1:TCF7L2:PGR:HNF1B:HDAC5:PPARG:RREB1:GLIS3	http://www.gsea-msigdb.org/gsea/msigdb/cards/GO_POSITIVE_REGULATION_OF_TRANSCRIPTION_BY_RNA_POLYMERASE_II
GWAScatalog	Waist-to-hip ratio adjusted for BMI (age >50)	232	4	0.000484842	0.00708173	PKD1L2:CMIP:PPARG:RREB1
GWAScatalog	Height	898	7	0.000485122	0.00708173	KCNQ1:FADS1:GCKR:SPC25:IGF2BP2:RREB1:GLIS3
GO_bp	GO_ORGANIC_ACID_METABOLIC_PROCESS	901	7	0.000494836	0.0473002	PROX1:FADS2:FADS1:PEPD:GCKR:IRS1:PPARG	http://www.gsea-msigdb.org/gsea/msigdb/cards/GO_ORGANIC_ACID_METABOLIC_PROCESS
GO_bp	GO_PEROXISOME_PROLIFERATOR_ACTIVATED_RECEPTOR_SIGNALING_PATHWAY	21	2	0.000495526	0.0473002	PPARG:FAM120B	http://www.gsea-msigdb.org/gsea/msigdb/cards/GO_PEROXISOME_PROLIFERATOR_ACTIVATED_RECEPTOR_SIGNALING_PATHWAY
GWAScatalog	Serum metabolite ratios in chronic kidney disease	21	2	0.000495526	0.00708173	FADS2:FADS1
GWAScatalog	C-reactive protein levels or HDL-cholesterol levels (pleiotropy)	21	2	0.000495526	0.00708173	FADS1:FTO
GWAScatalog	Sex hormone-binding globulin levels	21	2	0.000495526	0.00708173	FTO:GCKR
GWAScatalog	Cardiovascular disease risk factors	21	2	0.000495526	0.00708173	OASL:GCKR
GWAScatalog	Red blood cell count	234	4	0.000500733	0.00710023	PROX1:GCKR:RREB1:GLIS3
GO_bp	GO_POTASSIUM_ION_TRANSPORT	235	4	0.000508816	0.0479461	KCNQ1:KCNJ11:MTNR1B:GCK	http://www.gsea-msigdb.org/gsea/msigdb/cards/GO_POTASSIUM_ION_TRANSPORT
GWAScatalog	Neurociticism	99	3	0.000511591	0.00719797	TCF7L2:AGBL1:GLIS3
GO_bp	GO_RESPONSE_TO_PEPTIDE_HORMONE	425	5	0.000534857	0.049762	HDAC5:IRS1:PPARG:ADCY5:GCK	http://www.gsea-msigdb.org/gsea/msigdb/cards/GO_RESPONSE_TO_PEPTIDE_HORMONE
GO_bp	GO_RESPONSE_TO_LIPID	915	7	0.000542243	0.0498186	KCNJ11:CRY2:PGR:HDAC5:PPARG:ADCY5:SPP1	http://www.gsea-msigdb.org/gsea/msigdb/cards/GO_RESPONSE_TO_LIPID
GWAScatalog	Alcohol use disorder (consumption score)	22	2	0.000544531	0.00748731	FTO:GCKR
GWAScatalog	Platelet aggregation	22	2	0.000544531	0.00748731	KCNQ1:PTPRD
GWAScatalog	Plasma omega-6 polyunsaturated fatty acid levels (dihomo-gamma-linolenic acid)	22	2	0.000544531	0.00748731	FADS2:FADS1
KEGG	KEGG_BIOSYNTHESIS_OF_UNSATURATED_FATTY_ACIDS	22	2	0.000544531	0.0202566	FADS2:FADS1	http://www.gsea-msigdb.org/gsea/msigdb/cards/KEGG_BIOSYNTHESIS_OF_UNSATURATED_FATTY_ACIDS
GWAScatalog	LDL cholesterol levels	102	3	0.000558177	0.00761723	FADS2:FADS1:PPARG
GWAScatalog	General factor of neuroticism	104	3	0.000590693	0.00783597	TCF7L2:MADD:RP11-115J16.1
GWAScatalog	Hyperuricemia	23	2	0.000595793	0.00783597	KCNQ1:RREB1
GWAScatalog	Body fat percentage	23	2	0.000595793	0.00783597	FTO:IRS1
GWAScatalog	Obesity (early onset extreme)	23	2	0.000595793	0.00783597	TCF7L2:FTO
GWAScatalog	Plasma omega-6 polyunsaturated fatty acid levels (arachidonic acid)	23	2	0.000595793	0.00783597	FADS2:FADS1
GWAScatalog	Loneliness (linear analysis)	24	2	0.000649304	0.00847832	AGBL1:PTPRD
GWAScatalog	Liver enzyme levels (alkaline phosphatase)	25	2	0.000705057	0.00907574	FADS2:FADS1
GWAScatalog	Plasma omega-6 polyunsaturated fatty acid levels (gamma-linolenic acid)	25	2	0.000705057	0.00907574	FADS2:FADS1
GWAScatalog	Chloride levels	26	2	0.000763046	0.00961756	GCKR:CDKAL1
GWAScatalog	C-reactive protein levels or LDL-cholesterol levels (pleiotropy)	26	2	0.000763046	0.00961756	FADS2:GCKR
GWAScatalog	Plasma omega-6 polyunsaturated fatty acid levels (linoleic acid)	26	2	0.000763046	0.00961756	FADS2:FADS1
GWAScatalog	QT interval	114	3	0.00077143	0.00965617	KCNQ1:FADS2:FADS1
GWAScatalog	Peak expiratory flow	115	3	0.000791219	0.00983604	CFDP1:IGF2BP2:GLIS3
GWAScatalog	C-reactive protein levels or triglyceride levels (pleiotropy)	28	2	0.000885702	0.0109357	FADS1:GCKR
GWAScatalog	Social communication problems	29	2	0.000950355	0.011631	KCNJ11:LHFPL3
KEGG	KEGG_THYROID_CANCER	29	2	0.000950355	0.029461	TCF7L2:PPARG	http://www.gsea-msigdb.org/gsea/msigdb/cards/KEGG_THYROID_CANCER
GWAScatalog	Inflammatory bowel disease	730	6	0.000960981	0.011631	FADS2:FADS1:GCKR:CDKAL1:NACC2:GPSM1
GWAScatalog	Serum uric acid levels	123	3	0.000961238	0.011631	KCNQ1:GCKR:RREB1
GWAScatalog	Attention deficit hyperactivity disorder and conduct disorder	30	2	0.00101722	0.012067	PKD1L2:PTPRD
GWAScatalog	Feeling fed-up	30	2	0.00101722	0.012067	TCF7L2:FAM117B
GWAScatalog	Toenail selenium levels	30	2	0.00101722	0.012067	LPHN2:ARHGAP15
GWAScatalog	Pancreatic cancer	128	3	0.00107837	0.0127094	GRID1:CFDP1:HNF1B
GWAScatalog	C-reactive protein	31	2	0.00108628	0.01272	OASL:GCKR
GWAScatalog	Cardiac Troponin-T levels	33	2	0.00123098	0.014322	RREB1:PTPRD
KEGG	KEGG_INSULIN_SIGNALING_PATHWAY	137	3	0.00131119	0.0348403	G6PC2:IRS1:GCK	http://www.gsea-msigdb.org/gsea/msigdb/cards/KEGG_INSULIN_SIGNALING_PATHWAY
GWAScatalog	Colorectal cancer	139	3	0.00136688	0.0157018	TCF7L2:FADS2:FADS1
GWAScatalog	Resting heart rate	139	3	0.00136688	0.0157018	FADS2:FADS1:GCKR
GWAScatalog	Serum metabolite concentrations in chronic kidney disease	35	2	0.00138441	0.0158031	FADS2:FADS1
Hallmark_gene_sets	HALLMARK_UV_RESPONSE_DN	144	3	0.00151255	0.0378137	LPHN2:IRS1:PPARG	http://www.gsea-msigdb.org/gsea/msigdb/cards/HALLMARK_UV_RESPONSE_DN
GWAScatalog	Arterial stiffness index	37	2	0.0015465	0.0175431	DAPK2:PPARG
GWAScatalog	Hip circumference	149	3	0.00166761	0.0187995	TCF7L2:FTO:RP11-115J16.1
GWAScatalog	Glomerular filtration rate in non diabetics (creatinine)	39	2	0.00171721	0.0192391	KCNQ1:GCKR
GWAScatalog	Experiencing mood swings	40	2	0.00180578	0.0201073	TCF7L2:ARHGAP15
GWAScatalog	Cerebral amyloid deposition (PET imaging)	41	2	0.00189648	0.0209098	LPHN2:DAPK2
GWAScatalog	Hand grip strength	156	3	0.00190089	0.0209098	TCF7L2:HMG20A:FTO
GWAScatalog	Monocyte percentage of white cells	158	3	0.00197108	0.0215513	TCF7L2:FADS1:GCKR
GWAScatalog	Liver enzyme levels (gamma-glutamyl transferase)	43	2	0.00208426	0.0226523	GCKR:SLC2A2
GWAScatalog	Blood metabolite levels	162	3	0.00211627	0.0228633	FADS1:GCKR:MGAM
GWAScatalog	Medication use (beta blocking agents)	44	2	0.00218133	0.0232889	FTO:CMIP
GWAScatalog	Urate levels in overweight individuals	44	2	0.00218133	0.0232889	LPHN2:GCKR
GWAScatalog	Melanoma	45	2	0.0022805	0.0242053	FTO:CDKAL1
GWAScatalog	Medication use (adrenergics, inhalants)	46	2	0.00238177	0.0251332	FADS2:GLIS3
GWAScatalog	Waist-to-hip ratio adjusted for BMI in active individuals	47	2	0.00248514	0.0259226	PEPD:PPARG
GWAScatalog	Type 2 diabetes (age of onset)	47	2	0.00248514	0.0259226	PROX1-AS1:PROX1
GWAScatalog	FEV1	175	3	0.00263347	0.0273129	CFDP1:IGF2BP2:GLIS3
GWAScatalog	Creatine kinase levels	50	2	0.00280774	0.0289548	PEPD:GCKR
GWAScatalog	Prostate cancer	381	4	0.00300066	0.0307694	TCF7L2:HNF1B:HAPLN1:CDKAL1
GWAScatalog	Blood metabolite ratios	54	2	0.00326679	0.0333103	FADS1:GCKR
GWAScatalog	Waist-to-hip ratio adjusted for BMI x sex x age interaction (4df test)	392	4	0.00332172	0.0336811	PKD1L2:CMIP:PPARG:RREB1
GWAScatalog	Diastolic blood pressure	650	5	0.00346144	0.0349029	TCF7L2:PGR:CMIP:ARHGAP15:PTPRD
GWAScatalog	Waist-to-hip ratio adjusted for BMI	403	4	0.00366549	0.0367562	KCNQ1:CMIP:PPARG:RREB1
GWAScatalog	Anorexia nervosa	58	2	0.00375852	0.0372771	GRID1:MGAM
GWAScatalog	Albumin-globulin ratio	58	2	0.00375852	0.0372771	FADS2:GCKR
GWAScatalog	Hippocampal volume in Alzheimer's disease dementia	59	2	0.00388651	0.0381298	SPC25:G6PC2
GWAScatalog	Ischemic stroke	59	2	0.00388651	0.0381298	TCF7L2:AGBL1
GWAScatalog	Waist-to-hip ratio adjusted for BMI (additive genetic model)	60	2	0.00401651	0.0391934	RREB1:MGAM
GWAScatalog	Idiopathic dilated cardiomyopathy	61	2	0.00414851	0.040265	FAM120B:MGAM
GWAScatalog	Subcutaneous adipose tissue	62	2	0.00428251	0.0413445	FTO:PTPRD
GWAScatalog	Breast cancer	214	3	0.00462816	0.0444451	TCF7L2:FTO:CDKAL1
GWAScatalog	Non-albumin protein levels	65	2	0.00469643	0.0448633	FADS2:GCKR
GWAScatalog	Plateletcrit	219	3	0.00493465	0.0468921	FADS2:GCKR:IGF2BP2
GWAScatalog	Response to statin therapy	67	2	0.00498225	0.0470978	FADS2:FADS1
GWAScatalog	Venous thromboembolism adjusted for sickle cell variant rs77121243-T	68	2	0.0051281	0.0479768	LPHN2:DAPK2
GWAScatalog	Body mass index (age>50)	68	2	0.0051281	0.0479768	TCF7L2:FTO
