# Supplementary material for: Polygenic Risk Score and Risk Factors for Gestational Diabetes
Source: Preprints.org preprint supplement (doi:10.20944/preprints202207.0305.v1), 2022-07-20
Supplement: Supplementary file 2 [file Table S1 - PGS for GDM.xlsx]

## Sheet: PolyGenicRiskScore
term	estimate	std.error	statistic	p.value	Overlapped Gene	Nearest Upstream Gene	Nearest Downstream Gene
rs10830963	0.267	0.046	5.834	5.39863e-09	MTNR1B
rs6959526	0.378	0.081	4.671	2.99139e-06	MGAM
rs34075917	0.205	0.045	4.54	5.6324e-06		CTC-419K13.1	ENC1
rs7903146	0.204	0.046	4.45	8.60356e-06	TCF7L2
rs11257655	0.209	0.05	4.186	2.84494e-05		RN7SL232P	RN7SL198P
rs4746822	0.19	0.046	4.123	3.73836e-05	RP11-227H15.4;HKDC1
rs79953201	0.583	0.144	4.037	5.4191e-05	HAPLN1
rs34882181	-0.149	0.042	-3.512	0.0004	PTPRD
rs535447438	-0.155	0.046	-3.355	0.0008	LPHN2
rs141240229	0.318	0.096	3.296	0.001		EEF1A1P9	AC004066.2
rs116847631	0.202	0.062	3.279	0.001	PGR
rs7957197	-0.18	0.058	-3.127	0.0018	OASL
rs116966095	0.258	0.085	3.04	0.0024	CFDP1
rs62603092	-0.248	0.082	-3.014	0.0026		RP11-274K13.5	snoU13
rs2866307	-0.145	0.049	-2.939	0.0033		RP11-168E17.1	RNU6-578P
rs7743373	-0.152	0.052	-2.902	0.0037		RP3-435K13.1	RP3-455E7.1
rs340874	0.123	0.043	2.846	0.0044	PROX1-AS1;PROX1
rs62052363	0.251	0.092	2.735	0.0062	PKD1L2
rs568927434	0.134	0.049	2.734	0.0063	SPP1
rs4376068	0.121	0.045	2.712	0.0067	IGF2BP2
rs62170385	0.27	0.102	2.64	0.0083	ARHGAP15
rs174550	-0.12	0.046	-2.588	0.0096	FADS2;FADS1
rs9505667	-0.115	0.045	-2.561	0.0104		RP5-856G1.1	AL033381.1
rs112204899	0.327	0.129	2.543	0.011	DAPK2
rs5219	-0.11	0.044	-2.466	0.0136	KCNJ11
rs1260326	0.108	0.044	2.438	0.0148	GCKR
rs72827457	0.321	0.133	2.417	0.0156		RP11-763E3.1	AC011073.1
rs9450812	0.157	0.069	2.271	0.0232		Y_RNA	RN7SL183P
rs11605924	-0.097	0.043	-2.262	0.0237	CRY2
rs5923713	-0.113	0.05	-2.263	0.0237		RP3-431C21.1	RP11-192B18.1
rs9465871	0.117	0.052	2.256	0.0241	CDKAL1
rs71842909	0.101	0.046	2.192	0.0284	IFLTD1
rs74519858	-0.296	0.136	-2.177	0.0295		CYTL1	STK32B
rs11910707	0.097	0.046	2.134	0.0329		S100B	PRMT2
rs5015480	-0.091	0.043	-2.113	0.0346		HHEX	Y_RNA
rs1344482	0.175	0.087	2.018	0.0436		RP11-297L17.6	RP11-467J12.1
rs74785350	0.276	0.137	2.017	0.0437		MAPKAPK5P1	RN7SKP278
rs16916234	0.161	0.08	1.995	0.046		RP11-809M12.1	C10orf107
rs290487	0.11	0.055	1.992	0.0464	TCF7L2
rs10885122	-0.115	0.058	-1.971	0.0488		RP11-479A21.1	BTBD7P2
rs139622108	0.296	0.153	1.934	0.0531		RP1-230L10.1	RN7SL366P
rs5945326	0.092	0.049	1.874	0.0609		RP11-66N11.7	DUSP9
rs11634981	0.095	0.052	1.845	0.065	AGBL1
rs11708067	-0.09	0.051	-1.741	0.0817	ADCY5
rs10811661	-0.097	0.058	-1.688	0.0915		CDKN2B-AS1	RP11-408N14.1
rs57617664	0.113	0.067	1.684	0.0922	NACC2
rs6517656	0.09	0.054	1.67	0.095	BACE2
rs1436953	-0.069	0.042	-1.627	0.1038		NPM1P47	C2CD4B
rs17807135	0.122	0.075	1.618	0.1057	FAM117B
rs78561521	0.182	0.114	1.604	0.1087	GRID1
rs112674932	0.073	0.051	1.433	0.1518	LHFPL3
rs5954503	-0.117	0.088	-1.337	0.1813		MAGEC1	RP3-406C18.1
rs9366198	0.067	0.051	1.326	0.1847	FAM120B
rs16955379	0.184	0.143	1.29	0.1969	CMIP
rs3802177	-0.06	0.047	-1.277	0.2015	SLC30A8
rs2237892	-0.118	0.093	-1.276	0.2019	KCNQ1
rs11787792	0.058	0.046	1.273	0.2032	GPSM1
rs7202116	0.055	0.043	1.264	0.2063	FTO
rs560887	0.061	0.048	1.251	0.2109	SPC25;G6PC2
rs9379084	-0.093	0.075	-1.241	0.2145	RREB1
rs6235	-0.056	0.049	-1.153	0.2489	CTD-2337A12.1;PCSK1
rs745405171	0.048	0.042	1.144	0.2528		SOWAHD	RPL39
rs3786897	-0.046	0.043	-1.07	0.2847	PEPD
rs1801278	0.094	0.089	1.059	0.2897	IRS1
rs266729.1	0.052	0.049	1.058	0.29
rs11920090	-0.066	0.063	-1.055	0.2916	SLC2A2
rs4480259	-0.056	0.056	-1.008	0.3133		RP3-431C21.1	RP11-192B18.1
rs4945149	-0.045	0.047	-0.961	0.3367	MYO7A
rs7944584	-0.046	0.049	-0.938	0.3483	MADD
rs237282	-0.053	0.057	-0.93	0.3524		RP11-471L13.2	LINC00670
rs1801282	-0.062	0.07	-0.881	0.3782	PPARG
rs72822657	-0.038	0.045	-0.835	0.404	HDAC5
rs163184	0.031	0.044	0.701	0.4835	KCNQ1
rs2191349	0.024	0.043	0.56	0.5752		AC006045.3	AC006458.3
rs7041847	-0.023	0.043	-0.542	0.5876	GLIS3
rs537751807	0.025	0.048	0.52	0.603		CTD-2320B12.2	RNU6-976P
rs144754710	0.027	0.056	0.489	0.6251	CTD-2058B24.2
rs112093993	0.036	0.08	0.454	0.6499		RP11-554A11.6	TPCN2
rs4430796	0.017	0.043	0.401	0.6882	HNF1B
rs71645033	0.018	0.047	0.379	0.7047		RP11-774G5.1	RP11-751A18.1
rs4607517	-0.017	0.057	-0.301	0.7631	GCK
rs7178572	-0.013	0.046	-0.289	0.7727	HMG20A
rs76346222	0.009	0.049	0.187	0.852		ARL4C	AC010148.1
rs4841132	-0.013	0.074	-0.178	0.859	RP11-115J16.1
