# Supplementary material for: Polygenic Risk Score and Risk Factors for Gestational Diabetes
Source: Preprints.org preprint supplement (doi:10.20944/preprints202207.0305.v1), 2022-07-20
Supplement: Supplementary file 3 [file Table S1b - GDM with stepwise model.xlsx]

## Sheet: Sheet1
SNP	Estimated Coefficient	Standard Error	Statistic	P value
rs535447438	-0.153044	0.0460934	-3.32031	0.000899188
rs340874	0.108038	0.0428715	2.52003	0.0117344
rs1260326	0.117237	0.0442317	2.65052	0.00803685
rs62170385	0.271546	0.101996	2.66232	0.00776042
rs17807135	0.125064	0.0750291	1.66688	0.0955386
rs11708067	-0.0887743	0.051233	-1.73275	0.0831393
rs4376068	0.120568	0.0443363	2.71939	0.00654017
rs74519858	-0.303389	0.136002	-2.23076	0.0256968
rs2866307	-0.128039	0.0489917	-2.61347	0.0089627
rs568927434	0.135014	0.0485588	2.78043	0.00542868
rs141240229	0.318902	0.0965117	3.30429	0.000952181
rs34075917	0.210763	0.044899	4.69415	2.67715e-06
rs79953201	0.568208	0.143501	3.95961	7.50727e-05
rs9505667	-0.113392	0.0448256	-2.52962	0.0114185
rs9465871	0.12299	0.0513528	2.395	0.0166204
rs7743373	-0.145572	0.0520057	-2.79916	0.00512361
rs9450812	0.158936	0.0686975	2.31356	0.0206917
rs139622108	0.319035	0.152751	2.08859	0.0367445
rs9366198	0.0738101	0.0504977	1.46165	0.143836
rs6959526	0.390228	0.0804711	4.8493	1.239e-06
rs34882181	-0.152619	0.0421093	-3.62435	0.000289685
rs10811661	-0.105109	0.0572441	-1.83616	0.0663345
rs57617664	0.113218	0.0668355	1.69399	0.090268
rs11257655	0.201102	0.0496008	4.0544	5.02625e-05
rs16916234	0.157691	0.0799666	1.97197	0.0486136
rs4746822	0.183912	0.0458626	4.01006	6.07024e-05
rs5015480	-0.0848396	0.042781	-1.98311	0.0473548
rs74785350	0.272875	0.136351	2.00126	0.0453639
rs10885122	-0.117381	0.0573194	-2.04784	0.0405753
rs7903146	0.205427	0.045755	4.48971	7.13202e-06
rs290487	0.116054	0.0548695	2.11509	0.034422
rs2237892	-0.138423	0.0898619	-1.54039	0.123465
rs5219	-0.0990139	0.0443513	-2.23249	0.0255826
rs11605924	-0.0940028	0.0426895	-2.20201	0.0276644
rs174550	-0.120017	0.0462118	-2.59711	0.00940111
rs10830963	0.268098	0.0455603	5.88447	3.9934e-09
rs116847631	0.203871	0.0613679	3.32211	0.00089338
rs71842909	0.106591	0.0457749	2.32858	0.0198811
rs7957197	-0.187912	0.0574658	-3.26998	0.00107554
rs1436953	-0.0670668	0.0423166	-1.58488	0.112993
rs112204899	0.32152	0.128058	2.51075	0.0120475
rs11634981	0.0943929	0.051449	1.83469	0.0665517
rs1344482	0.142252	0.085286	1.66794	0.0953269
rs116966095	0.25006	0.0846364	2.95452	0.00313154
rs62052363	0.253191	0.0911514	2.77769	0.00547463
rs72827457	0.319117	0.132615	2.40635	0.0161127
rs6517656	0.100937	0.0535451	1.88508	0.0594194
rs11910707	0.105999	0.0454112	2.3342	0.0195853
rs5923713	-0.14395	0.0402134	-3.57966	0.000344039
rs62603092	-0.250289	0.0819225	-3.05519	0.00224917
rs5945326	0.0856711	0.0487619	1.75693	0.0789301
