# Supplementary material for: Polygenic Risk Score and Risk Factors for Gestational Diabetes
Source: Preprints.org preprint supplement (doi:10.20944/preprints202207.0305.v1), 2022-07-20
Supplement: Supplementary file 4 [file Table S2a - GDM - ORs.xlsx]

## Sheet: gestDiabetes_commonProcedure
%	OR	CI
top 25%	3.59806	[3.130426, 4.13556]
top 10%	5.27423	[4.473554, 6.218203]
top 5%	6.14823	[5.029648, 7.515581]
top 2%	8.7532	[6.680282, 11.46935]
top 1%	10.5468	[7.384007, 15.06442]
Group	OR	CI 95% lower	CI 95% upper
Ideal1	0.180623	0.105329	0.309742
Ideal2	0.252943	0.157389	0.406509
Ideal3	0.308136	0.196729	0.482631
Ideal4	0.421474	0.27783	0.639384
Ideal5	0.615513	0.421864	0.898054
Ideal6	0.651884	0.448005	0.948543
Ideal7	1.10611	0.781765	1.56503
Medium1	0.330497	0.196204	0.556706
Medium2	0.686106	0.448107	1.05051
Medium3	0.787683	0.523043	1.18622
Medium5	1.15332	0.79179	1.67992
Medium6	1.54312	1.08168	2.20142
Medium7	2.86724	2.06643	3.9784
Poor1	0.761337	0.460443	1.25886
Poor2	1.57003	1.03439	2.38303
Poor3	1.32856	0.864417	2.04194
Poor4	2.34307	1.6034	3.42395
Poor5	2.33918	1.59855	3.42295
Poor6	3.05484	2.11983	4.40226
Poor7	6.33162	4.5291	8.85152

## Sheet: gestDiabetes_stepwiseProcedure
%	OR	CI (95%)
top 25%	3.49203	[3.041838, 4.008852]
top 10%	4.83854	[4.101696, 5.707763]
top 5%	6.0901	[4.990309, 7.432258]
top 2%	7.55628	[5.738961, 9.949065]
top 1%	10.2146	[7.154661, 14.58331]
Group	OR	CI 95% lower	CI 95% upper
Ideal1	0.140509	0.0805193	0.245194
Ideal2	0.286845	0.184651	0.445597
Ideal3	0.197778	0.120611	0.324317
Ideal4	0.426797	0.287694	0.633156
Ideal5	0.596213	0.416215	0.854054
Ideal6	0.525828	0.361007	0.765899
Ideal7	1.00119	0.71641	1.39917
Medium1	0.385544	0.239605	0.620371
Medium2	0.513932	0.33271	0.793861
Medium3	0.575282	0.377955	0.875632
Medium5	1.24242	0.869294	1.7757
Medium6	1.29028	0.908559	1.83237
Medium7	2.53266	1.84628	3.47422
Poor1	0.782539	0.483072	1.26765
Poor2	1.33829	0.895242	2.00059
Poor3	1.27914	0.844205	1.93816
Poor4	2.05605	1.411	2.99599
Poor5	2.33861	1.62427	3.36712
Poor6	2.83907	2.00439	4.02135
Poor7	5.35111	3.85352	7.4307
