# Supplementary material for: Polygenic Risk Score and Risk Factors for Gestational Diabetes
Source: Preprints.org preprint supplement (doi:10.20944/preprints202207.0305.v1), 2022-07-20
Supplement: Supplementary file 9 [file Table S4 - TwoSampleMR.xlsx]

## Sheet: MR_exposure_gestational_diabete
ukb-b-19953	Body mass index (BMI)	finn-b-GEST_DIABETES	Gestational diabetes (for exclusion) || id:finn-b-GEST_DIABETES	Inverse variance weighted	375	0.546969	0.0695262	3.62981e-15	0.410698	0.68324	1.72801	1.50787	1.98028
ukb-a-248	Body mass index (BMI)	finn-b-GEST_DIABETES	Gestational diabetes (for exclusion) || id:finn-b-GEST_DIABETES	Inverse variance weighted	253	0.539251	0.0731826	1.72473e-13	0.395813	0.682689	1.71472	1.48559	1.97919
ukb-b-2303	Body mass index (BMI)	finn-b-GEST_DIABETES	Gestational diabetes (for exclusion) || id:finn-b-GEST_DIABETES	Inverse variance weighted	364	0.534101	0.0691488	1.128e-14	0.398569	0.669632	1.70591	1.48969	1.95352
finn-b-R18_ELEVATED_BLOOD_GLUCOSE_LEVEL	Elevated blood glucose level	finn-b-GEST_DIABETES	Gestational diabetes (for exclusion) || id:finn-b-GEST_DIABETES	Wald ratio	1	0.32142	0.0660587	1.14069e-06	0.191945	0.450895	1.37908	1.2116	1.56972
ebi-a-GCST008032	Fasting blood glucose	finn-b-GEST_DIABETES	Gestational diabetes (for exclusion) || id:finn-b-GEST_DIABETES	Inverse variance weighted	6	1.2008	0.473739	0.0112536	0.272269	2.12932	3.32276	1.31294	8.40918
ebi-a-GCST90002232	Fasting glucose	finn-b-GEST_DIABETES	Gestational diabetes (for exclusion) || id:finn-b-GEST_DIABETES	Inverse variance weighted	60	2.63855	0.260675	4.41332e-24	2.12763	3.14947	13.9929	8.39493	23.3238
ebi-a-GCST90002230	Fasting glucose	finn-b-GEST_DIABETES	Gestational diabetes (for exclusion) || id:finn-b-GEST_DIABETES	Inverse variance weighted	4	2.47188	0.760724	0.00115655	0.980866	3.9629	11.8448	2.66677	52.6099
ebi-a-GCST90002234	Fasting glucose	finn-b-GEST_DIABETES	Gestational diabetes (for exclusion) || id:finn-b-GEST_DIABETES	Inverse variance weighted	3	2.38783	1.01042	0.0181182	0.407397	4.36826	10.8898	1.5029	78.906
ebi-a-GCST90002233	Fasting glucose	finn-b-GEST_DIABETES	Gestational diabetes (for exclusion) || id:finn-b-GEST_DIABETES	Inverse variance weighted	7	2.04634	0.887738	0.02116	0.306374	3.78631	7.73953	1.35849	44.0933
ieu-b-114	Fasting glucose	finn-b-GEST_DIABETES	Gestational diabetes (for exclusion) || id:finn-b-GEST_DIABETES	Inverse variance weighted	28	1.78769	0.385909	3.61441e-06	1.0313	2.54407	5.97561	2.80472	12.7313
met-d-Glucose	Glucose	finn-b-GEST_DIABETES	Gestational diabetes (for exclusion) || id:finn-b-GEST_DIABETES	Inverse variance weighted	18	1.01317	0.297461	0.000659073	0.430147	1.59619	2.75432	1.53748	4.93421
ukb-d-30750_irnt	Glycated haemoglobin	finn-b-GEST_DIABETES	Gestational diabetes (for exclusion) || id:finn-b-GEST_DIABETES	Inverse variance weighted	265	0.73333	0.0817285	2.89202e-19	0.573142	0.893518	2.082	1.77383	2.44371
ebi-a-GCST90002244	Glycated hemoglobin levels	finn-b-GEST_DIABETES	Gestational diabetes (for exclusion) || id:finn-b-GEST_DIABETES	Inverse variance weighted	63	1.55562	0.487531	0.00141874	0.600058	2.51118	4.73802	1.82222	12.3194
ieu-a-51	Hip circumference	finn-b-GEST_DIABETES	Gestational diabetes (for exclusion) || id:finn-b-GEST_DIABETES	Inverse variance weighted	14	0.841919	0.215631	9.4444e-05	0.419282	1.26456	2.32082	1.52087	3.54152
ieu-a-50	Hip circumference	finn-b-GEST_DIABETES	Gestational diabetes (for exclusion) || id:finn-b-GEST_DIABETES	Inverse variance weighted	18	0.548983	0.227336	0.0157414	0.103405	0.994561	1.73149	1.10894	2.70354
ukb-b-15590	Hip circumference	finn-b-GEST_DIABETES	Gestational diabetes (for exclusion) || id:finn-b-GEST_DIABETES	Inverse variance weighted	356	0.178841	0.0826808	0.030539	0.0167866	0.340895	1.19583	1.01693	1.40621
id.exposure	id.outcome	outcome	exposure	method	nsnp	b	se	pval	lo_ci	up_ci	or	or_lci95	or_uci95
ukb-d-30770_irnt	IGF-1	finn-b-GEST_DIABETES	Gestational diabetes (for exclusion) || id:finn-b-GEST_DIABETES	Inverse variance weighted	286	0.14772	0.0565384	0.00898188	0.0369051	0.258536	1.15919	1.03759	1.29503	e-8
met-a-314	Mannose	finn-b-GEST_DIABETES	Gestational diabetes (for exclusion) || id:finn-b-GEST_DIABETES	Wald ratio	1	2.69704	0.482916	2.33827e-08	1.75052	3.64355	14.8357	5.75762	38.2274
pc2	PC2	finn-b-GEST_DIABETES	Gestational diabetes (for exclusion) || id:finn-b-GEST_DIABETES	Inverse variance weighted	134	0.535727	0.0816859	5.43998e-11	0.375622	0.695831	1.70869	1.4559	2.00537
pc3	PC3	finn-b-GEST_DIABETES	Gestational diabetes (for exclusion) || id:finn-b-GEST_DIABETES	Inverse variance weighted	149	0.366203	0.061381	2.43052e-09	0.245896	0.48651	1.44225	1.27877	1.62663
ebi-a-GCST000569	Two-hour glucose challenge	finn-b-GEST_DIABETES	Gestational diabetes (for exclusion) || id:finn-b-GEST_DIABETES	Wald ratio	1	1.61385	0.203077	1.91129e-15	1.21582	2.01188	5.02209	3.37304	7.47734
ieu-a-62	Waist circumference	finn-b-GEST_DIABETES	Gestational diabetes (for exclusion) || id:finn-b-GEST_DIABETES	Inverse variance weighted	14	0.867772	0.212166	4.3128e-05	0.451925	1.28362	2.3816	1.57133	3.60968
ieu-a-63	Waist circumference	finn-b-GEST_DIABETES	Gestational diabetes (for exclusion) || id:finn-b-GEST_DIABETES	Inverse variance weighted	14	0.841919	0.215631	9.4444e-05	0.419282	1.26456	2.32082	1.52087	3.54152
ieu-a-60	Waist circumference	finn-b-GEST_DIABETES	Gestational diabetes (for exclusion) || id:finn-b-GEST_DIABETES	Inverse variance weighted	36	0.620245	0.234775	0.00824494	0.160086	1.0804	1.85938	1.17361	2.94587
ukb-b-9405	Waist circumference	finn-b-GEST_DIABETES	Gestational diabetes (for exclusion) || id:finn-b-GEST_DIABETES	Inverse variance weighted	293	0.601363	0.0911402	4.16111e-11	0.422729	0.779998	1.8246	1.52612	2.18147
ieu-a-65	Waist circumference	finn-b-GEST_DIABETES	Gestational diabetes (for exclusion) || id:finn-b-GEST_DIABETES	Inverse variance weighted	12	0.593406	0.276232	0.0316965	0.0519916	1.13482	1.81014	1.05337	3.11061
ieu-a-69	Waist circumference	finn-b-GEST_DIABETES	Gestational diabetes (for exclusion) || id:finn-b-GEST_DIABETES	Inverse variance weighted	19	0.582177	0.163442	0.000368073	0.26183	0.902523	1.78993	1.29931	2.46582
ukb-a-382	Waist circumference	finn-b-GEST_DIABETES	Gestational diabetes (for exclusion) || id:finn-b-GEST_DIABETES	Inverse variance weighted	179	0.505985	0.105149	1.4936e-06	0.299894	0.712077	1.65862	1.34972	2.03822
ieu-a-68	Waist circumference	finn-b-GEST_DIABETES	Gestational diabetes (for exclusion) || id:finn-b-GEST_DIABETES	Inverse variance weighted	18	0.484919	0.20155	0.0161306	0.0898806	0.879958	1.62404	1.09404	2.4108
female_whr	WHR	finn-b-GEST_DIABETES	Gestational diabetes (for exclusion) || id:finn-b-GEST_DIABETES	Inverse variance weighted	112	0.565207	0.0808712	2.76909e-12	0.406699	0.723714	1.75981	1.50185	2.06208
